# Supplementary material
Source: PubMed Central journal article supplement (PMC5501084)
Supplement: NIHMS873015-supplement-Supporting_Information.pdf [file NIHMS873015-supplement-Supporting_Information.pdf]

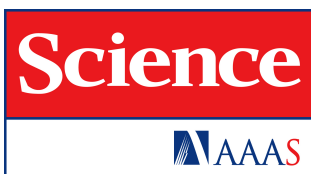

## Supplementary Materials for

### Enantioselective photochemistry via Lewis acid catalyzed triplet energy transfer

Travis R. Blum, Zachary D. Miller, Desiree M. Bates, Iliia A. Guzei, Tehshik P. Yoon\*

correspondence to: [tyoon@chem.wisc.edu](mailto:tyoon@chem.wisc.edu)

**This PDF file includes:**

Materials and Methods  
Supplementary Text  
Figs S1 to S7  
Tables S1 to S18  
Spectral and Chromatographic Data  
References

## Materials and Methods

- A. General Information
- B. Optimization and Control Studies
- C. General Procedures A and B for Isolation Scale Asymmetric [2+2] Cycloadditions
- D. Stereochemical Assignment of Minor Diastereomer by 1D NOESY
- E. Procedure for Derivatization of **9** for X-ray Analysis
- F. X-Ray Crystallographic Data for **S1**
- G. Procedure for Asymmetric [2+2] Cycloadditions Photosensitized by Benzil
- H. Computational Experiments Modeling the Excited States of 2'-Hydroxychalcone **2**
- I. Procedure for Spectrofluorimetry of 2'-Hydroxychalcone **2**
- J. Cyclic Voltammetry
- K. SFC and HPLC Chromatograms
- L. NMR Spectra
- M. References

### A. General Information:

**Reagent Preparation.** MeCN solvent was purified by elution through alumina as described by Grubbs.(38) A 23 W (1200 lumens) SLI Lighting Mini-Lynx compact fluorescent light bulb (CFL) or a 15W EagleLight PAR38 blue LED flood light (500 lumens) was used for all photochemical reactions, unless otherwise noted. Flash-column chromatography was performed with Silicycle 40–63Å silica (230–40 mesh). 2,3-Dimethyl-1,3-butadiene and isoprene were purchased from Sigma Aldrich and distilled prior to use. 2,3-Butadiene (20 wt% in toluene) was purchased from TCI and *trans*-2,3-pentadiene was purchased from Aldrich, and both were used as received. Bisoxazoline ligands were prepared according to literature methods.(39) Ru(bpy)<sub>3</sub>(PF<sub>6</sub>)<sub>2</sub> was prepared according to known procedures.(40) Unless otherwise noted, all other compounds were purchased from Sigma Aldrich or Strem and were used without further purification. All 2'-hydroxychalcones were previously documented substrates and were synthesized according to a known procedure.(41)

**Product Characterization.** Diastereomer ratios for all compounds were determined by <sup>1</sup>H NMR analysis of unpurified reaction mixtures. Enantiomeric excesses were determined by analysis of isolated material using chiral SFC (Waters Investigator system) or HPLC Shimadzu LC-20AB with Daicel CHIRALPAK® columns and Chromasolv®-grade methanol, *i*-PrOH, or 25% *i*-PrOH in hexanes. <sup>1</sup>H and <sup>13</sup>C NMR data for all previously uncharacterized compounds were obtained using a Bruker Avance 500 spectrometer with DCH cryoprobe and are referenced to tetramethyl silane (0.0 ppm) and CDCl<sub>3</sub> (77.0 ppm), respectively. These facilities are funded by the NSF (CHE-9974839, CHE-9304546) and the University of Wisconsin–Madison. IR spectral data were obtained using a Bruker Vector 22 or Alpha Platinum spectrometer (thin film). Melting points were obtained using a Stanford Research Systems DigiMelt apparatus and are uncorrected. Optical rotations were measured using a Rudolph Research Autopol III polarimeter at room temperature. UV-vis absorption spectra were obtained on a Varian Cary 50 spectrophotometer. Emission spectra were obtained on a Horiba Scientific NanoLog FluoroLog3 Spectrofluorimeter with a 1024 channel InGaAs Array NearIR detector. Cyclic voltammetry was performed on a Pine WaveNow (SN4415109) potentiostat.

### B. Optimization and Control Studies:

Optimization studies were conducted on small (0.1 mmol) scale. An example procedure follows. In an oven-dried 2 dram vial were combined 2'-hydroxychalcone (**2**, 22.4 mg, 0.100 mmol), Sc(OTf)<sub>3</sub> (4.9 mg, 0.10 equiv.), (*S,S*)-*t*-BuPyBox (5.0 mg, 0.15 equiv.), Ru(bpy)<sub>3</sub>(PF<sub>6</sub>)<sub>2</sub>

(1.3 mg, 0.025 equiv.), and phenanthrene as an internal standard. A magnetic stir bar was added, and the contents were dissolved in 3:1 *i*-PrOAc:MeCN (3 mL). To the resulting solution was added 2,3-dimethyl-1,3-butadiene (110  $\mu$ L, 9.72 equiv.) by syringe, then the vial was sealed with a Teflon-lined cap and stirred under 23W CFL irradiation for 20 h at room temperature. The reaction progress was monitored by TLC (10% EtOAc/Hexanes). At 20 h, the reaction mixture was diluted with H<sub>2</sub>O and Et<sub>2</sub>O (approx. 2.0 mL each), and mixed vigorously. After allowing the layers to separate, the organic layer was removed, dried by passing through a plug of MgSO<sub>4</sub>, and concentrated *in vacuo*. The yield of **4** was obtained by <sup>1</sup>H NMR spectroscopic analysis of the crude reaction mixture (relative to phenanthrene internal standard), then the crude material was purified by flash-column chromatography (2.5% EtOAc/Hexanes) to afford pure material for analysis.

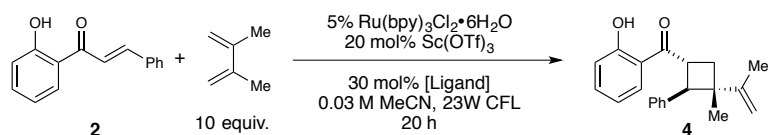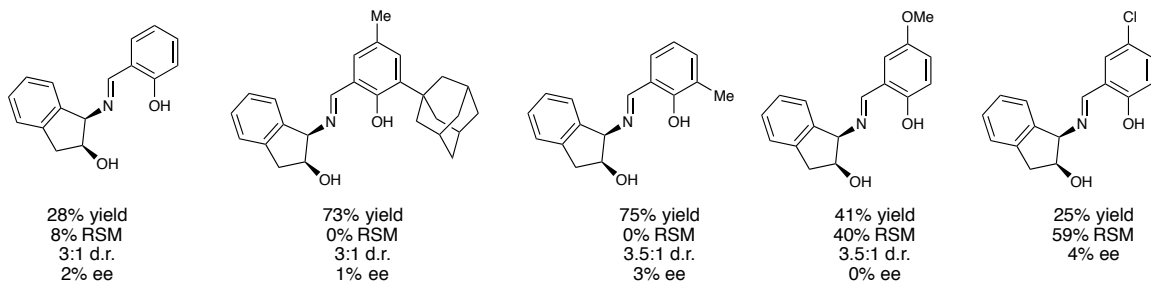

| Ligand           | Remaining SM | Yield | dr    | ee |
|------------------|--------------|-------|-------|----|
| <i>t</i> -Bu-Box | 33%          | 34%   | 3.5:1 | 0% |
| Indanyl-Box      | 0%           | 47%   | -     | 2% |
| Ph-Box           | 0%           | 61%   | 3.5:1 | 0% |
| Bn-Box           | 0%           | 63%   | 3.5:1 | 2% |

  

| Ligand             | Remaining SM | Yield | dr    | ee  |
|--------------------|--------------|-------|-------|-----|
| <i>i</i> -Pr-PyBox | 43%          | 43%   | 3:1   | 23% |
| Cyclohexyl-PyBox   | 27%          | 46%   | 3.5:1 | 11% |
| <i>i</i> -BuPyBox  | 43%          | 35%   | 2.5:1 | 51% |
| <i>t</i> -BuPyBox  | 0%           | 82%   | 3:1   | 62% |

**Table S1.** Chiral ligand effects in the asymmetric [2+2] photocycloaddition

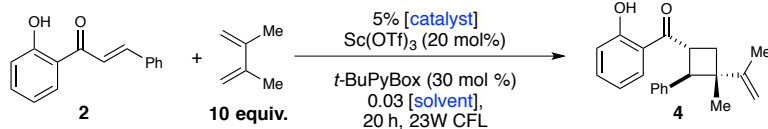

| Entry | [catalyst]                                                           | [solvent]                | Excited state potentials (vs. SCE) |                                 | Yield [2+2] (%ee) |
|-------|----------------------------------------------------------------------|--------------------------|------------------------------------|---------------------------------|-------------------|
|       |                                                                      |                          | 2 <sup>+</sup> */3 <sup>+</sup>    | 2 <sup>+</sup> */1 <sup>+</sup> |                   |
| 1     | Ru(bpy) <sub>3</sub> (PF <sub>6</sub> ) <sub>2</sub>                 | MeCN                     | -0.81 V                            | +0.77 V                         | 75% (74%)         |
| 2     | Ru(CF <sub>3</sub> bpy) <sub>3</sub> (PF <sub>6</sub> ) <sub>2</sub> | MeCN                     | -0.35 V                            | +1.11                           | 15%               |
| 3     | Ru(deeb) <sub>3</sub> (PF <sub>6</sub> ) <sub>2</sub>                | MeCN                     | -0.42 V                            | +1.07 V                         | 68% (51%)         |
| 4     | Ru(dmb) <sub>3</sub> (PF <sub>6</sub> ) <sub>2</sub>                 | MeCN                     | -1.16 V                            | +0.20 V                         | 78% (69%)         |
| 5     | Ru(dtbbpy) <sub>3</sub> (PF <sub>6</sub> ) <sub>2</sub>              | MeCN                     | -1.05 V                            | +0.72                           | 41% (72%)         |
| 6     | Ru(bpy) <sub>3</sub> (PF <sub>6</sub> ) <sub>2</sub>                 | 3:1 <i>i</i> -PrOAc:MeCN | -1.16 V                            | +0.20 V                         | 93% (94%)         |
| 7     | Ru(deeb) <sub>3</sub> (PF <sub>6</sub> ) <sub>2</sub>                | 3:1 <i>i</i> -PrOAc:MeCN | -0.42 V                            | +1.07 V                         | 67% (94%)         |
| 8     | Ru(dmb) <sub>3</sub> (PF <sub>6</sub> ) <sub>2</sub>                 | 3:1 <i>i</i> -PrOAc:MeCN | -1.16 V                            | +0.20 V                         | 86% (97%)         |

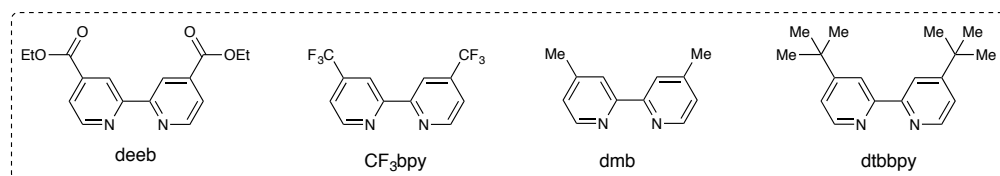

**Table S2.** Photocatalyst effects in the asymmetric [2+2] photocycloaddition

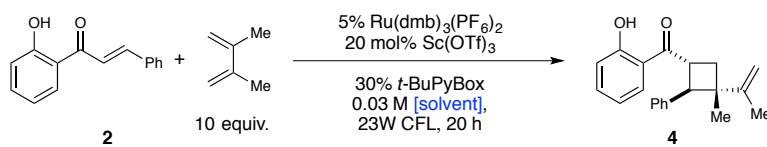

| Solvent                     | Remaining SM | Yield | dr    | ee  |
|-----------------------------|--------------|-------|-------|-----|
| MeCN                        | 0%           | 75%   | 3:1   | 74% |
| 3:1 <i>i</i> -PrOAc: MeCN   | 0%           | 87%   | 3:1   | 94% |
| 3:1 DCM: MeCN               | 0%           | 79%   | 3:1   | 91% |
| 3:1 TBME: MeCN              | 0%           | 84%   | 2.5:1 | 91% |
| 3:1 Et <sub>2</sub> O: MeCN | 0%           | 86%   | 2.5:1 | 94% |

**Table S3.** Solvent effects in the asymmetric [2+2] photocycloaddition

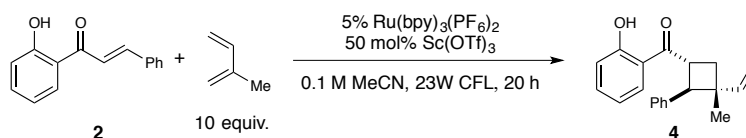

| Conditions                | Yield (7.5 h) | Yield (22 h) |
|---------------------------|---------------|--------------|
| Under air                 | 23%           | 72%          |
| N <sub>2</sub> (sparged)  | 26%           | 66%          |
| N <sub>2</sub> (degassed) | 34%           | 62%          |

**Table S4.** Effects of degassing on the asymmetric [2+2] photocycloaddition

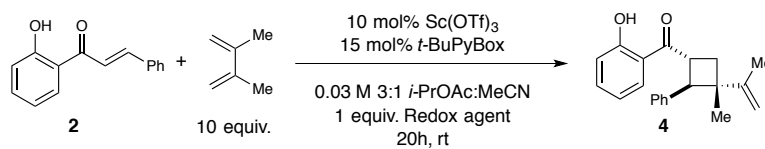

| Oxidant                                                         | Result             | Reductant         | Result                                       |
|-----------------------------------------------------------------|--------------------|-------------------|----------------------------------------------|
| CAN                                                             | 0% yield, 69% RSM  | TDAE              | 0% yield, 88% RSM                            |
| Fe(acac) <sub>3</sub>                                           | 0% yield, 85% RSM  | Sml <sub>2</sub>  | 0% yield, 34% Chalcone reduction<br>2% RSM** |
| K <sub>3</sub> [Fe(CN) <sub>6</sub> ]                           | 0% yield, 105% RSM | Li[Naphthalenide] | 0% yield, 70% RSM**                          |
| Mn(OAc) <sub>3</sub>                                            | 0% yield, 104% RSM | Cobaltocene       | 0% yield, 54% chromanone<br>26% RSM          |
| (Ar <sub>3</sub> N) <sup>+</sup> SbCl <sub>6</sub> <sup>-</sup> | 0% yield, 96% RSM  |                   |                                              |

\*\**i*-PrOAc replaced with THF due to known reactivity of esters

**Table S5.** Failed attempts to replicate [2+2] cycloaddition using chemical redox reagents. CAN: cerium(IV) ammonium nitrate, TDAE: Tetrakis(dimethylamino)ethylene, (Ar<sub>3</sub>N)<sup>+</sup>SbCl<sub>6</sub><sup>-</sup>: tris(2,4-dibromophenyl)aminium hexachloroantimonate.



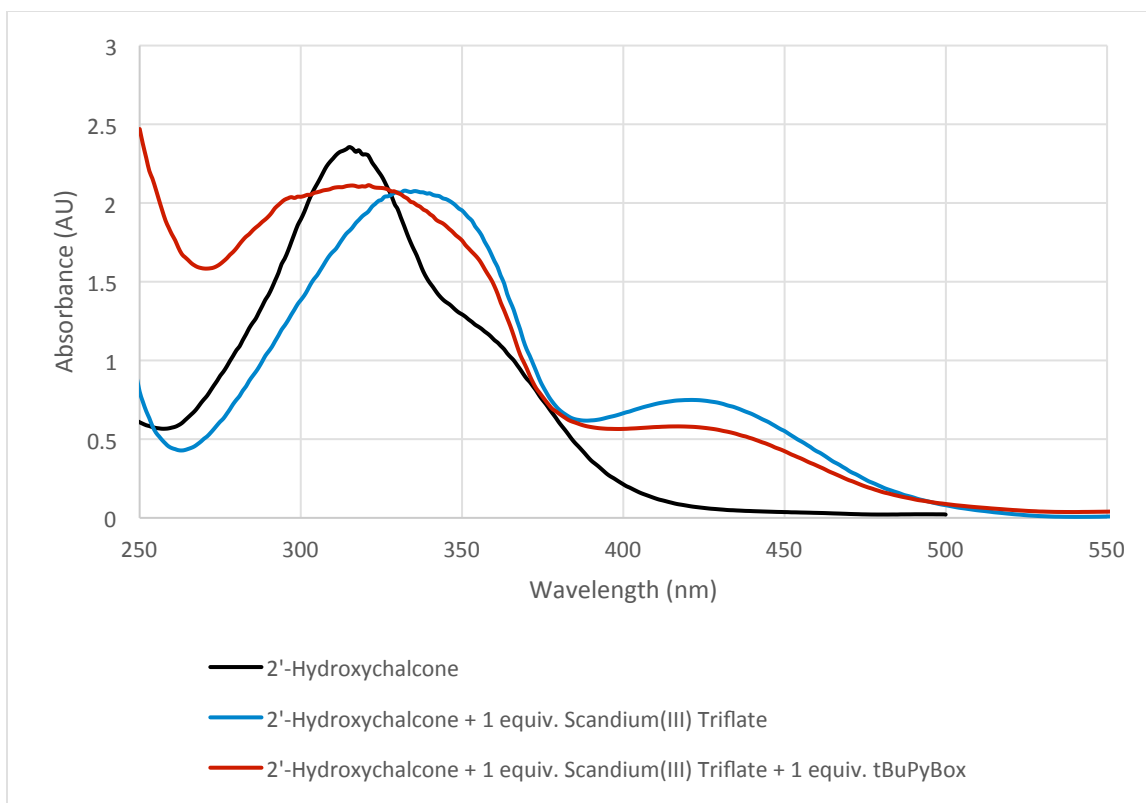

**Fig. S1.** Lewis acid effects on UV-Vis absorption for 2'-hydroxychalcone (**4**). All measurements obtained at ambient temperature at a concentration of  $1.0 \times 10^{-4}$  M 2'-hydroxychalcone in MeCN. 2'-hydroxychalcone (black), 2'-hydroxychalcone + 1 equiv. Sc(OTf)<sub>3</sub> (blue), 2'-hydroxychalcone + 1 equiv. Sc(OTf)<sub>3</sub> + 1 equiv. tBuPyBox (red).

### C. Isolation Scale Asymmetric [2+2] Cycloadditions (Figure 2)

**General Procedure A for Isolation Scale Asymmetric [2+2] Cycloaddition with 23 W CFLs:** In an oven-dried 6 dram vial were combined 2'-hydroxychalcone (1.0 equiv.), Sc(OTf)<sub>3</sub> (0.10 equiv.), (*S,S*)-*t*-BuPyBox (0.15 equiv.), and Ru(bpy)<sub>3</sub>(PF<sub>6</sub>)<sub>2</sub> (0.025 equiv.). A magnetic stir bar was added, and the contents were dissolved in 3:1 *i*-PrOAc:MeCN (12 mL). To the resulting solution was added the diene (10 equiv.) by syringe, then the vial was sealed with a Teflon-lined cap and stirred under 23W CFL irradiation for 20 h at room temperature. The reaction progress was monitored by TLC, and at 20 h, the reaction mixture was filtered through a plug of silica (eluting with 5% MeOH/Et<sub>2</sub>O). The filtrate was then concentrated *in vacuo* and the crude material was purified by flash-column chromatography to afford analytically pure material for analysis. The isolated yields reported in Table 2 represent the summation of both major and minor diastereomeric cycloadducts. Unless otherwise noted, characterization data and enantiomeric excesses are reported for the major isomer.

**(2-Hydroxyphenyl)((1*R*,2*R*,3*S*)-3-methyl-2-phenyl-3-(prop-1-en-2-yl)methanone** (Figure 2, **4**). **Experiment 1:** Prepared according to general procedure A using 89.6 mg (0.40 mmol) (*E*)-1-(2-hydroxyphenyl)-3-phenylprop-2-en-1-one, 19.2 mg (0.04 mmol) Sc(OTf)<sub>3</sub>, 20.0 mg (0.06 mmol) (*S,S*)-*t*-BuPyBox, 8.7 mg (0.01 mmol) Ru(bpy)<sub>3</sub>(PF<sub>6</sub>)<sub>2</sub>, 12 mL (3:1) *i*-PrOAc:MeCN, 450 μL (4.0 mmol) 2,3-dimethylbutadiene, and an irradiation time of 20 h. The crude

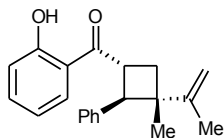

material resulted in a 3:1 (major:minor) mixture of inseparable diastereomers that was purified by flash-column chromatography on silica gel (2.5% EtOAc:Hex). Combined yield: 108 mg (88%, 0.35 mmol) as a 3:1 (major:minor) mixture of diastereomers; Major isomer: 93% ee (Daicel CHIRALPAK<sup>®</sup> OD-H, gradient 5-50% *i*-PrOH, 4.0 mL/min, 241 nm;  $t_1 = 4.4$  min,  $t_2 = 4.8$  min). Minor isomer: 93% ee (Daicel CHIRALPAK<sup>®</sup> OD-H, gradient 5-20% MeOH, 4.0 mL/min, 245 nm;  $t_1 = 4.28$  min,  $t_2 = 4.59$  min). Characterization data was obtained for the major diastereomer (a white solid) by flash-column chromatography (2.5% EtOAc:Hex), while data for the minor diastereomer (a white solid) was obtained by iterative prep TLC (10% acetone:Hex). **Experiment 2:** 89.6 mg of a clear oil (0.40 mmol) (*E*)-1-(2-hydroxyphenyl)-3-phenylprop-2-en-1-one, 19.2 mg (0.04 mmol) Sc(OTf)<sub>3</sub>, 20.0 mg (0.06 mmol) (*S,S*)-*t*-BuPyBox, 8.7 mg (0.01 mmol) Ru(bpy)<sub>3</sub>(PF<sub>6</sub>)<sub>2</sub>, 12 mL (3:1) *i*-PrOAc:MeCN, 450  $\mu$ L (4.0 mmol) 2,3-dimethylbutadiene. Crude d.r.: 3:1; Combined isolated yield: 98 mg of a clear oil (80%, 0.32 mmol); 93% ee.

**(1*R*,2*R*,3*S*) Diastereomer (major):** <sup>1</sup>H NMR (500 MHz, CDCl<sub>3</sub>):  $\delta$  12.35 (s, 1H), 7.72 (dd,  $J = 8.0, 1.6$  Hz, 1H), 7.45 (ddd,  $J = 8.7, 7.2, 1.7$  Hz, 1H), 7.31 (dd,  $J = 8.8, 6.9$  Hz, 2H), 7.23 (d,  $J = 7.5$  Hz, 3H), 6.98 (dd,  $J = 8.4, 1.1$  Hz, 1H), 6.86 (ddd,  $J = 8.2, 7.2, 1.1$  Hz, 1H), 4.91 (s, 1H), 4.84 (m, 1H), 4.25 (q,  $J = 9.8$  Hz, 1H), 4.19 (d,  $J = 10.0$  Hz, 1H), 2.40 (t,  $J = 10.0$  Hz, 1H), 2.23 (dd,  $J = 10.9, 8.7$  Hz, 1H), 1.75 (s, 3H), 1.37 (s, 3H); <sup>13</sup>C NMR (126 MHz, CDCl<sub>3</sub>):  $\delta$  206.3, 162.8, 152.2, 139.5, 136.3, 130.0, 128.2, 128.0, 126.5, 118.8, 118.6, 118.5, 109.0, 47.3, 45.1, 40.7, 36.8, 21.8, 18.8; **IR** (thin film):  $\nu$  3033, 2973, 2925, 2370, 2335, 1637, 1436 cm<sup>-1</sup>; **HRMS** (ESI) (m/z): [M-H]<sup>-</sup> calculated for C<sub>21</sub>H<sub>22</sub>O<sub>2</sub>, 305.1547; found, 305.1548; **mp** = 58-60 °C; [ $\alpha$ ]<sub>D</sub><sup>22</sup> -28.0 ° (c0.5, CH<sub>2</sub>Cl<sub>2</sub>). **(1*R*,2*R*,3*R*) Diastereomer (minor):** <sup>1</sup>H NMR (500 MHz, CDCl<sub>3</sub>):  $\delta$  12.38 (s, 1H), 7.54 (dd,  $J = 8.0, 1.5$  Hz, 1H), 7.42 (ddd,  $J = 8.8, 7.4, 1.8$  Hz, 1H), 7.26-7.30 (m, 3H), 7.20-7.25 (m, 2H), 6.97 (dd,  $J = 8.5, 1.0$  Hz, 1H), 6.79 (ddd,  $J = 8.0, 7.2, 1.2$  Hz, 1H), 5.01 (s, 1H), 4.94 (m, 1H), 4.13 (q,  $J = 8.5$  Hz, 1H), 3.70 (d,  $J = 8.5$  Hz, 1H), 2.80 (dd,  $J = 11.9, 9.5$  Hz, 1H), 2.28 (dd,  $J = 11.9, 8.5$  Hz, 1H), 1.41 (s, 3H), 1.11 (s, 3H); <sup>13</sup>C NMR (126 MHz, CDCl<sub>3</sub>):  $\delta$  206.4, 162.7, 148.0, 140.0, 136.2, 130.1, 128.2, 127.9, 126.8, 118.8, 118.5, 118.4, 110.9, 52.7, 46.9, 42.0, 34.1, 28.6, 20.1; **IR** (thin film):  $\nu$  3034, 2964, 2920, 2362, 2340, 1633 cm<sup>-1</sup>; **HRMS** (ESI) (m/z): [M-H]<sup>-</sup> calculated for C<sub>21</sub>H<sub>22</sub>O<sub>2</sub>, 305.1547; found, 305.1548; **mp** = 55-57 °C; [ $\alpha$ ]<sub>D</sub><sup>22</sup> -45.4 ° (c0.5, CH<sub>2</sub>Cl<sub>2</sub>).

**((1*R*,2*R*,3*S*)-2-(4-Bromophenyl)-3-methyl-3-(prop-1-en-2-yl)cyclobutyl)(2-hydroxyphenyl)methanone** (Figure 2, 9). **Experiment 1:** Prepared according to general

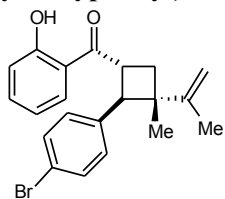

procedure A using 121.3 mg (0.40 mmol) (*E*)-3-(4-bromophenyl)-1-(2-hydroxyphenyl)prop-2-en-1-one, 19.2 mg (0.04 mmol) Sc(OTf)<sub>3</sub>, 20.0 mg (0.06 mmol) (*S,S*)-*t*-BuPyBox, 8.7 mg (0.01 mmol) Ru(bpy)<sub>3</sub>(PF<sub>6</sub>)<sub>2</sub>, 12 mL (3:1) *i*-PrOAc:MeCN, 450  $\mu$ L (4.0 mmol) 2,3-dimethylbutadiene, and an irradiation time of 20 h. The crude material resulted in a 3:1 (major:minor) mixture of diastereomers that was purified by flash-column chromatography on silica gel (2.5% EtOAc:Hex). Combined yield: 130 mg of a clear oil (84%, 0.34 mmol) as a 3:1 (major:minor) mixture of diastereomers; 94% ee (Daicel CHIRALPAK<sup>®</sup> OD-H, 3% MeOH, 3 mL/min, 248 nm;  $t_1 = 12.4$  min,  $t_2 = 15.2$  min). Characterization data was obtained for the major diastereomer by flash-column chromatography (1-2.5% EtOAc:Hex). **Experiment 2:** 121.3 mg (0.40 mmol) (*E*)-3-(4-bromophenyl)-1-(2-hydroxyphenyl)prop-2-en-1-one, 19.2 mg (0.04 mmol) Sc(OTf)<sub>3</sub>, 20.0 mg (0.06 mmol) (*S,S*)-*t*-BuPyBox, 8.7 mg (0.01 mmol) Ru(bpy)<sub>3</sub>(PF<sub>6</sub>)<sub>2</sub>, 12 mL (3:1) *i*-PrOAc:MeCN, 450  $\mu$ L (4.0 mmol) 2,3-dimethylbutadiene. Crude d.r.: 3:1; Combined isolated yield: 124 mg of a clear oil (80%, 0.32 mmol); 94% ee.

<sup>1</sup>H NMR (500 MHz, CDCl<sub>3</sub>):  $\delta$  12.28 (s, 1H), 7.70 (dd,  $J = 8.0, 1.7$  Hz, 1H), 7.47 (ddd,  $J = 8.3, 7.7, 1.7$  Hz, 1H), 7.43 (d,  $J = 8.3$  Hz, 2H), 7.09 (d,  $J = 8.3$  Hz, 2H), 6.99 (dd,  $J = 8.4, 1.1$  Hz, 1H),



6.88 (ddd,  $J = 8.3, 7.6, 1.3$  Hz, 1H), 4.88 (s, 1H), 4.84 (m, 1H), 4.18 (q,  $J = 9$  Hz, 1H), 4.15 (d,  $J = 9.5$  Hz, 1H), 2.37 (dd,  $J = 10.9, 9.2$  Hz, 1H), 2.25 (dd,  $J = 10.9, 8.8$  Hz, 1H), 1.74 (s, 3H), 1.15 (s, 3H);  $^{13}\text{C}$  NMR (126 MHz,  $\text{CDCl}_3$ ):  $\delta$  205.9, 162.8, 151.8, 138.6, 136.4, 131.3, 129.8, 129.7, 120.4, 118.9, 118.7, 118.3, 109.2, 46.5, 45.0, 40.8, 37.0, 21.7, 18.8; IR (thin film):  $\nu$  2967, 2923, 1633, 1484, 1239  $\text{cm}^{-1}$ ; HRMS (ESI) ( $m/z$ ):  $[\text{M}-\text{H}]^-$  calculated for  $\text{C}_{21}\text{H}_{21}\text{BrO}_2$ , 383.0652; found, 383.0657;  $[\alpha]_D^{22} -47.3^\circ$  ( $c$ 1.0,  $\text{CH}_2\text{Cl}_2$ ).

**((1R,2R,3S)-2-(3-Bromophenyl)-3-methyl-3-(prop-1-en-2-yl)cyclobutyl)(2-**

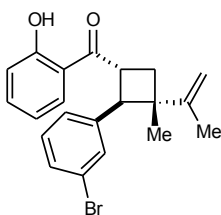

**hydroxyphenyl)methanone** (Figure 2, 10). Experiment 1: Prepared according to general procedure A using 121.3 mg (0.40 mmol) (*E*)-3-(3-bromophenyl)-1-(2-hydroxyphenyl)prop-2-en-1-one, 19.2 mg (0.04 mmol)  $\text{Sc}(\text{OTf})_3$ , 20.0 mg (0.06 mmol) (*S,S*)-*t*-BuPyBox, 8.7 mg (0.01 mmol)  $\text{Ru}(\text{bpy})_3(\text{PF}_6)_2$ , 12 mL (3:1) *i*-PrOAc:MeCN, 450  $\mu\text{L}$  (4.0 mmol) 2,3-dimethylbutadiene, and an irradiation time of 20 h. The crude material

resulted in a 3:1 (major:minor) mixture of diastereomers that was purified by flash-column chromatography on silica gel (1.0% EtOAc:Hex). Combined yield: 113 mg of a clear oil (73%, 0.29 mmol) as a 3:1 (major:minor) mixture of diastereomers; 93% ee (Daicel CHIRALPAK<sup>®</sup> OJ-H, 8% solvent, 3 mL/min, 245 nm;  $t_1 = 4.1$  min,  $t_2 = 4.6$  min). Characterization data was obtained for the major diastereomer by flash-column chromatography (1.0% EtOAc:Hex). Experiment 2: 121.3 mg (0.40 mmol) (*E*)-3-(3-bromophenyl)-1-(2-hydroxyphenyl)prop-2-en-1-one, 19.2 mg (0.04 mmol)  $\text{Sc}(\text{OTf})_3$ , 20.0 mg (0.06 mmol) (*S,S*)-*t*-BuPyBox, 8.7 mg (0.01 mmol)  $\text{Ru}(\text{bpy})_3(\text{PF}_6)_2$ , 12 mL (3:1) *i*-PrOAc:MeCN, 450  $\mu\text{L}$  (4.0 mmol) 2,3-dimethylbutadiene. Crude d.r.: 3:1; Combined isolated yield: 110 mg of a clear oil (71%, 0.28 mmol); 93% ee.

$^1\text{H}$  NMR (500 MHz,  $\text{CDCl}_3$ ):  $\delta$  12.27 (s, 1H), 7.71 (dd,  $J = 7.7, 1.8$  Hz, 1H), 7.47 (ddd,  $J = 8.7, 7.9, 1.9$  Hz, 1H), 7.33-7.37 (m, 2H), 7.17 (q,  $J = 7.5$  Hz, 1H), 7.13-7.16 (m, 1H), 7.00 (dd,  $J = 8.3, 1.2$  Hz, 1H), 6.89 (t,  $J = 7.7$  Hz, 1H), 4.89 (s, 1H), 4.86 (m, 1H), 4.19-4.23 (m, 1H), 4.17 (d,  $J = 9.4$  Hz, 1H), 2.32-2.38 (m, 1H), 2.24-2.29 (m, 1H), 1.75 (s, 3H), 1.15 (s, 3H);  $^{13}\text{C}$  NMR (126 MHz,  $\text{CDCl}_3$ ):  $\delta$  205.8, 162.8, 151.7, 142.1, 136.5, 130.8, 129.9, 129.8, 129.6, 126.7, 122.5, 118.9, 118.7, 118.3, 109.4, 46.3, 45.2, 40.8, 37.2, 21.7, 18.8; IR (thin film):  $\nu$  2953, 2920, 2856, 2366, 1633, 1455  $\text{cm}^{-1}$ ; HRMS (ESI) ( $m/z$ ):  $[\text{M}-\text{H}]^-$  calculated for  $\text{C}_{21}\text{H}_{21}\text{BrO}_2$ , 383.0652; found, 383.0655;  $[\alpha]_D^{22} -21.6^\circ$  ( $c$ 1.0,  $\text{CH}_2\text{Cl}_2$ ).

**((1R,2S,3S)-2-(2-Chlorophenyl)-3-methyl-3-(prop-1-en-2-yl)cyclobutyl)(2-**

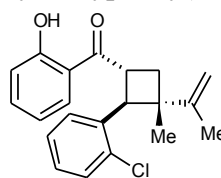

**hydroxyphenyl)methanone** (Figure 2, 11). Experiment 1: Prepared according to general procedure A using 103.5 mg (0.40 mmol) (*E*)-3-(2-chlorophenyl)-1-(2-hydroxyphenyl)prop-2-en-1-one, 19.2 mg (0.04 mmol)  $\text{Sc}(\text{OTf})_3$ , 20.0 mg (0.06 mmol) (*S,S*)-*t*-BuPyBox, 8.7 mg (0.01 mmol)  $\text{Ru}(\text{bpy})_3(\text{PF}_6)_2$ , 12 mL (3:1) *i*-PrOAc:MeCN, 450  $\mu\text{L}$  (4.0 mmol) 2,3-dimethylbutadiene, and an irradiation time of 20 h. The crude material resulted in a 2:1 (major:minor)

mixture of inseparable diastereomers that was purified by flash-column chromatography on silica gel (1-2.5% EtOAc:Hex). Combined yield: 88.0 mg of a clear oil (64%, 0.26 mmol) as a 2:1 (major:minor) mixture of diastereomers; 98% ee (Daicel CHIRALPAK<sup>®</sup> OJ-H, 8% *i*-PrOH, 4 mL/min, 250 nm;  $t_1 = 3.2$  min,  $t_2 = 3.4$  min). Characterization data was obtained for the major diastereomer by flash-column chromatography (1.0 - 2.5% EtOAc:Hex), while data for the minor diastereomer was obtained by iterative prep TLC (20% acetone:Hex). Experiment 2: 103.5 mg (0.40 mmol) (*E*)-3-(2-chlorophenyl)-1-(2-hydroxyphenyl)prop-2-en-1-one, 19.2 mg (0.04 mmol)  $\text{Sc}(\text{OTf})_3$ , 20.0 mg (0.06 mmol) (*S,S*)-*t*-BuPyBox, 8.7 mg (0.01 mmol)

Ru(bpy)<sub>3</sub>(PF<sub>6</sub>)<sub>2</sub>, 12 mL (3:1) *i*-PrOAc:MeCN, 450 μL (4.0 mmol) 2,3-dimethylbutadiene. Crude d.r.: 2:1; Combined isolated yield: 84.5 mg of a clear oil (62%, 0.25 mmol); 98% ee.

**(1*R*,2*S*,3*S*) Diastereomer** (major): <sup>1</sup>H NMR (500 MHz, CDCl<sub>3</sub>): δ 12.29 (s, 1H), 7.65 (dd, *J* = 8.0, 1.9 Hz, 1H), 7.44 (ddd, *J* = 8.7, 7.2, 1.8 Hz, 1H), 7.41 (dd, *J* = 8.0, 2.0 Hz, 1H), 7.36 (dd, *J* = 7.7, 1.8 Hz, 1H), 7.26 (td, *J* = 7.5, 1.3 Hz, 1H), 7.17 (td, *J* = 7.5, 1.8 Hz, 1H), 6.97 (dd, *J* = 8.4, 1.0 Hz, 1H), 6.84 (ddd, *J* = 8.4, 7.5, 1.1 Hz, 1H), 4.81 (s, 1H), 4.80 (m, 1H), 4.60 (d, *J* = 9.8 Hz, 1H), 4.29 (q, *J* = 9.6 Hz, 1H), 2.59 (t, *J* = 10.4 Hz, 1H), 2.16 (dd, *J* = 11.1, 9.8 Hz, 1H), 1.83 (s, 3H), 1.22 (s, 3H); <sup>13</sup>C NMR (126 MHz, CDCl<sub>3</sub>): δ 205.6, 162.7, 151.0, 136.6, 136.3, 134.7, 130.0, 129.8, 129.3, 127.9, 126.3, 118.8, 118.6, 118.4, 109.5, 45.4, 44.3, 41.2, 35.4, 21.8, 19.2; **IR** (thin film): ν 2964, 2920, 2361, 2336, 1633 cm<sup>-1</sup>; **HRMS** (ESI) (*m/z*): [M-H]<sup>-</sup> calculated for C<sub>21</sub>H<sub>21</sub>ClO<sub>2</sub>, 339.1157; found, 339.1159; [α]<sub>D</sub><sup>22</sup> - 52.1 ° (*c*1.0, CH<sub>2</sub>Cl<sub>2</sub>). **(1*R*,2*S*,3*R*) Diastereomer** (minor): <sup>1</sup>H NMR (500 MHz, CDCl<sub>3</sub>): δ 12.32 (s, 1H), 7.59 (dd, *J* = 8.1, 1.9 Hz, 1H), 7.45 (ddd, *J* = 8.8, 7.7, 2.3 Hz, 1H), 7.35 (dd, *J* = 7.7, 1.2 Hz, 1H), 7.29 (dd, *J* = 7.9, 1.9 Hz, 1H), 7.21 (td, *J* = 7.5, 1.7 Hz, 1H), 7.15 (td, *J* = 8.2, 1.7 Hz, 1H), 6.97 (dd, *J* = 8.5, 1.2 Hz, 1H), 6.84 (ddd, *J* = 8.2, 7.7, 1.2 Hz, 1H), 5.04 (s, 1H), 4.94 (m, 1H), 4.40 (d, *J* = 8.7 Hz, 1H), 4.15 (q, *J* = 9.1 Hz, 1H), 2.82 (dd, *J* = 11.3, 9.5 Hz, 1H), 2.25 (dd, *J* = 11.3, 9.1 Hz, 1H), 1.51 (s, 3H), 1.11 (s, 3H); <sup>13</sup>C NMR (126 MHz, CDCl<sub>3</sub>): δ 205.8, 162.8, 147.5, 137.5, 136.3, 134.7, 129.8, 129.3, 128.3, 127.8, 126.6, 118.8, 118.6, 118.3, 110.6, 48.0, 47.1, 41.0, 34.5, 28.8, 19.8; **IR** (thin film): ν 2968, 2924, 2357, 2340, 1629 cm<sup>-1</sup>; **HRMS** (ESI) (*m/z*): [M-H]<sup>-</sup> calculated for C<sub>21</sub>H<sub>21</sub>ClO<sub>2</sub>, 339.1157; found, 339.1158; [α]<sub>D</sub><sup>22</sup> - 32.8 ° (*c*1.0, CH<sub>2</sub>Cl<sub>2</sub>).

**(5-Chloro-2-hydroxyphenyl)((1*R*,2*R*,3*S*)-3-methyl-2-phenyl-3-(prop-1-en-2-**

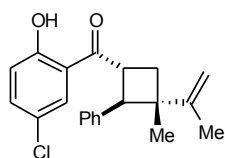

**yl)cyclobutyl)methanone** (Figure 2, **15**). **Experiment 1:** Prepared according to general procedure A using 103.5 mg (0.40 mmol) (*E*)-1-(5-chloro-2-hydroxyphenyl)-3-phenylprop-2-en-1-one, 19.2 mg (0.04 mmol) Sc(OTf)<sub>3</sub>, 20.0 mg (0.06 mmol) (*S,S*)-*t*-BuPyBox, 8.7 mg (0.01 mmol) Ru(bpy)<sub>3</sub>(PF<sub>6</sub>)<sub>2</sub>, 12 mL (3:1) *i*-PrOAc:MeCN, 450 μL (4.0 mmol) 2,3-dimethylbutadiene, and an irradiation time of 20 h. The crude material

resulted in a 2.2:1 (major:minor) mixture of inseparable diastereomers that was purified by flash-column chromatography on silica gel (2.5% EtOAc:Hex). Combined yield: 120 mg of a clear oil (88%, 0.35 mmol) as a 2:1 (major:minor) mixture of diastereomers; 88% ee (Daicel CHIRALPAK<sup>®</sup> OD-H, gradient 5 - 50% MeOH, 3 mL/min, 248 nm; *t*<sub>1</sub> = 4.5 min, *t*<sub>2</sub> = 4.9 min). Characterization data was obtained for the major diastereomer by flash-column chromatography (2.5% EtOAc:Hex). **Experiment 2:** 103.5 mg (0.40 mmol) (*E*)-1-(5-chloro-2-hydroxyphenyl)-3-phenylprop-2-en-1-one, 19.2 mg (0.04 mmol) Sc(OTf)<sub>3</sub>, 20.0 mg (0.06 mmol) (*S,S*)-*t*-BuPyBox, 8.7 mg (0.01 mmol) Ru(bpy)<sub>3</sub>(PF<sub>6</sub>)<sub>2</sub>, 12 mL (3:1) *i*-PrOAc:MeCN, 450 μL (4.0 mmol) 2,3-dimethylbutadiene. Crude d.r.: 2:1; Combined isolated yield: 113.0 mg of a clear oil (83%, 0.33 mmol); 89% ee.

<sup>1</sup>H NMR (500 MHz, CDCl<sub>3</sub>): δ 12.23 (s, 1H), 7.62 (d, *J* = 2.7 Hz, 1H), 7.39 (dd, *J* = 8.7, 7.5 Hz, 1H), 7.31-7.34 (m, 2H), 7.22-7.26 (m, 3H), 6.93 (d, *J* = 8.8 Hz, 1H), 4.90 (s, 1H), 4.84 (p, *J* = 1.4 Hz, 1H), 4.17 (q, *J* = 9.4 Hz, 1H), 4.14 (d, *J* = 9.4 Hz, 1H), 2.41 (t, *J* = 9.4 Hz, 1H), 2.24 (dd, *J* = 10.5, 8.1 Hz, 1H), 1.74 (s, 3H), 1.18 (s, 3H); <sup>13</sup>C NMR (126 MHz, CDCl<sub>3</sub>): δ 205.5, 161.2, 152.2, 139.1, 136.2, 129.2, 128.3, 128.1, 126.7, 123.5, 120.2, 119.0, 109.0, 47.7, 45.2, 40.1, 36.5, 21.8, 18.8; **IR** (thin film): ν 3029, 2925, 2366, 2336, 1633, 1607, 1275 cm<sup>-1</sup>; **HRMS** (ESI) (*m/z*): [M-H]<sup>-</sup> calculated for C<sub>21</sub>H<sub>21</sub>ClO<sub>2</sub>, 339.1157; found, 339.1158; [α]<sub>D</sub><sup>22</sup> - 15.9 ° (*c*0.9, CH<sub>2</sub>Cl<sub>2</sub>).

**(2-Hydroxy-4-methylphenyl)((1R,2R,3S)-3-methyl-2-phenyl-3-(prop-1-en-2-yl)cyclobutyl)methanone** (Figure 2, 16).

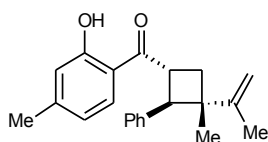

**Experiment 1:** Prepared according to general procedure A using 95.3 mg (0.40 mmol) (*E*)-1-(2-hydroxy-4-methylphenyl)-3-phenylprop-2-en-1-one, 19.2 mg (0.04 mmol) Sc(OTf)<sub>3</sub>, 20.0 mg (0.06 mmol) (*S,S*)-*t*-BuPyBox, 8.7 mg (0.01 mmol) Ru(bpy)<sub>3</sub>(PF<sub>6</sub>)<sub>2</sub>, 12 mL (3:1) *i*-PrOAc:MeCN, 450 μL (4.0 mmol) 2,3-dimethylbutadiene, and an irradiation time of 20 h. The crude material resulted in a 2:1 (major:minor) mixture of inseparable diastereomers that was purified by flash-column chromatography on silica gel (conditions). Combined yield: 112 mg of a clear oil (88%, 0.34 mmol) as a 2:1 (major:minor) mixture of diastereomers; 83% ee (Daicel CHIRALPAK® OD-H, 4% *i*-PrOH, 5 mL/min, 255 nm; t<sub>1</sub> = 4.2 min, t<sub>2</sub> = 4.9 min). Characterization data was obtained for the major diastereomer (white solid) by flash-column chromatography (conditions). **Experiment 2:** 95.3 mg (0.40 mmol) (*E*)-1-(2-hydroxy-4-methylphenyl)-3-phenylprop-2-en-1-one, 19.2 mg (0.04 mmol) Sc(OTf)<sub>3</sub>, 20.0 mg (0.06 mmol) (*S,S*)-*t*-BuPyBox, 8.7 mg (0.01 mmol) Ru(bpy)<sub>3</sub>(PF<sub>6</sub>)<sub>2</sub>, 12 mL (3:1) *i*-PrOAc:MeCN, 450 μL (4.0 mmol) 2,3-dimethylbutadiene. Crude d.r.: 2:1; Combined isolated yield: 106.5 mg of a clear oil (83%, 0.33 mmol); 83% ee.

**<sup>1</sup>H NMR** (500 MHz, CDCl<sub>3</sub>): δ 12.38 (s, 1H), 7.59 (d, *J* = 7.9 Hz, 1H), 7.28-7.32 (m, 2H), 7.22 (d, *J* = 7.7 Hz, 3H), 6.78 (s, 1H), 6.66 (dd, *J* = 8.0, 1.5 Hz, 1H), 4.9 (s, 1H), 4.83 (p, *J* = 1.4 Hz, 1H), 4.22 (q, *J* = 9.2 Hz, 1H), 4.17 (d, *J* = 10.0 Hz, 1H), 2.38 (t, *J* = 9.7 Hz, 1H), 2.33 (s, 3H), 2.20 (dd, *J* = 10.5, 8.3 Hz, 1H), 1.75 (s, 3H), 1.16 (s, 3H); **<sup>13</sup>C NMR** (126 MHz, CDCl<sub>3</sub>): δ 205.6, 162.9, 152.3, 147.9, 139.6, 129.8, 128.2, 128.0, 126.5, 120.1, 118.6, 116.3, 109.0, 47.4, 45.1, 40.5, 36.7, 22.0, 21.8, 18.8; **IR** (thin film): ν 2962, 1635, 1503, 1448, 1242 cm<sup>-1</sup>; **HRMS** (ESI<sup>+</sup>) (*m/z*): [M-H]<sup>+</sup> calculated for C<sub>22</sub>H<sub>24</sub>O<sub>2</sub>, 319.1704; found, 319.1705; **mp** = 63-65 °C; [α]<sub>D</sub><sup>22</sup> -49.1 ° (c1.0, CH<sub>2</sub>Cl<sub>2</sub>).

**(2-Hydroxyphenyl)((1R,2R,3R)-2-phenyl-3-vinylcyclobutyl)methanone** (Figure 2, 17).

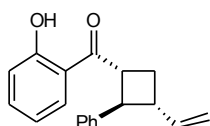

**Experiment 1:** Prepared according to general procedure A using 89.6 mg (0.400 mmol) (*E*)-1-(2-hydroxyphenyl)-3-phenylprop-2-en-1-one, 19.2 mg (0.04 mmol) Sc(OTf)<sub>3</sub>, 20.0 mg (0.06 mmol) (*S,S*)-*t*-BuPyBox, 8.7 mg (0.01 mmol) Ru(bpy)<sub>3</sub>(PF<sub>6</sub>)<sub>2</sub>, 12 mL (3:1) *i*-PrOAc:MeCN, 268 μL (4.0 mmol) 2,3-butadiene, and an irradiation time of 20 h. The crude material resulted in a 1.5:1 (major:minor) mixture of inseparable diastereomers that was purified by flash-column chromatography on silica gel (1-2.5% EtOAc:Hex). Combined yield: 57.0 mg of a clear oil (51%, 0.20 mmol) as a 2:1 (major:minor) mixture of diastereomers; 91% ee (Daicel CHIRALPAK® OJ-H, 5% MeOH, 5 mL/min, 245 nm; t<sub>1</sub> = 2.5 min, t<sub>2</sub> = 3.1 min). **Experiment 2:** 89.6 mg (0.400 mmol) (*E*)-1-(2-hydroxyphenyl)-3-phenylprop-2-en-1-one, 19.2 mg (0.04 mmol) Sc(OTf)<sub>3</sub>, 20.0 mg (0.06 mmol) (*S,S*)-*t*-BuPyBox, 8.7 mg (0.01 mmol) Ru(bpy)<sub>3</sub>(PF<sub>6</sub>)<sub>2</sub>, 12 mL (3:1) *i*-PrOAc:MeCN, 268 μL (4.0 mmol) 2,3-butadiene. Crude d.r.: 2:1; Combined isolated yield: 48.0 mg of a clear oil (43%, 0.17 mmol); 91% ee. **Experiment 3:** 89.6 mg (0.400 mmol) (*E*)-1-(2-hydroxyphenyl)-3-phenylprop-2-en-1-one, 19.2 mg (0.04 mmol) Sc(OTf)<sub>3</sub>, 20.0 mg (0.06 mmol) (*S,S*)-*t*-BuPyBox, 8.7 mg (0.01 mmol) Ru(bpy)<sub>3</sub>(PF<sub>6</sub>)<sub>2</sub>, 12 mL (3:1) *i*-PrOAc:MeCN, 268 μL (4.0 mmol) 2,3-butadiene, and an irradiation time of 40 h. Crude d.r.: 2:1; Combined isolated yield: 89.1 mg of a clear oil (80%, 0.32 mmol); 92% ee. **Experiment 4:** 89.6 mg (0.400 mmol) (*E*)-1-(2-hydroxyphenyl)-3-phenylprop-2-en-1-one, 19.2 mg (0.04 mmol) Sc(OTf)<sub>3</sub>, 20.0 mg (0.06 mmol) (*S,S*)-*t*-BuPyBox, 8.7 mg (0.01 mmol) Ru(bpy)<sub>3</sub>(PF<sub>6</sub>)<sub>2</sub>, 12 mL (3:1) *i*-PrOAc:MeCN, 268 μL (4.0 mmol) 2,3-butadiene, and an irradiation time of 40 h. Crude d.r.: 2:1; Combined isolated yield: 90.0 mg of a clear oil (81%, 0.32 mmol); 92% ee.

**(1R,2R,3R) Diastereomer** (major) and **(1R,2R,3S) diastereomer** (minor) as a mixture: **<sup>1</sup>H NMR** (500 MHz, CDCl<sub>3</sub>): δ 12.38 (s, 0.54H), 12.36 (s, 0.34H), 7.60 (dd, *J* = 8.0, 1.6 Hz, 0.40H), 7.50

(dd,  $J = 8.0, 1.6$  Hz, 0.66H), 7.46 (ddd,  $J = 8.5, 0.46$ H), 7.43 (ddd,  $J = 8.5, 7.6, 1.6$  Hz, 0.66H), 7.31 (t,  $J = 7.2$  Hz, 2H), 7.19-7.25 (m, 1.5H), 7.16 (d,  $J = 7.9$  Hz, 0.78H), 6.98 (ddd,  $J = 9.7, 8.4, 1.1$  Hz, 1H) 6.83(ddd,  $J = 8.2, 7.3, 1.1$  Hz, 0.44H), 6.77(ddd,  $J = 8.2, 7.1, 1.1$  Hz, 0.6H), 5.98 (ddd,  $J = 17.1, 10.3, 6.8$  Hz, 0.66H), 5.73 (ddd,  $J = 17.1, 10.3, 7.8$  Hz, 0.40Hz), 5.13 (m, 0.29H), 5.09 (s, 0.48H), 5.05 (dt,  $J = 10.2, 1.5$  Hz, 0.74H), 5.02 (dt,  $J = 10.2, 1.5$  Hz, 0.40H), 4.36 (q,  $J = 8.4$  Hz, 0.44H), 4.23 (t,  $J = 8.8$  Hz, 0.43H), 3.95 (q,  $J = 8.7$  Hz, 0.65H), 3.78 (t,  $J = 9.6$  Hz, 0.60H), 3.33-3.40 (qdd,  $J = 4.3, 3.8, 1.2$  Hz, 0.40H), 3.16 (tdt,  $J = 9.4, 7.9, 6.7, 1.2$  Hz, 0.64H), 2.67 (dt,  $J = 11.5, 8.4$  Hz, 0.43H), 2.57 (dt,  $J = 10.9, 8.5$  Hz, 0.69H), 2.39 (ddd,  $J = 11.4, 9.2, 4.0$  Hz, 0.46H), 2.22 (q,  $J = 10.2$  Hz, 0.69H);  $^{13}\text{C}$  NMR (126 MHz,  $\text{CDCl}_3$ ):  $\delta$  206.1, 205.6, 162.81, 162.80, 142.1, 140.2, 139.5, 138.5, 136.33, 136.31, 130.1, 130.0, 128.2, 127.8, 126.9, 126.8, 126.7, 126.5, 118.9, 118.8, 118.6, 118.4, 115.5, 115.0, 47.5, 46.0, 44.4, 44.2, 41.8, 39.9, 29.9, 28.7; IR (thin film):  $\nu$  2950, 2361, 2335, 1646, 1607, 1493, 1441, 1280  $\text{cm}^{-1}$ ; HRMS (ESI) (m/z):  $[\text{M}-\text{H}]^-$  calculated for  $\text{C}_{19}\text{H}_{18}\text{O}_2$ , 277.1234; found, 277.1232;  $[\alpha]_D^{22} - 36.4^\circ$  (c0.5,  $\text{CH}_2\text{Cl}_2$ ).

### (2-Hydroxyphenyl)((1R,2R,3R)-2-phenyl-3-((E)-prop-1-en-1-yl)cyclobutyl)methanone

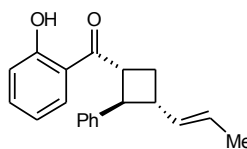

(Figure 2, **18**). Experiment 1: Prepared according to general procedure A using 89.6 mg (0.400 mmol) (*E*)-1-(2-hydroxyphenyl)-3-phenylprop-2-en-1-one, 19.2 mg (0.04 mmol)  $\text{Sc}(\text{OTf})_3$ , 20.0 mg (0.06 mmol) (*S,S*)-*t*-BuPyBox, 8.7 mg (0.01 mmol)  $\text{Ru}(\text{bpy})_3(\text{PF}_6)_2$ , 12 mL (3:1) *i*-PrOAc:MeCN, 399  $\mu\text{L}$  (4.0 mmol) 2,3-*trans*-pentadiene, and an irradiation time of 20 h. The crude material resulted in a 2:1 (major:minor) mixture of inseparable diastereomers that was purified by flash-column chromatography on silica gel (1-2.5% EtOAc:Hex). Combined yield: 100 mg of a clear oil (86%, 0.34 mmol) as a 2:1 (major:minor) mixture of diastereomers; 92% ee (Daicel CHIRALPAK<sup>®</sup> AD-H, gradient 1-6% (*i*-PrOH:Hex), Shimadzu HPLC, 0.4 mL/min, 265 nm;  $t_1 = 15.5$  min,  $t_2 = 17.4$  min). Experiment 2: 89.6 mg (0.400 mmol) (*E*)-1-(2-hydroxyphenyl)-3-phenylprop-2-en-1-one, 19.2 mg (0.04 mmol)  $\text{Sc}(\text{OTf})_3$ , 20.0 mg (0.06 mmol) (*S,S*)-*t*-BuPyBox, 8.7 mg (0.01 mmol)  $\text{Ru}(\text{bpy})_3(\text{PF}_6)_2$ , 12 mL (3:1) *i*-PrOAc:MeCN, 399  $\mu\text{L}$  (4.0 mmol) 2,3-*trans*-pentadiene. Crude d.r.: 2:1; Combined isolated yield: 95.0 mg of a clear oil (81%, 0.32 mmol); 92% ee.

**(1R,2R,3R)** Diastereomer (major) and **(1R,2R,3S)** diastereomer (minor) as a mixture:  $^1\text{H}$  NMR (500 MHz,  $\text{CDCl}_3$ ):  $\delta$  12.41 (s, 0.60H), 12.39 (s, 0.42H), 7.60 (dd,  $J = 8.1, 1.5$  Hz, 0.43H), 7.49 (dd,  $J = 8.1, 1.5$  Hz, 0.64H), 7.45 (ddd,  $J = 8.7, 7.9, 1.9$  Hz, 0.40H), 7.42 (ddd,  $J = 8.7, 7.9, 1.9$  Hz, 0.72H), 7.28-7.32 (m, 2H), 7.19-7.24 (m, 1.6H), 7.15 (d,  $J = 7.2$  Hz, 0.87H), 6.98 (ddd,  $J = 10.1, 8.8, 1.0$  Hz, 1H), 6.83 (ddd,  $J = 8.1, 7.4, 1.1$  Hz, 0.42H), 6.77 (ddd,  $J = 8.1, 7.4, 1.1$  Hz, 0.62H), 5.59 (ddq,  $J = 15.4, 1.3, 1.2$  Hz, 0.62H), 5.52 (dq,  $J = 15.4, 6.1$  Hz, 0.54H), 5.47 (dq,  $J = 15.4, 6.3, 1.1$  Hz, 0.53H), 5.35 (ddq,  $J = 15.5, 8.0, 1.2$  Hz, 0.43H), 4.33 (q,  $J = 8.8$  Hz, 0.44H), 4.17 (t,  $J = 8.8$  Hz, 0.42H), 3.91 (q,  $J = 9.4$  Hz, 0.62H), 3.73 (t,  $J = 9.4$  Hz, 0.62H), 3.31 (qdd,  $J = 4.6, 4.0, 1.3$  Hz, 0.42H), 3.10 (quint,  $J = 8.1$  Hz, 0.62H), 2.64 (dt,  $J = 11.4, 8.0$  Hz, 0.42H), 2.53 (dt,  $J = 10.7, 8.4$  Hz, 0.62H), 2.31 (ddd,  $J = 11.2, 9.3, 4$  Hz, 0.44H), 2.16 (q,  $J = 10.5$  Hz, 0.66H), 1.67 (d,  $J = 6.2$  Hz, 1.82H), 1.58 (d,  $J = 6.3$  Hz, 1.25H);  $^{13}\text{C}$  NMR (126 MHz,  $\text{CDCl}_3$ ) 206.3, 205.8, 162.79, 162.76, 142.3, 139.9, 136.3, 133.3, 131.2, 130.1, 130.0, 128.52, 128.50, 128.1, 127.8, 126.8, 126.6, 126.27, 126.26, 125.7, 118.9, 118.5, 118.5, 118.4, 118.3, 47.9, 46.0, 44.7, 44.4, 41.0, 39.1, 30.1, 29.6, 17.91, 17.90, IR (thin film):  $\nu$  3038, 2938, 2362, 2331, 1633, 1480, 1210  $\text{cm}^{-1}$ ; HRMS (ESI) (m/z):  $[\text{M}-\text{H}]^-$  calculated for  $\text{C}_{20}\text{H}_{20}\text{O}_2$ , 291.1391; found, 291.1393;  $[\alpha]_D^{22} - 39.0^\circ$  (c0.5,  $\text{CH}_2\text{Cl}_2$ ).

**(2-Hydroxyphenyl)((1R,2S,3R)-3-methyl-2-phenyl-3-vinylcyclobutyl)methanone** (Figure 2, 19). Experiment 1: Prepared according to general procedure A using 89.6 mg (0.400 mmol) (*E*)-1-(2-hydroxyphenyl)-3-phenylprop-2-en-1-one, 19.2 mg (0.04 mmol) Sc(OTf)<sub>3</sub>, 20.0 mg (0.06 mmol) (*S,S*)-*t*-BuPyBox, 8.7 mg (0.01 mmol) Ru(bpy)<sub>3</sub>(PF<sub>6</sub>)<sub>2</sub>, 12 mL (3:1) *i*-PrOAc:MeCN, 400 μL (4.0 mmol) isoprene, and an irradiation time of 20 h. The crude material resulted in a 2:1 (major:minor) mixture of inseparable diastereomers that was purified by flash-column chromatography on silica gel (1.0-2.5% EtOAc:Hex). Combined yield: 103 mg of a clear oil (88%, 0.35 mmol) as a 2:1 (major:minor) mixture of diastereomers and in 86:14 regioselectivity; 92% ee (Daicel CHIRALPAK® OJ-H, gradient 5-50% (25% *i*-PrOH:Hex), 3 mL/min, 243 nm; t<sub>1</sub> = 4.8 min, t<sub>2</sub> = 5.5 min). Characterization data was obtained for the major diastereomer and regioisomer by flash-column chromatography (1.0-2.5 % EtOAc:Hex). Experiment 2: 89.6 mg (0.400 mmol) (*E*)-1-(2-hydroxyphenyl)-3-phenylprop-2-en-1-one, 19.2 mg (0.04 mmol) Sc(OTf)<sub>3</sub>, 20.0 mg (0.06 mmol) (*S,S*)-*t*-BuPyBox, 8.7 mg (0.01 mmol) Ru(bpy)<sub>3</sub>(PF<sub>6</sub>)<sub>2</sub>, 12 mL (3:1) *i*-PrOAc:MeCN, 400 μL (4.0 mmol) isoprene. Crude d.r.: 2:1; crude r.r.: 86:14; Combined isolated yield: 102 mg of a clear oil (84%, 0.34 mmol); 92% ee.

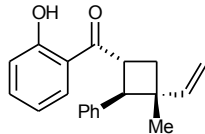

<sup>1</sup>H NMR (500 MHz, CDCl<sub>3</sub>): δ 12.35 (s, 1H), 7.78 (dd, *J* = 8.1, 1.6 Hz, 1H), 7.48 (ddd, *J* = 7.9, 7.0, 1.5 Hz, 1H), 7.27-7.32 (m, 2H), 7.19-7.23 (m, 1H), 7.12 (d, *J* = 7.2 Hz, 2H), 7.00 (dd, *J* = 8.4, 1.2 Hz, 1H), 6.90 (ddd, *J* = 8.4, 7.2, 1.1 Hz, 1H), 6.12 (dd, *J* = 17.6, 10.3 Hz, 1H), 5.08 (m, 1H), 5.05 (dd, *J* = 5.3, 1.1 Hz, 1H), 4.33 (q, *J* = 9.6 Hz, 1H), 4.08 (d, *J* = 9.9 Hz, 1H), 2.35 (t, *J* = 10.6 Hz, 1H), 2.24 (dd, *J* = 10.6, 9.2 Hz, 1H), 1.05 (s, 3H); <sup>13</sup>C NMR (500 MHz, CDCl<sub>3</sub>): δ 206.2, 162.8, 146.8, 139.0, 136.4, 129.9, 128.2, 127.1, 126.5, 118.9, 118.6, 118.5, 111.8, 48.1, 41.9, 40.33, 37.5, 20.5; IR (thin film): ν 2929, 2353, 2336, 1611, 1589 cm<sup>-1</sup>; HRMS (ESI<sup>+</sup>) (*m/z*): [M+H]<sup>+</sup> calculated for C<sub>20</sub>H<sub>20</sub>O<sub>2</sub>, 293.1536; found, 293.1532; [α]<sub>D</sub><sup>22</sup> -31.8° (*c*0.5, CH<sub>2</sub>Cl<sub>2</sub>).

#### General Procedure B for Isolation Scale Asymmetric [2+2] Cycloaddition with Blue LEDs:

In an oven-dried 6 dram vial were combined the 2'-hydroxychalcone (1.0 equiv.), Sc(OTf)<sub>3</sub> (0.10 equiv.), (*S,S*)-*t*-BuPyBox (0.15 equiv.), and Ru(bpy)<sub>3</sub>(PF<sub>6</sub>)<sub>2</sub> (0.025 equiv.). A magnetic stir bar was added, and the contents were dissolved in 3:1 <sup>1</sup>PrOAc:MeCN (12 mL). To the resulting solution was added the diene (10 equiv.) neat by syringe, then the vial was sealed with a Teflon-lined cap and stirred under high-intensity blue LED irradiation for 2 h, when the starting material was consumed as judged by TLC. The reaction mixture was then filtered through a plug of silica (eluting with 5% MeOH/Et<sub>2</sub>O). The filtrate was then concentrated *in vacuo* and the crude material was purified by flash-column chromatography to afford analytically pure material for analysis. The isolated yields reported in Table 2 represent the summation of both major and minor diastereomeric cycloadduct products. Characterization data and enantiomeric excesses are reported for the major isomer.

#### (2-Hydroxyphenyl)((1R,2S,3S)-2-(2-methoxyphenyl)-3-methyl-(prop-1-en-2-yl)cyclobutyl)methanone

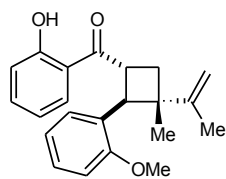

(Figure 2, 12). Experiment 1: Prepared according to general procedure B using 101.7 mg (0.40 mmol) (*E*)-1-(2-hydroxyphenyl)-3-(2-methoxyphenyl)prop-2-en-1-one, 19.2 mg (0.04 mmol) Sc(OTf)<sub>3</sub>, 20.0 mg (0.06 mmol) (*S,S*)-*t*-BuPyBox, 8.7 mg (0.01 mmol) Ru(bpy)<sub>3</sub>(PF<sub>6</sub>)<sub>2</sub>, 12 mL (3:1) *i*-PrOAc:MeCN, 450 μL (4.0 mmol) 2,3-dimethylbutadiene, and an irradiation time of 2 h. The crude material resulted in a 4:1 (major:minor) mixture of inseparable diastereomers that was purified by flash-column chromatography on silica gel (2.5% EtOAc:Hex). Combined yield: 92.1 mg of a clear oil (68%, 0.27 mmol) as a 4:1 (major:minor) mixture of diastereomers; 85% ee (Daicel

CHIRALPAK<sup>®</sup> OJ-H, 5% MeOH, 3 mL/min, 255 nm;  $t_1 = 4.2$  min,  $t_2 = 4.9$  min). **Experiment 2:** 101.7 mg (0.40 mmol) (*E*)-1-(2-hydroxyphenyl)-3-(2-methoxyphenyl)prop-2-en-1-one, 19.2 mg (0.04 mmol) Sc(OTf)<sub>3</sub>, 20.0 mg (0.06 mmol) (*S,S*)-*t*-BuPyBox, 8.7 mg (0.01 mmol) Ru(bpy)<sub>3</sub>(PF<sub>6</sub>)<sub>2</sub>, 12 mL (3:1) *i*-PrOAc:MeCN, 450  $\mu$ L (4.0 mmol) 2,3-dimethylbutadiene. Crude d.r.: 4:1; Combined isolated yield: 87.5 mg of a clear oil (65%, 0.26 mmol); 85% ee.

**(1*R*,2*R*,3*S*) Diastereomer** (major) and **(1*R*,2*R*,3*R*) diastereomer** (minor) as a mixture: <sup>1</sup>H NMR (500 MHz, CDCl<sub>3</sub>):  $\delta$  12.46 (s, 0.68H), 12.43 (s, 0.23H), 7.71 (dd,  $J = 8.0, 1.0$  Hz, 0.76H), 7.65 (dd,  $J = 8.0, 1.0$  Hz, 0.27H), 7.44 (ddd,  $J = 8.6, 7.8, 1.5$  Hz, 1H), 7.24 (m, 0.38H), 7.19 (qd,  $J = 7.6, 1.7$  Hz, 1H), 7.13 (dd,  $J = 7.5, 1.6$  Hz, 0.27H), 6.98 (dd,  $J = 8.5, 1.2$  Hz, 0.75H), 6.96 (dd,  $J = 8.5, 1.2$  Hz, 0.25H), 6.93 (td,  $J = 7.5, 1.1$  Hz, 0.74H), 6.88 (td,  $J = 7.5, 1.1$  Hz, 0.27H), 6.80-6.86 (m, 2H), 4.95 (s, 0.26H), 4.86 (m, 1H), 4.78 (quint,  $J = 1.4$  Hz, 0.73H), 4.48 (d,  $J = 9.8$  Hz, 0.71H), 4.32 (q,  $J = 9.4$  Hz, 0.75H), 4.25 (d,  $J = 9.0$  Hz, 0.27H), 4.20 (q,  $J = 9.4$  Hz, 0.28H), 3.80 (s, 0.74H), 3.65 (s, 2.19H), 2.76 (dd,  $J = 11.1, 8.9$  Hz, 0.27H), 2.46 (t,  $J = 10.0$  Hz, 0.74H), 2.20 (dd,  $J = 11.5, 8.7$  Hz, 0.30H), 2.12 (dd,  $J = 11.2, 9.4$  Hz, 0.74H), 1.79 (s, 2.21H), 1.46 (s, 0.79H), 1.20 (s, 2.18H), 1.17 (s, 0.81H); <sup>13</sup>C NMR (126 MHz, CDCl<sub>3</sub>):  $\delta$  206.7, 206.6, 162.73, 162.71, 157.62, 157.57, 152.1, 148.2, 138.4, 136.1, 136.0, 130.03, 130.00, 128.6, 128.4, 127.7, 127.6, 127.5, 127.4, 120.2, 120.0, 118.8, 118.7, 118.6, 118.44, 118.42, 110.5, 109.96, 109.87, 108.5, 55.2, 54.9, 47.1, 45.1, 45.0, 42.0, 40.5, 40.3, 36.3, 34.9, 28.7, 21.8, 20.0, 18.79; **IR** (thin film):  $\nu$  3069, 2964, 2366, 1629, 1581, 1445, 1245 cm<sup>-1</sup>; **HRMS** (ESI) (m/z): [M-H]<sup>-</sup> calculated for C<sub>22</sub>H<sub>24</sub>O<sub>3</sub>, 335.1653; found, 335.1652;  $[\alpha]_D^{22} - 61.2^\circ$  (c1.0, CH<sub>2</sub>Cl<sub>2</sub>).

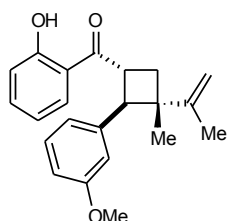

**(2-Hydroxyphenyl)((1*R*,2*R*,3*S*)-2-(3-methoxyphenyl)-3-methyl-3-(prop-1-en-2-yl)cyclobutyl)methanone** (Figure 2, 13). **Experiment 1:** Prepared according to general procedure B using 101.7 mg (0.40 mmol) (*E*)-1-(2-hydroxyphenyl)-3-(3-methoxyphenyl)prop-2-en-1-one, 19.2 mg (0.04 mmol) Sc(OTf)<sub>3</sub>, 20.0 mg (0.06 mmol) (*S,S*)-*t*-BuPyBox, 8.7 mg (0.01 mmol) Ru(bpy)<sub>3</sub>(PF<sub>6</sub>)<sub>2</sub>, 12 mL (3:1) *i*-PrOAc:MeCN, 450  $\mu$ L (4.0 mmol) 2,3-dimethylbutadiene, and an irradiation time of 2 h. The crude material

resulted in a 2:1 (major:minor) mixture of inseparable diastereomers that was purified by flash-column chromatography on silica gel (2.5% EtOAc:Hex). Combined yield: 108 mg of a clear oil (80%, 0.32 mmol) as a 2:1 (major:minor) mixture of diastereomers; 88% ee (Daicel CHIRALPAK<sup>®</sup> OJ-H, 3% (25% *i*-PrOH:Hex), 3 mL/min, 245 nm;  $t_1 = 6.9$  min,  $t_2 = 8.6$  min). Characterization data was obtained for the major diastereomer by flash-column chromatography (2.5 - 5% EtOAc:Hex). **Experiment 2:** 101.7 mg (0.40 mmol) (*E*)-1-(2-hydroxyphenyl)-3-(3-methoxyphenyl)prop-2-en-1-one, 19.2 mg (0.04 mmol) Sc(OTf)<sub>3</sub>, 20.0 mg (0.06 mmol) (*S,S*)-*t*-BuPyBox, 8.7 mg (0.01 mmol) Ru(bpy)<sub>3</sub>(PF<sub>6</sub>)<sub>2</sub>, 12 mL (3:1) *i*-PrOAc:MeCN, 450  $\mu$ L (4.0 mmol) 2,3-dimethylbutadiene. Crude d.r.: 2:1; Combined isolated yield: 102 mg of a clear oil (76%, 0.30 mmol); 88% ee.

<sup>1</sup>H NMR (500 MHz, CDCl<sub>3</sub>):  $\delta$  12.35 (s, 1H), 7.73 (dd,  $J = 8.0, 1.5$  Hz, 1H), 7.46 (ddd,  $J = 8.9, 7.9, 1.7$  Hz, 1H), 7.23 (dd,  $J = 8.9, 7.7$  Hz, 1H), 6.98 (dd,  $J = 8.5, 1.1$  Hz, 1H), 6.87 (ddd,  $J = 8.5, 7.6, 1.1$  Hz, 1H), 6.82 (d,  $J = 7.5$  Hz, 1H), 6.75-6.78 (m, 2H), 4.91 (s, 1H), 4.84 (m, 1H), 4.23 (q,  $J = 9.0$  Hz, 1H), 4.17 (d,  $J = 9.4$  Hz, 1H), 3.77 (s, 3H), 2.37 (dd,  $J = 10.6, 9.4$  Hz, 1H), 2.23 (dd,  $J = 10.6, 8.2$  Hz, 1H), 1.76 (s, 3H), 1.18 (s, 3H); <sup>13</sup>C NMR (126 MHz, CDCl<sub>3</sub>):  $\delta$  206.2, 162.8, 159.5, 152.1, 141.3, 136.3, 130.0, 129.2, 120.4, 118.8, 118.6, 118.56, 118.47, 114.3, 111.3, 109.1, 55.2, 47.1, 45.1, 40.7, 36.9, 21.7, 18.9; **IR** (thin film):  $\nu$  2960, 2933, 2859, 2366, 2335, 1633, 1240 cm<sup>-1</sup>; **HRMS** (ESI) (m/z): [M-H]<sup>-</sup> calculated for C<sub>22</sub>H<sub>24</sub>O<sub>3</sub>, 335.1653; found, 335.1653;  $[\alpha]_D^{22} - 44.4^\circ$  (c1.0, CH<sub>2</sub>Cl<sub>2</sub>).

**(1*R*,2*S*,3*S*)-2-(Furan-3-yl)-3-methyl-3-(prop-1-en-2-yl)cyclobutyl(2-**

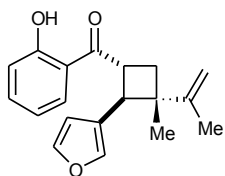

**hydroxyphenyl)methanone** (Figure 2, 14). Experiment 1: Prepared according to general procedure B using 85.7 mg (0.40 mmol) (*E*)-3-(furan-3-yl)-1-(2-hydroxyphenyl)prop-2-en-1-one, 19.2 mg (0.04 mmol) Sc(OTf)<sub>3</sub>, 20.0 mg (0.06 mmol) (*S,S*)-*t*-BuPyBox, 8.7 mg (0.01 mmol) Ru(bpy)<sub>3</sub>(PF<sub>6</sub>)<sub>2</sub>, 12 mL (3:1) *i*-PrOAc:MeCN, 450 μL (4.0 mmol) 2,3-dimethylbutadiene, and an irradiation time of 1.5 h. The crude material

resulted in a 3.5:1 (major:minor) mixture of inseparable diastereomers that was purified by flash-column chromatography on silica gel (2.5% EtOAc:Hex). Combined yield: 97.8 mg of a clear oil (83%, 0.33 mmol) as a 4:1 (major:minor) mixture of diastereomers; 85% ee (Daicel CHIRALPAK® OJ-H, Shimadzu HPLC, gradient 1-10% (*i*-PrOH:Hex), 0.7 mL/min, 265 nm; t<sub>1</sub> = 10.1 min, t<sub>2</sub> = 15.5 min). Characterization data was obtained for the major diastereomer by flash-column chromatography (2.5% EtOAc:Hex). Experiment 2: 85.7 mg (0.40 mmol) (*E*)-3-(furan-3-yl)-1-(2-hydroxyphenyl)prop-2-en-1-one, 19.2 mg (0.04 mmol) Sc(OTf)<sub>3</sub>, 20.0 mg (0.06 mmol) (*S,S*)-*t*-BuPyBox, 8.7 mg (0.01 mmol) Ru(bpy)<sub>3</sub>(PF<sub>6</sub>)<sub>2</sub>, 12 mL (3:1) *i*-PrOAc:MeCN, 450 μL (4.0 mmol) 2,3-dimethylbutadiene. Crude d.r.: 4:1; Combined isolated yield: 95.0 mg of a clear oil (80%, 0.32 mmol); 85% ee.

<sup>1</sup>H NMR (500 MHz, CDCl<sub>3</sub>): δ 12.33 (s, 1H), 7.65 (dd, *J* = 8.1, 1.7 Hz, 1H), 7.45 (ddd, *J* = 8.6, 7.6, 1.5 Hz, 1H), 7.38 (t, *J* = 1.7 Hz, 1H), 7.29 (m, 1H), 6.97 (dd, *J* = 8.4, 1.1 Hz, 1H), 6.85 (ddd, *J* = 8.5, 7.5, 1.1 Hz, 1H), 6.37 (m, 1H), 4.77 (s, 2H), 3.99 (q, *J* = 9.1 Hz, 1H), 3.87 (d, *J* = 9.8 Hz, 1H), 2.41 (t, *J* = 10.3 Hz, 1H), 2.20 (dd, *J* = 11.5, 9.0 Hz, 1H), 1.70 (s, 3H), 1.24 (s, 3H); <sup>13</sup>C NMR (126 MHz, CDCl<sub>3</sub>): δ 206.0, 162.7, 157.0, 152.6, 143.0, 140.0, 136.3, 130.0, 123.9, 118.8, 118.5, 110.8, 108.3, 44.5, 41.9, 39.9, 36.4, 22.4, 18.3; IR (thin film): ν 2968, 2929, 2366, 2331, 1760, 1633, 1484, 1450, 1235 cm<sup>-1</sup>; HRMS (ESI) (*m/z*): [M-H]<sup>-</sup> calculated for C<sub>19</sub>H<sub>20</sub>O<sub>3</sub>, 295.1340; found, 295.1339; [α]<sub>D</sub><sup>22</sup> -77.2° (*c*0.8, CH<sub>2</sub>Cl<sub>2</sub>).

**D. Stereochemical Assignment of Minor Diastereomer by 1D NOESY**

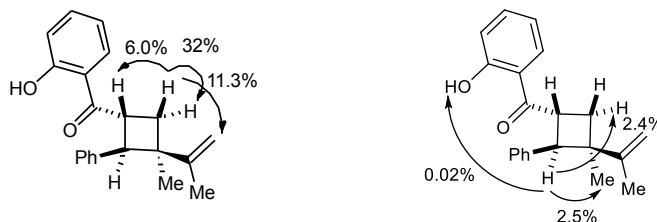

**Fig. S2.** 1D NOESY correlations for **8** (minor diastereomer).

**E. Procedure for Derivatization of **9** for X-Ray Analysis**

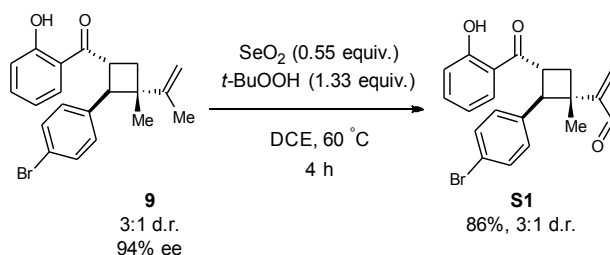

**Fig. S3.** Riley oxidation of enantioenriched vinylcyclobutane **9**

**2-((1S,2R,3R)-2-(4-Bromophenyl)-3-(2-hydroxybenzoyl)-1-methylcyclobutyl)acrylaldehyde (SX).** Riley oxidation of **9** was conducted using a variation of a known procedure.<sup>(42)</sup> An oven-dried 6 dram vial equipped with a magnetic stir bar was charged with SeO<sub>2</sub> (40.0 mg, 0.36 mmol) and 1 mL of DCE. To the white slurry was added *t*-BuOOH (97 μL, 0.86 mmol, 18 wt % in H<sub>2</sub>O) dropwise followed by 10 min of stirring at rt. To the solution was then added **9** (250 mg, 0.65 mmol) as a solution in 5.5 mL of DCE. The vial was then sealed with a Teflon-lined cap and the reaction vessel was heated at 60 °C for 4 h. Upon completion of the reaction, as monitored by TLC, the reaction was diluted with 10 mL of DCM and washed with H<sub>2</sub>O (3 X 5 mL). The organic layer was then dried over MgSO<sub>4</sub> and filtered. The solvent was removed *in vacuo* and the crude oil was then subjected to flash column chromatography (10% - 20% acetone:hexane) to afford title compound **S1** in 3.3:1 d.r. (200 mg, 86% yield) as a white foam. An analytically pure sample of the major isomer of **S1** was isolated for characterization purposes by flash column chromatography (10% to 20% acetone:hexane) affording a white solid that was recrystallized from 5% acetone:hexane to afford X-ray quality crystals.

<sup>1</sup>H NMR (500 MHz, CDCl<sub>3</sub>): δ 12.19 (s, 1H), 9.54 (s, 1H), 7.65 (dd, *J* = 8.1, 1.9 Hz, 1H), 7.48 (dd, *J* = 6.9, 1.5 Hz, 1H), 7.46 (d, *J* = 8.33, 2H), 7.10 (d, *J* = 8.7 Hz, 2H), 6.98 (dd, *J* = 8.5, 1.2 Hz, 1H), 6.88 (ddd, *J* = 7.4, 7.0, 1.2 Hz, 1H), 6.48 (s, 1H), 6.08 (s, 1H), 4.27 (q, *J* = 9.0 Hz, 1H), 4.24 (d, *J* = 8.0 Hz, 1H), 2.55-2.60 (m, 1H), 2.41-2.46 (m, 1H), 1.27 (s, 3H); <sup>13</sup>C NMR (126 MHz, CDCl<sub>3</sub>): δ 205.5, 193.8, 162.7, 156.9, 137.9, 136.6, 133.1, 131.5, 129.9, 129.7, 120.8, 119.0, 118.6, 118.1, 46.8, 42.7, 41.6, 37.6, 21.9; IR (thin film): ν 2971, 2929, 2363, 2333, 1687, 1630, 1487, 1445, 1244, 1159, 1010, 757 cm<sup>-1</sup>; mp = 115-117 °C; HRMS (ESI) (*m/z*): [M-H]<sup>-</sup> calculated for C<sub>21</sub>H<sub>19</sub>BrO<sub>3</sub>, 397.0445; found, 397.0446; [α]<sub>D</sub><sup>22</sup> -49.4° (*c*1.6, CH<sub>2</sub>Cl<sub>2</sub>).

#### F. X-Ray Crystallographic Data for **S1**

##### Data Collection for **S1**

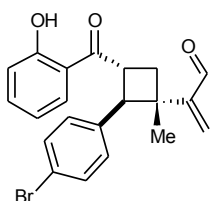

A colorless crystal with approximate dimensions 0.23 x 0.05 x 0.02 mm<sup>3</sup> was selected under oil under ambient conditions and attached to the tip of a MiTeGen MicroMount®. The crystal was mounted in a stream of cold nitrogen at 100(1) K and centered in the X-ray beam by using a video camera. The crystal evaluation and data collection were performed on a Bruker Quazar SMART APEXII diffractometer with Mo Kα ( $\lambda = 0.71073$  Å) radiation and the diffractometer to crystal distance of 4.96 cm.<sup>(43)</sup>

The initial cell constants were obtained from three series of  $\omega$  scans at different starting angles. Each series consisted of 12 frames collected at intervals of 0.5° in a 6° range about  $\omega$  with the exposure time of 10 seconds per frame. The reflections were successfully indexed by an automated indexing routine built in the APEXII program suite.

The final cell constants were calculated from a set of 9964 strong reflections from the actual data collection. The data were collected by using the full sphere data collection routine to survey the reciprocal space to the extent of a full sphere to a resolution of 0.70 Å. A total of 42386 data were harvested by collecting 5 sets of frames with 0.5° scans in  $\omega$  and  $\phi$  with exposure times of 30 sec per frame. These highly redundant datasets were corrected for Lorentz and polarization effects. The absorption correction was based on fitting a function to the empirical transmission surface as sampled by multiple equivalent measurements.<sup>(44)</sup>



## Structure Solution and Refinement

The systematic absences in the diffraction data were uniquely consistent for the space group  $P2_12_12_1$  that yielded chemically reasonable and computationally stable results of refinement.(45–50) A successful solution by the direct methods provided most non-hydrogen atoms from the E-map. The remaining non-hydrogen atoms were located in an alternating series of least-squares cycles and difference Fourier maps. All non-hydrogen atoms were refined with anisotropic displacement coefficients. The hydroxyl H atom was located in the difference Fourier map and refined independently. All other hydrogen atoms were included in the structure factor calculation at idealized positions and were allowed to ride on the neighboring atoms with relative isotropic displacement coefficients.

The absolute configuration of the chiral centers was unequivocally established by resonant scattering as follows: C1 – *R*, C2 – *R*, C4 – *S*. The final least-squares refinement of 231 parameters against 5363 data resulted in residuals *R* (based on  $F^2$  for  $I \geq 2\sigma$ ) and *wR* (based on  $F^2$  for all data) of 0.0253 and 0.0626, respectively. The final difference Fourier map was featureless.

## Summary

**Crystal Data** for  $C_{21}H_{19}BrO_3$  ( $M=399.27$  g/mol): orthorhombic, space group  $P2_12_12_1$  (no. 19),  $a = 6.035(2)$  Å,  $b = 9.961(3)$  Å,  $c = 29.033(9)$  Å,  $V = 1745.2(10)$  Å<sup>3</sup>,  $Z = 4$ ,  $T = 99.99$  K,  $\mu(\text{MoK}\alpha) = 2.372$  mm<sup>-1</sup>,  $D_{\text{calc}} = 1.520$  g/cm<sup>3</sup>, 42386 reflections measured ( $2.806^\circ \leq 2\theta \leq 61.146^\circ$ ), 5363 unique ( $R_{\text{int}} = 0.0414$ ,  $R_{\text{sigma}} = 0.0272$ ) which were used in all calculations. The final  $R_1$  was 0.0253 ( $I > 2\sigma(I)$ ) and  $wR_2$  was 0.0626 (all data).

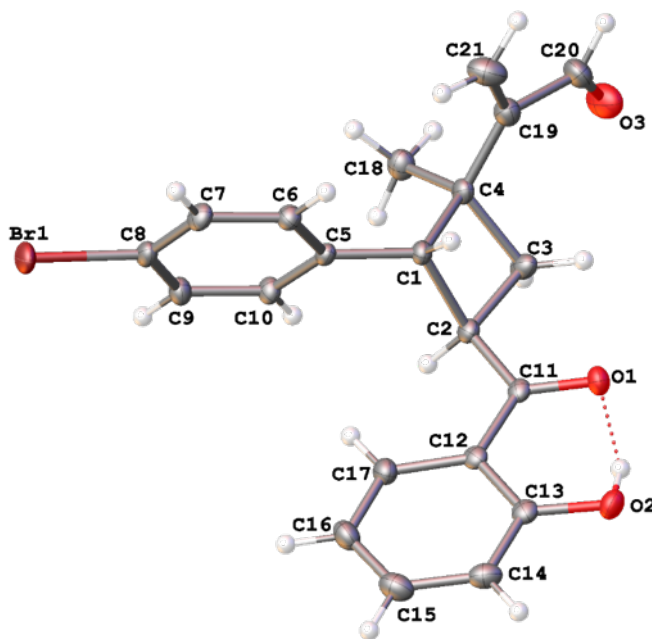

**Fig. S4.** A molecular drawing of **S1** shown with 50% probability ellipsoids.

**Table S7.** Crystal data and structure refinement for **S1**.

|                                             |                                                               |
|---------------------------------------------|---------------------------------------------------------------|
| Identification code                         | <b>S1</b>                                                     |
| Empirical formula                           | C <sub>21</sub> H <sub>19</sub> BrO <sub>3</sub>              |
| Formula weight                              | 399.27                                                        |
| Temperature/K                               | 99.99                                                         |
| Crystal system                              | orthorhombic                                                  |
| Space group                                 | P2 <sub>1</sub> 2 <sub>1</sub> 2 <sub>1</sub>                 |
| a/Å                                         | 6.035(2)                                                      |
| b/Å                                         | 9.961(3)                                                      |
| c/Å                                         | 29.033(9)                                                     |
| α/°                                         | 90                                                            |
| β/°                                         | 90                                                            |
| γ/°                                         | 90                                                            |
| Volume/Å <sup>3</sup>                       | 1745.2(10)                                                    |
| Z                                           | 4                                                             |
| ρ <sub>calc</sub> /cm <sup>3</sup>          | 1.520                                                         |
| μ/mm <sup>-1</sup>                          | 2.372                                                         |
| F(000)                                      | 816.0                                                         |
| Crystal size/mm <sup>3</sup>                | 0.227 × 0.05 × 0.02                                           |
| Radiation                                   | MoKα (λ = 0.71073)                                            |
| 2θ range for data collection/°              | 2.806 to 61.146                                               |
| Index ranges                                | -8 ≤ h ≤ 8, -14 ≤ k ≤ 14, -41 ≤ l ≤ 41                        |
| Reflections collected                       | 42386                                                         |
| Independent reflections                     | 5363 [R <sub>int</sub> = 0.0414, R <sub>sigma</sub> = 0.0272] |
| Data/restraints/parameters                  | 5363/0/231                                                    |
| Goodness-of-fit on F <sup>2</sup>           | 1.042                                                         |
| Final R indexes [I ≥ 2σ(I)]                 | R <sub>1</sub> = 0.0253, wR <sub>2</sub> = 0.0616             |
| Final R indexes [all data]                  | R <sub>1</sub> = 0.0298, wR <sub>2</sub> = 0.0626             |
| Largest diff. peak/hole / e Å <sup>-3</sup> | 0.39/-0.28                                                    |
| Flack parameter                             | -0.013(3)                                                     |

**Table S8.** Fractional Atomic Coordinates ( $\times 10^4$ ) and Equivalent Isotropic Displacement Parameters ( $\text{\AA}^2 \times 10^3$ ) for **S1**.  $U_{\text{eq}}$  is defined as 1/3 of the trace of the orthogonalised  $U_{ij}$  tensor.

| Atom | x         | y          | z         | U(eq)    |
|------|-----------|------------|-----------|----------|
| Br1  | 8712.7(4) | 616.6(2)   | 3711.5(2) | 24.95(7) |
| O1   | -455(3)   | 7698.5(16) | 4189.1(6) | 20.2(3)  |
| O2   | -2942(3)  | 6791.4(18) | 4817.2(6) | 21.6(3)  |
| O3   | 3315(4)   | 9509.8(19) | 2737.9(7) | 36.7(5)  |
| C1   | 3128(4)   | 5812(2)    | 3568.9(7) | 14.9(4)  |
| C2   | 3065(4)   | 6844(2)    | 3979.4(8) | 15.8(4)  |
| C3   | 3255(4)   | 8009(2)    | 3631.6(8) | 20.9(5)  |
| C4   | 3905(4)   | 7006(2)    | 3244.8(7) | 17.1(4)  |
| C5   | 4492(4)   | 4555(2)    | 3605.3(7) | 14.5(4)  |
| C6   | 3755(4)   | 3358(2)    | 3405.8(7) | 17.1(4)  |
| C7   | 5006(4)   | 2183(2)    | 3428.4(8) | 18.8(5)  |
| C8   | 7018(4)   | 2211(2)    | 3656.3(8) | 18.0(4)  |
| C9   | 7800(4)   | 3374(2)    | 3859.0(8) | 18.5(4)  |
| C10  | 6531(3)   | 4539(2)    | 3830.1(7) | 17.1(4)  |
| C11  | 970(3)    | 6841(2)    | 4266.8(7) | 14.2(4)  |
| C12  | 612(4)    | 5820(2)    | 4626.1(7) | 15.2(4)  |
| C13  | -1362(4)  | 5851(2)    | 4886.1(7) | 17.5(4)  |
| C14  | -1755(4)  | 4896(3)    | 5229.5(8) | 22.5(5)  |
| C15  | -173(5)   | 3928(3)    | 5318.3(9) | 25.8(5)  |
| C16  | 1798(4)   | 3893(2)    | 5070.5(9) | 23.5(5)  |
| C17  | 2189(4)   | 4823(2)    | 4728.8(8) | 19.7(4)  |
| C18  | 6398(4)   | 7040(2)    | 3140.4(8) | 22.1(4)  |
| C19  | 2641(4)   | 7141(2)    | 2801.3(9) | 21.9(5)  |
| C20  | 2498(5)   | 8484(3)    | 2585.0(9) | 27.9(6)  |
| C21  | 1659(5)   | 6144(3)    | 2578.0(9) | 31.3(6)  |

**Table S9.** Anisotropic Displacement Parameters ( $\text{\AA}^2 \times 10^3$ ) for **S1**. The Anisotropic displacement factor exponent takes the form:  $-2\pi^2[h^2a^{*2}U_{11}+2hka^*b^*U_{12}+\dots]$ .

| Atom | $U_{11}$  | $U_{22}$ | $U_{33}$  | $U_{23}$ | $U_{13}$  | $U_{12}$ |
|------|-----------|----------|-----------|----------|-----------|----------|
| Br1  | 33.27(12) | 15.00(9) | 26.59(12) | -0.50(9) | -1.83(11) | 11.39(9) |
| O1   | 21.9(8)   | 16.9(8)  | 21.8(8)   | 2.0(7)   | -1.2(7)   | 5.5(6)   |
| O2   | 20.0(8)   | 20.1(8)  | 24.8(9)   | -1.7(7)  | 3.8(7)    | 4.6(7)   |
| O3   | 57.6(13)  | 20.3(9)  | 32.2(10)  | 3.9(8)   | -0.9(9)   | 1.6(10)  |
| C1   | 16.8(9)   | 12.7(9)  | 15.2(9)   | -0.8(7)  | -0.7(7)   | 2.9(7)   |
| C2   | 19.8(10)  | 11.8(8)  | 15.7(10)  | -2.0(8)  | -0.4(8)   | 2.5(8)   |
| C3   | 30.5(12)  | 13.9(9)  | 18.2(11)  | -0.1(8)  | 4.6(9)    | 2.1(8)   |
| C4   | 21.1(10)  | 12.3(9)  | 17.7(10)  | 1.3(8)   | 0.6(9)    | 2.8(8)   |
| C5   | 18.4(9)   | 11.5(9)  | 13.7(10)  | -0.6(7)  | 1.7(7)    | 3.2(7)   |
| C6   | 19.2(9)   | 14.5(9)  | 17.6(10)  | -1.8(8)  | -1.2(9)   | 0.9(9)   |
| C7   | 23.9(11)  | 11.8(10) | 20.9(11)  | -3.1(8)  | 1.3(9)    | 0.7(8)   |
| C8   | 22.9(10)  | 12.9(8)  | 18.3(11)  | 1.6(8)   | 2.9(8)    | 5.1(8)   |
| C9   | 19(1)     | 16.4(10) | 20.2(11)  | 1.1(8)   | -1.1(8)   | 3.3(8)   |
| C10  | 20(1)     | 11.8(9)  | 19.3(10)  | -1.5(7)  | -1.5(8)   | 1.4(8)   |
| C11  | 16.8(10)  | 11.9(8)  | 14.0(9)   | -4.2(7)  | -2.7(8)   | 0.4(8)   |
| C12  | 21.2(9)   | 11.3(9)  | 13.0(9)   | -3.2(7)  | -1.7(7)   | -0.1(7)  |
| C13  | 21.0(9)   | 14.9(9)  | 16.7(9)   | -4.6(7)  | -2.2(9)   | -0.4(9)  |
| C14  | 25.9(13)  | 23.5(11) | 18.3(11)  | -1.3(9)  | 2.1(9)    | -5.4(9)  |
| C15  | 34.6(13)  | 24.0(12) | 18.9(12)  | 3.6(9)   | -3.3(10)  | -4.4(10) |
| C16  | 29.5(13)  | 19.5(10) | 21.6(12)  | 2.9(9)   | -5.1(9)   | 3.8(9)   |
| C17  | 24.2(11)  | 16.9(10) | 18.1(11)  | -1.0(8)  | -1.7(9)   | 4.2(9)   |
| C18  | 22.9(11)  | 18.7(10) | 24.8(11)  | 2.8(9)   | 2.1(10)   | 0.0(9)   |
| C19  | 24.1(12)  | 20.5(11) | 21.0(12)  | 2.0(9)   | 0.6(9)    | 3.2(9)   |
| C20  | 35.3(15)  | 26.5(13) | 21.8(12)  | 6(1)     | -2.4(10)  | 7.7(11)  |
| C21  | 37.6(16)  | 34.9(14) | 21.5(12)  | 3.1(10)  | -3.2(11)  | -6.8(12) |

**Table S10.** Bond Lengths for **S1**.

| Atom | Atom | Length/Å | Atom | Atom | Length/Å |
|------|------|----------|------|------|----------|
| Br1  | C8   | 1.896(2) | C6   | C7   | 1.395(3) |
| O1   | C11  | 1.233(3) | C7   | C8   | 1.383(3) |
| O2   | C13  | 1.352(3) | C8   | C9   | 1.382(3) |
| O3   | C20  | 1.218(3) | C9   | C10  | 1.393(3) |
| C1   | C2   | 1.574(3) | C11  | C12  | 1.472(3) |
| C1   | C4   | 1.588(3) | C12  | C13  | 1.410(3) |
| C1   | C5   | 1.502(3) | C12  | C17  | 1.408(3) |
| C2   | C3   | 1.543(3) | C13  | C14  | 1.398(3) |
| C2   | C11  | 1.515(3) | C14  | C15  | 1.381(4) |
| C3   | C4   | 1.553(3) | C15  | C16  | 1.391(4) |
| C4   | C18  | 1.535(3) | C16  | C17  | 1.378(3) |
| C4   | C19  | 1.503(3) | C19  | C20  | 1.480(4) |
| C5   | C6   | 1.397(3) | C19  | C21  | 1.326(4) |
| C5   | C10  | 1.393(3) |      |      |          |

**Table S11.** Bond Angles for **S1**.

| Atom | Atom | Atom | Angle/°    | Atom | Atom | Atom | Angle/°    |
|------|------|------|------------|------|------|------|------------|
| C2   | C1   | C4   | 88.07(15)  | C9   | C8   | C7   | 121.3(2)   |
| C5   | C1   | C2   | 120.28(18) | C8   | C9   | C10  | 119.0(2)   |
| C5   | C1   | C4   | 120.32(18) | C5   | C10  | C9   | 121.54(19) |
| C3   | C2   | C1   | 89.66(16)  | O1   | C11  | C2   | 118.7(2)   |
| C11  | C2   | C1   | 115.83(17) | O1   | C11  | C12  | 120.4(2)   |
| C11  | C2   | C3   | 115.06(18) | C12  | C11  | C2   | 120.93(18) |
| C2   | C3   | C4   | 90.45(15)  | C13  | C12  | C11  | 119.22(19) |
| C3   | C4   | C1   | 88.80(16)  | C17  | C12  | C11  | 122.5(2)   |
| C18  | C4   | C1   | 115.02(18) | C17  | C12  | C13  | 118.2(2)   |
| C18  | C4   | C3   | 112.11(19) | O2   | C13  | C12  | 122.1(2)   |
| C19  | C4   | C1   | 115.14(19) | O2   | C13  | C14  | 117.2(2)   |
| C19  | C4   | C3   | 115.72(19) | C14  | C13  | C12  | 120.7(2)   |
| C19  | C4   | C18  | 109.03(19) | C15  | C14  | C13  | 119.4(2)   |
| C6   | C5   | C1   | 120.50(19) | C14  | C15  | C16  | 120.8(2)   |
| C10  | C5   | C1   | 121.75(18) | C17  | C16  | C15  | 120.2(2)   |
| C10  | C5   | C6   | 117.75(19) | C16  | C17  | C12  | 120.7(2)   |
| C7   | C6   | C5   | 121.6(2)   | C20  | C19  | C4   | 118.3(2)   |
| C8   | C7   | C6   | 118.7(2)   | C21  | C19  | C4   | 125.4(2)   |
| C7   | C8   | Br1  | 119.80(17) | C21  | C19  | C20  | 116.3(2)   |
| C9   | C8   | Br1  | 118.83(17) | O3   | C20  | C19  | 125.4(2)   |

**Table S12.** Hydrogen Bonds for **S1**.

| D  | H  | A  | d(D-H)/Å | d(H-A)/Å | d(D-A)/Å | D-H-A/° |
|----|----|----|----------|----------|----------|---------|
| O2 | H2 | O1 | 0.80(4)  | 1.77(4)  | 2.529(3) | 157(4)  |

**Table S13.** Torsion Angles for **S1**.

| A   | B   | C   | D   | Angle/°     | A   | B   | C   | D   | Angle/°     |
|-----|-----|-----|-----|-------------|-----|-----|-----|-----|-------------|
| Br1 | C8  | C9  | C10 | -178.25(17) | C4  | C1  | C5  | C10 | 70.9(3)     |
| O1  | C11 | C12 | C13 | -1.2(3)     | C4  | C19 | C20 | O3  | -0.4(4)     |
| O1  | C11 | C12 | C17 | -179.8(2)   | C5  | C1  | C2  | C3  | 137.4(2)    |
| O2  | C13 | C14 | C15 | -178.9(2)   | C5  | C1  | C2  | C11 | -104.7(2)   |
| C1  | C2  | C3  | C4  | -13.28(16)  | C5  | C1  | C4  | C3  | -137.3(2)   |
| C1  | C2  | C11 | O1  | -98.9(2)    | C5  | C1  | C4  | C18 | -23.4(3)    |
| C1  | C2  | C11 | C12 | 79.9(2)     | C5  | C1  | C4  | C19 | 104.7(2)    |
| C1  | C4  | C19 | C20 | 153.0(2)    | C5  | C6  | C7  | C8  | 0.3(3)      |
| C1  | C4  | C19 | C21 | -28.3(3)    | C6  | C5  | C10 | C9  | -0.3(3)     |
| C1  | C5  | C6  | C7  | 179.0(2)    | C6  | C7  | C8  | Br1 | 177.85(18)  |
| C1  | C5  | C10 | C9  | -179.3(2)   | C6  | C7  | C8  | C9  | -0.1(3)     |
| C2  | C1  | C4  | C3  | -12.91(16)  | C7  | C8  | C9  | C10 | -0.3(4)     |
| C2  | C1  | C4  | C18 | 101.02(19)  | C8  | C9  | C10 | C5  | 0.5(3)      |
| C2  | C1  | C4  | C19 | -130.93(19) | C10 | C5  | C6  | C7  | -0.1(3)     |
| C2  | C1  | C5  | C6  | 144.6(2)    | C11 | C2  | C3  | C4  | -131.85(19) |
| C2  | C1  | C5  | C10 | -36.3(3)    | C11 | C12 | C13 | O2  | -0.2(3)     |
| C2  | C3  | C4  | C1  | 13.17(16)   | C11 | C12 | C13 | C14 | 180.0(2)    |
| C2  | C3  | C4  | C18 | -103.45(19) | C11 | C12 | C17 | C16 | 179.4(2)    |
| C2  | C3  | C4  | C19 | 130.7(2)    | C12 | C13 | C14 | C15 | 1.0(3)      |
| C2  | C11 | C12 | C13 | -179.96(19) | C13 | C12 | C17 | C16 | 0.8(3)      |
| C2  | C11 | C12 | C17 | 1.4(3)      | C13 | C14 | C15 | C16 | 0.0(4)      |
| C3  | C2  | C11 | O1  | 3.8(3)      | C14 | C15 | C16 | C17 | -0.6(4)     |
| C3  | C2  | C11 | C12 | -177.40(19) | C15 | C16 | C17 | C12 | 0.1(4)      |
| C3  | C4  | C19 | C20 | 51.4(3)     | C17 | C12 | C13 | O2  | 178.5(2)    |
| C3  | C4  | C19 | C21 | -129.9(3)   | C17 | C12 | C13 | C14 | -1.4(3)     |
| C4  | C1  | C2  | C3  | 13.00(16)   | C18 | C4  | C19 | C20 | -76.0(3)    |
| C4  | C1  | C2  | C11 | 130.89(19)  | C18 | C4  | C19 | C21 | 102.7(3)    |
| C4  | C1  | C5  | C6  | -108.1(2)   | C21 | C19 | C20 | O3  | -179.3(3)   |

**Table S14.** Hydrogen Atom Coordinates ( $\text{\AA} \times 10^4$ ) and Isotropic Displacement Parameters ( $\text{\AA}^2 \times 10^3$ ) for **S1**.

| Atom | x         | y        | z        | U(eq)  |
|------|-----------|----------|----------|--------|
| H2   | -2310(70) | 7270(40) | 4638(15) | 52(12) |
| H1   | 1574      | 5560     | 3486     | 18     |
| H2A  | 4420      | 6772     | 4176     | 19     |
| H3A  | 4440      | 8660     | 3708     | 25     |
| H3B  | 1833      | 8477     | 3574     | 25     |
| H6   | 2368      | 3345     | 3251     | 21     |
| H7   | 4486      | 1378     | 3290     | 23     |
| H9   | 9182      | 3379     | 4016     | 22     |
| H10  | 7069      | 5342     | 3967     | 20     |
| H14  | -3097     | 4914     | 5400     | 27     |
| H15  | -436      | 3278     | 5551     | 31     |
| H16  | 2878      | 3227     | 5137     | 28     |
| H17  | 3539      | 4792     | 4561     | 24     |
| H18A | 7231      | 7059     | 3430     | 33     |
| H18B | 6746      | 7845     | 2960     | 33     |
| H18C | 6809      | 6239     | 2964     | 33     |
| H20  | 1702      | 8552     | 2304     | 33     |
| H21A | 917       | 6314     | 2295     | 38     |
| H21B | 1697      | 5260     | 2701     | 38     |

G. Procedure for [2+2] Cycloaddition under 350 nm irradiation (Figure S6)

In a 25 mL Schlenck flask were combined 2'-hydroxychalcone (22.5 mg, 0.100 mmol), Sc(OTf)<sub>3</sub> (24.1 mg, 0.49 equiv.), <sup>t</sup>BuPyBox (24.5 mg, 0.74 equiv.), and sensitizer (2.5 mol% – 50 mol% as indicated). Solvent (3:1 iPrOAc:MeCN, 3 mL) was then added to the flask, and the mixture stirred to dissolve. After addition of 2,3-dimethyl-1,2-butadiene (110  $\mu$ L, 9.72 equiv.) by syringe, the flask was sealed, and degassed by three freeze-pump-thaw cycles. After the final thaw, the flask was backfilled with nitrogen gas, and sealed. The resulting solution was then stirred in a Rayonet photoreactor (bulb emission  $\lambda_{\text{max}} = 350$  nm) for 18 hours. At 18 hours, irradiation was ceased, phenanthrene was added as an internal standard and allowed to dissolve. The reaction mixture was diluted with H<sub>2</sub>O and Et<sub>2</sub>O (approx. 2.0 mL each), and mixed vigorously. After allowing the layers to separate, the organic layer was removed by pipette, dried by passing through a plug of MgSO<sub>4</sub>, and concentrated *in vacuo*. The yield of **8** was obtained by <sup>1</sup>H NMR spectroscopic analysis of the crude reaction mixture (relative to phenanthrene internal standard), and the crude material was purified by flash-column chromatography (2.5% EtOAc/Hexanes) to afford pure material for SFC analysis.

## H. Computational Experiments Modeling the Excited States of 2'-Hydroxychalcone 2.

The adiabatic  $S_0-T_1$  gap for 2'-hydroxychalcone and the  $Sc(2'\text{-hydroxychalcone})^{2+}$  complex were determined via the energy difference of the optimized singlet ground state structure and the first excited triplet structure. All ground state and triplet state geometries were optimized using the B3LYP density functional with 6-311+G(2d,p) basis set. All calculations were performed using the Gaussian09 software package.(51) Structures were confirmed to be a minimum on the potential energy surface via harmonic frequency calculations.

*2'-Hydroxychalcone*  
Optimized structure for  $S_0$ :

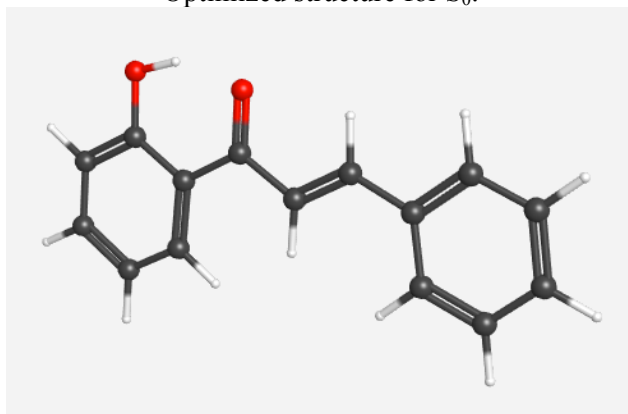

B3LYP/6-311+G(2d,p) energy: -729.4879467 Hartree

Optimized structure for  $T_1$ :

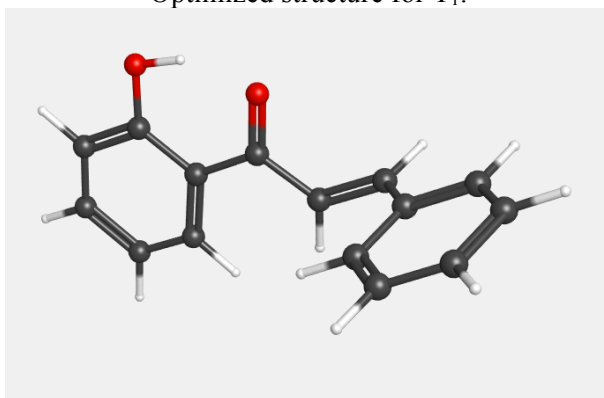

B3LYP/6-311+G(2d,p) energy: -729.4064396 Hartree

$S_0-T_1$  Energy (B3LYP/6-311+G(2d,p)): 0.081507106 Hartree (51.1 kcal/mol)



**Table S15.** 2'-Hydroxychalcone standard orientation  $S_0$  (coordinates)

| <b>Atom</b> | <b>X</b>    | <b>Y</b>    | <b>Z</b>   |
|-------------|-------------|-------------|------------|
| C           | 0.00000000  | 0.00000000  | 0.00000000 |
| C           | -1.37421500 | -0.12724300 | 0.00000000 |
| C           | -2.19629900 | 1.00526900  | 0.00000000 |
| C           | -1.62073500 | 2.25928000  | 0.00000000 |
| C           | -0.22321700 | 2.43488700  | 0.00000000 |
| C           | 0.59253400  | 1.26917100  | 0.00000000 |
| O           | 1.92726700  | 1.33382400  | 0.00000000 |
| H           | 2.15653100  | 2.30331100  | 0.00000000 |
| C           | 0.42343100  | 3.75958600  | 0.00000000 |
| C           | -0.38999300 | 4.98934000  | 0.00000000 |
| C           | 0.19888600  | 6.19678000  | 0.00000000 |
| C           | -0.44549300 | 7.50548300  | 0.00000000 |
| C           | -1.83877800 | 7.68215000  | 0.00000000 |
| C           | -2.39233200 | 8.95201200  | 0.00000000 |
| C           | -1.57018500 | 10.0785320  | 0.00000000 |
| C           | -0.18877900 | 9.92311500  | 0.00000000 |
| C           | 0.36578900  | 8.64980900  | 0.00000000 |
| H           | 1.44333800  | 8.53055600  | 0.00000000 |
| H           | 0.45701300  | 10.7929320  | 0.00000000 |
| H           | -2.00724700 | 11.0698230  | 0.00000000 |
| H           | -3.46948100 | 9.06893200  | 0.00000000 |
| H           | -2.49455100 | 6.82043700  | 0.00000000 |
| H           | 1.28511600  | 6.20363400  | 0.00000000 |
| H           | -1.46604500 | 4.90066200  | 0.00000000 |
| O           | 1.66567400  | 3.84553600  | 0.00000000 |
| H           | -2.26981000 | 3.12345100  | 0.00000000 |
| H           | -3.27355300 | 0.90007000  | 0.00000000 |
| H           | -1.81818900 | -1.11604300 | 0.00000000 |
| H           | 0.65048900  | -0.86541500 | 0.00000000 |

**Table S16.** 2'-Hydroxychalcone standard orientation T<sub>1</sub> (coordinates)

| <b>Atom</b> | <b>X</b>    | <b>Y</b>    | <b>Z</b>    |
|-------------|-------------|-------------|-------------|
| C           | 0.00000000  | 0.00000000  | 0.00000000  |
| C           | -0.32914000 | 1.28702700  | 0.37368900  |
| C           | 0.61753300  | 2.11661700  | 0.98634700  |
| C           | 1.88991000  | 1.63647100  | 1.21805200  |
| C           | 2.26656300  | 0.32933000  | 0.85359300  |
| C           | 1.29014600  | -0.49472000 | 0.22958500  |
| O           | 1.55684200  | -1.74673000 | -0.15584600 |
| H           | 2.51041300  | -1.91488900 | 0.07873200  |
| C           | 3.61963200  | -0.21732000 | 1.08135700  |
| C           | 4.64208200  | 0.56998000  | 1.73412900  |
| C           | 5.98259900  | 0.05196000  | 1.97951500  |
| C           | 7.11052400  | 0.29382400  | 1.16883000  |
| C           | 7.04084600  | 1.07332500  | -0.01731600 |
| C           | 8.16637400  | 1.29779700  | -0.78625400 |
| C           | 9.40042600  | 0.76003000  | -0.41319300 |
| C           | 9.49354100  | -0.01286500 | 0.74792100  |
| C           | 8.37694400  | -0.24465600 | 1.52533000  |
| H           | 8.45476500  | -0.84793500 | 2.42270000  |
| H           | 10.4480960  | -0.43505400 | 1.03951400  |
| H           | 10.2789430  | 0.93891900  | -1.02072400 |
| H           | 8.08920000  | 1.89438100  | -1.68773300 |
| H           | 6.08782700  | 1.49031500  | -0.32123800 |
| H           | 6.11360600  | -0.56910700 | 2.86319400  |
| H           | 4.39274300  | 1.55828100  | 2.10657500  |
| O           | 3.90350400  | -1.38392800 | 0.71912100  |
| H           | 2.60985900  | 2.29064400  | 1.69072600  |
| H           | 0.35494100  | 3.12568600  | 1.27676500  |
| H           | -1.33108600 | 1.65671100  | 0.18905600  |
| H           | -0.71899700 | -0.65458500 | -0.47604300 |

*Sc(2'-hydroxychalcone)<sup>2+</sup> complex*

Optimized structure for S<sub>0</sub>:

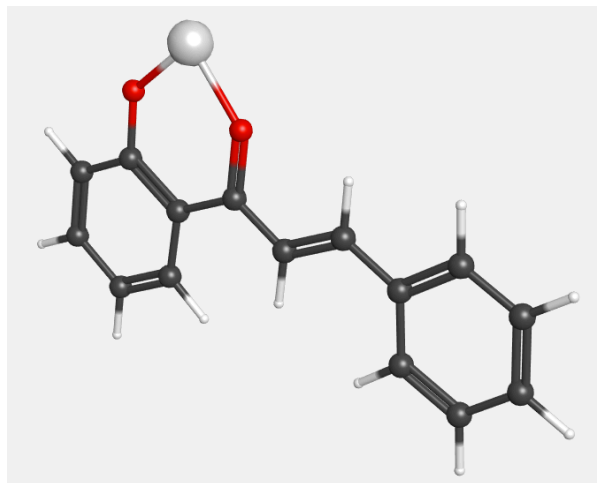

B3LYP/6-311+G(2d,p) energy: -1489.102955 Hartree

Optimized structure for T<sub>1</sub>:

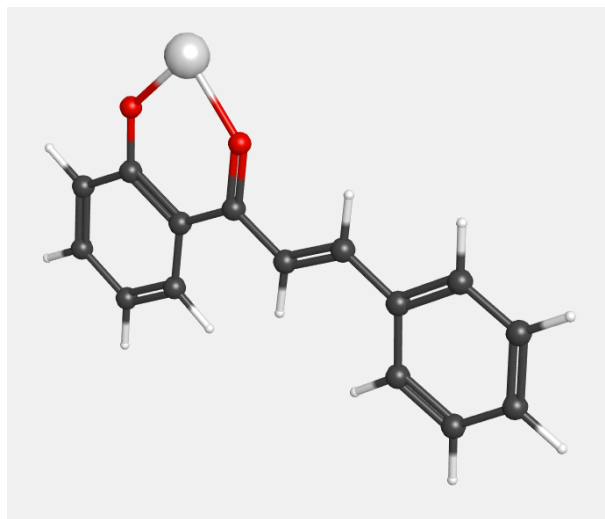

B3LYP/6-311+G(2d,p) energy: -1489.052643 Hartree

S<sub>0</sub>-T<sub>1</sub> Energy (B3LYP/6-311+G(2d,p)): 0.0503119 Hartree (31.6 kcal/mol)

**Table S17.** Sc(2'-hydroxychalcone) complex standard orientation  $S_0$  (coordinates)

| <b>Atom</b> | <b>X</b>    | <b>Y</b>    | <b>Z</b>   |
|-------------|-------------|-------------|------------|
| C           | 0.00000000  | 0.00000000  | 0.00000000 |
| C           | 1.32219600  | 0.42995600  | 0.00000000 |
| C           | 1.61343000  | 1.79299400  | 0.00000000 |
| C           | 0.58978500  | 2.72080700  | 0.00000000 |
| C           | -0.76942300 | 2.33331100  | 0.00000000 |
| C           | -1.02168000 | 0.93305400  | 0.00000000 |
| O           | -2.30884200 | 0.45229000  | 0.00000000 |
| Sc          | -3.93321100 | 1.22761800  | 0.00000000 |
| O           | -3.11151000 | 2.89461900  | 0.00000000 |
| C           | -1.83065400 | 3.33054400  | 0.00000000 |
| C           | -1.61990300 | 4.70487000  | 0.00000000 |
| C           | -2.65044600 | 5.63943500  | 0.00000000 |
| C           | -2.52854300 | 7.04655200  | 0.00000000 |
| C           | -1.27886400 | 7.72730900  | 0.00000000 |
| C           | -1.23920200 | 9.10149600  | 0.00000000 |
| C           | -2.43358500 | 9.83729000  | 0.00000000 |
| C           | -3.67471100 | 9.19426800  | 0.00000000 |
| C           | -3.72424400 | 7.81763000  | 0.00000000 |
| H           | -4.68115000 | 7.30903500  | 0.00000000 |
| H           | -4.58714100 | 9.77609900  | 0.00000000 |
| H           | -2.39184400 | 10.9200450  | 0.00000000 |
| H           | -0.28911400 | 9.61977000  | 0.00000000 |
| H           | -0.35017300 | 7.17242800  | 0.00000000 |
| H           | -3.66523000 | 5.25595600  | 0.00000000 |
| H           | -0.59870100 | 5.05025000  | 0.00000000 |
| H           | 0.85345800  | 3.76792000  | 0.00000000 |
| H           | 2.64176800  | 2.12951000  | 0.00000000 |
| H           | 2.12199200  | -0.29998200 | 0.00000000 |
| H           | -0.24880700 | -1.05324700 | 0.00000000 |

**Table S18.** Sc(2'-hydroxychalcone) complex standard orientation T<sub>1</sub> (coordinates)

| <b>Atom</b> | <b>X</b>    | <b>Y</b>    | <b>Z</b>    |
|-------------|-------------|-------------|-------------|
| C           | 0.00000000  | 0.00000000  | 0.00000000  |
| C           | 0.22993500  | 1.35718900  | 0.01197800  |
| C           | 1.55455300  | 1.85876400  | 0.02202000  |
| C           | 2.62315700  | 1.00354600  | 0.01965600  |
| C           | 2.45011500  | -0.40905800 | 0.00757900  |
| C           | 1.07579600  | -0.89053900 | -0.00303200 |
| O           | 0.81017600  | -2.19463400 | -0.02091300 |
| Sc          | 1.83997800  | -3.75926100 | -0.00317300 |
| O           | 3.36551600  | -2.62296100 | 0.02190800  |
| C           | 3.56212000  | -1.31518200 | 0.00881800  |
| C           | 4.92634800  | -0.86133000 | -0.00003700 |
| C           | 6.02034200  | -1.70043000 | 0.01287500  |
| C           | 7.38419900  | -1.29125100 | 0.00547900  |
| C           | 7.80081000  | 0.07945700  | -0.02111400 |
| C           | 9.13239500  | 0.40107200  | -0.02517900 |
| C           | 10.1037760  | -0.61948100 | -0.00323700 |
| C           | 9.72183200  | -1.97577100 | 0.02265900  |
| C           | 8.39109300  | -2.30591800 | 0.02683600  |
| H           | 8.08724500  | -3.34538300 | 0.04704800  |
| H           | 10.4804090  | -2.74764300 | 0.03919800  |
| H           | 11.1553200  | -0.35837500 | -0.00642400 |
| H           | 9.44530200  | 1.43698600  | -0.04531100 |
| H           | 7.06697100  | 0.87348700  | -0.03849400 |
| H           | 5.83812400  | -2.76851700 | 0.03256200  |
| H           | 5.08514400  | 0.20519300  | -0.01868200 |
| H           | 3.61485400  | 1.42915700  | 0.03130200  |
| H           | 1.72020100  | 2.92816100  | 0.03266300  |
| H           | -0.60503700 | 2.04678200  | 0.01325400  |
| H           | -1.00337800 | -0.40518300 | -0.00895400 |

### I. Procedure for Spectrofluorimetry of 2'-Hydroxychalcone **2**

**General Procedure for Spectrofluorimetry:** Solutions of 2'-hydroxychalcone **2** ( $1.0 \times 10^{-4}$  M) and Sc(III) triflate ( $1.0 \times 10^{-4}$  M) were prepared in acetonitrile, and were combined in a quartz cuvette according to the table below. The samples were then diluted to a final volume of 2 mL, sealed with a rubber septum, sparged for 15 minutes with gas (either N<sub>2</sub> or O<sub>2</sub>), then sealed with parafilm. Emission spectra were obtained upon excitation at 380 nm (to avoid harmonic contamination at >800 nm), and the photon counts were integrated over 10 s with a slit width of 16 nm for all apertures. All data was obtained as background-corrected spectra, then exported and worked up with Microsoft Excel.

| Sample | Components (amount, final conc.)                                                                              | Sparge gas     |
|--------|---------------------------------------------------------------------------------------------------------------|----------------|
| A      | 2'-hydroxychalcone (1.0 mL, $5.0 \times 10^{-5}$ M)                                                           | N <sub>2</sub> |
| B      | 2'-hydroxychalcone (1.0 mL, $5.0 \times 10^{-5}$ M)<br>Sc(III) triflate (500 $\mu$ L, $2.5 \times 10^{-5}$ M) | N <sub>2</sub> |
| C      | 2'-hydroxychalcone (1.0 mL, $5.0 \times 10^{-5}$ M)<br>Sc(III) triflate (500 $\mu$ L, $2.5 \times 10^{-5}$ M) | O <sub>2</sub> |

### J. Cyclic Voltammetry

Cyclic voltammetry was performed on a Pine WaveNow (SN4415109) potentiostat and the data was analyzed on a PC using Pine WaveNow software. All data was obtained at a sweep rate of 50 mV/s using a three electrode setup: Pt wire counter electrode, glassy carbon working electrode, and a Ag/AgNO<sub>3</sub> (0.01 M AgNO<sub>3</sub>, 0.1 M Bu<sub>4</sub>NPF<sub>6</sub> in CH<sub>3</sub>CN) quasi reference electrode containing a polished silver wire immersed in the electrolyte solution in a glass cuvette. Solutions of 2'-hydroxychalcone with or without Sc(III) (1 mM in CH<sub>3</sub>CN, 5 mL total volume) with 0.1 M Bu<sub>4</sub>NPF<sub>6</sub> of supporting electrolyte. The solutions were sparged with nitrogen for ten minutes prior to acquiring all CV data. All electrochemical potentials were obtained relative to Ag/AgNO<sub>3</sub>, and referenced to ferrocene as an internal standard by addition of ferrocene and obtaining a CV. The data was subsequently adjusted to the saturated calomel electrode (SCE) by addition of +0.40 V.

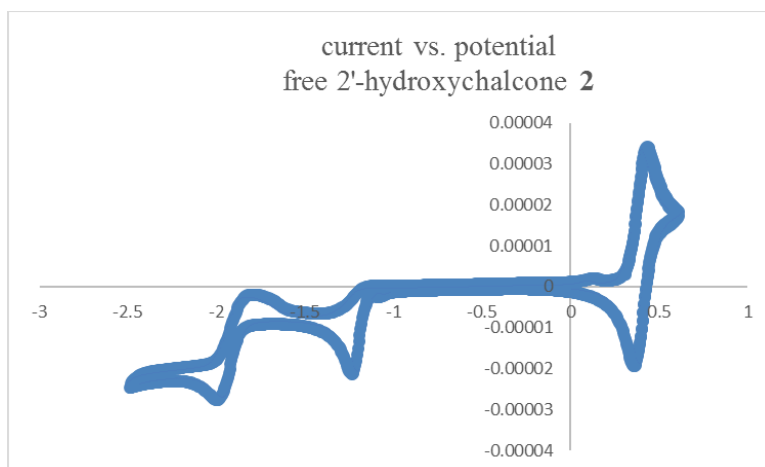

**Fig. S5.** CV of 2'-hydroxychalcone 2 (1mM in MeCN).

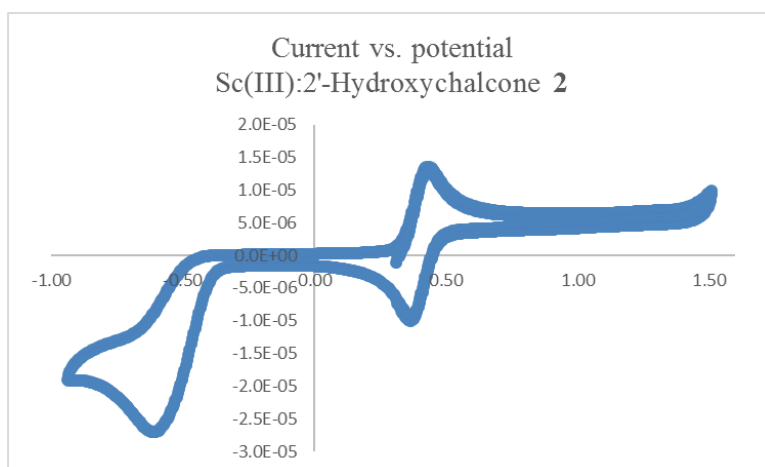

**Fig. S6.** CV of 2'-hydroxychalcone (1mM in MeCN) and Sc(OTf)<sub>3</sub> (1mM in MeCN)

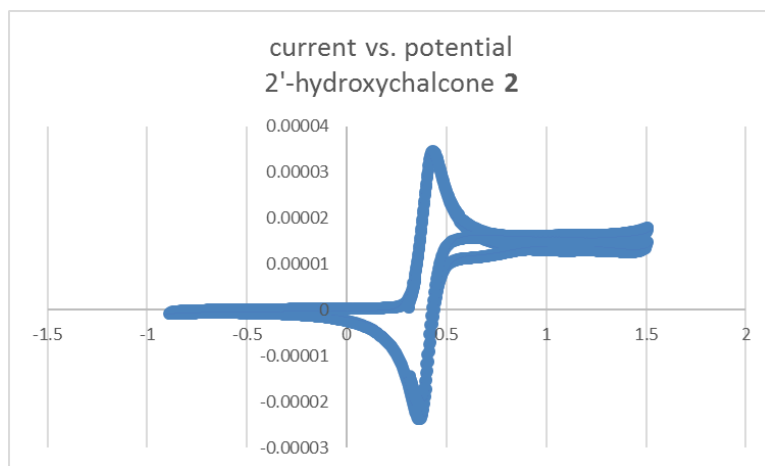

**Fig. S7.** CV of 2'-hydroxychalcone 2 (1mM in MeCN).

K. SFC and HPLC Chromatograms

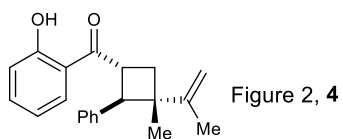

**Racemic** (Daicel CHIRALPAK® OD-H, gradient 5-50% *i*-PrOH, 4.0 mL/min, 241 nm)

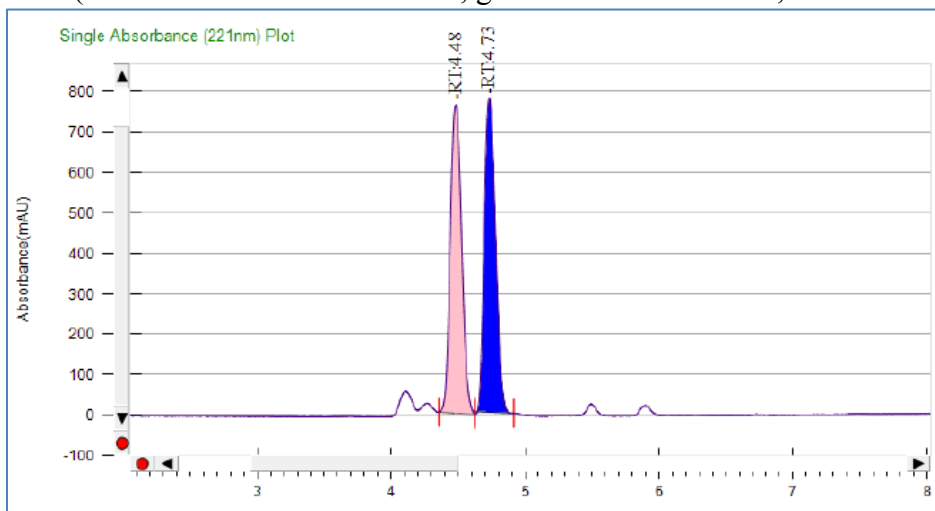

| Peak No       | % Area  | Area       | RT (min) | Height (mV) |
|---------------|---------|------------|----------|-------------|
| 1             | 49.3847 | 5049.7432  | 4.48     | 762.6925    |
| 2             | 50.6153 | 5175.5703  | 4.73     | 776.1804    |
| <b>Total:</b> | 100     | 10225.3162 |          |             |

**Enantioenriched**

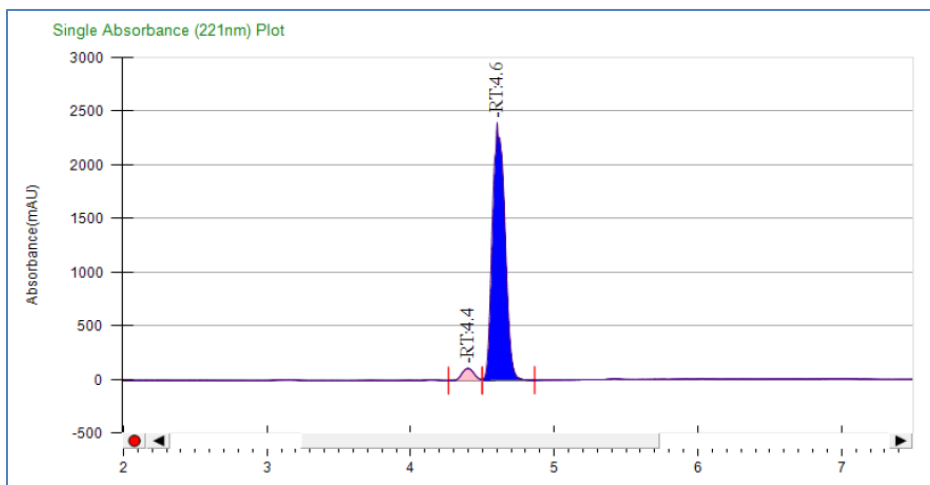

| Peak No       | % Area  | Area       | RT (min) | Height (mV) |
|---------------|---------|------------|----------|-------------|
| 1             | 3.3917  | 449.3238   | 4.40     | 85.0888     |
| 2             | 96.6083 | 12798.5527 | 4.61     | 2131.6588   |
| <b>Total:</b> | 100     | 13247.8765 |          |             |



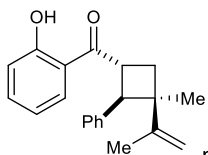

Figure 2, 4  
minor diastereomer

**Racemic** ((Daicel CHIRALPAK<sup>®</sup> OD-H, gradient 5-20% MeOH, 3.0 mL/min, 245 nm)

MaxAbsorbance Plot

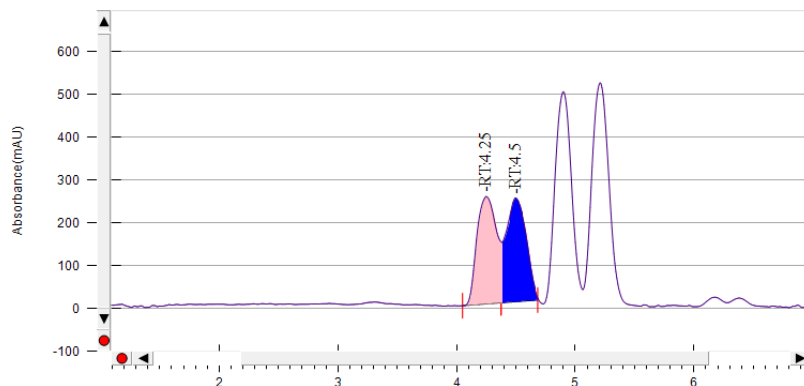

| Peak No       | % Area  | Area      | RT (min) | Height (mV) |
|---------------|---------|-----------|----------|-------------|
| 1             | 50.7708 | 2836.4415 | 4.25     | 251.423     |
| 2             | 49.2292 | 2750.3108 | 4.50     | 242.9719    |
| <b>Total:</b> | 100     | 5586.7523 |          |             |

**Enantioenriched**

Single Absorbance (255nm) Plot

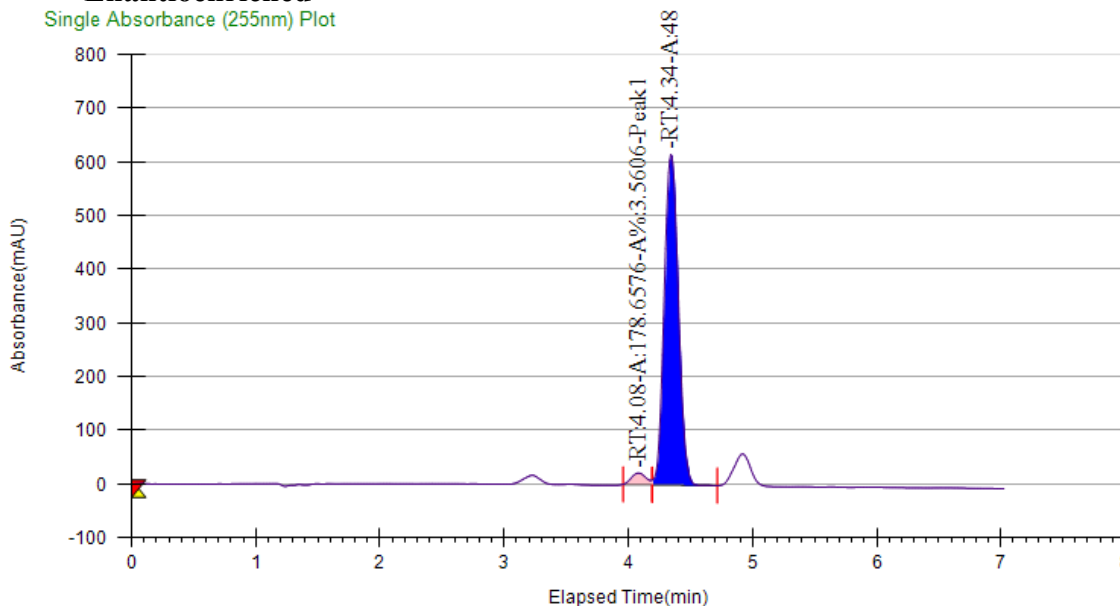

| Peak No       | % Area  | Area      | RT (min) | Height (mV) |
|---------------|---------|-----------|----------|-------------|
| 1             | 3.5606  | 178.6576  | 4.08     | 21.3836     |
| 2             | 96.4394 | 4838.9782 | 4.34     | 615.7895    |
| <b>Total:</b> | 100     | 5017.6358 |          |             |

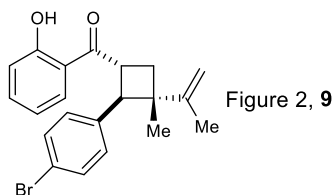

**Racemic** (Daicel CHIRALPAK® OD-H, 3% MeOH, 3 mL/min, 248 nm)

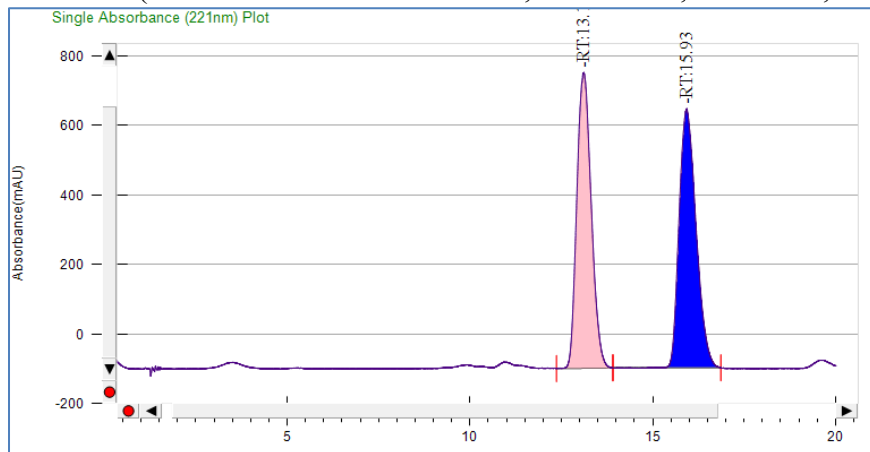

| Peak No       | % Area  | Area       | RT (min) | Height (mV) |
|---------------|---------|------------|----------|-------------|
| 1             | 49.6479 | 23968.7255 | 13.11    | 881.1843    |
| 2             | 50.3521 | 24308.6467 | 15.92    | 769.6972    |
| <b>Total:</b> | 100     | 48277.3722 |          |             |

**Enantioenriched**

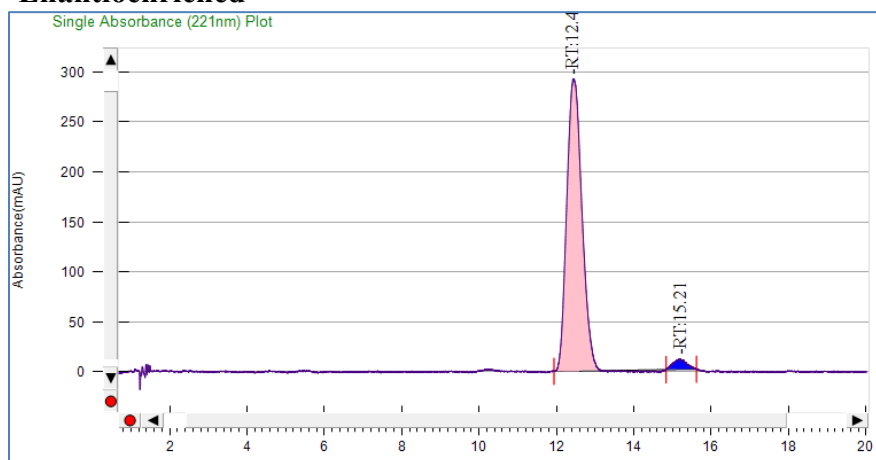

| Peak No       | % Area  | Area      | RT (min) | Height (mV) |
|---------------|---------|-----------|----------|-------------|
| 1             | 96.9448 | 7966.602  | 12.44    | 292.086     |
| 2             | 3.0522  | 251.0631  | 15.21    | 10.2578     |
| <b>Total:</b> | 100     | 8217.6651 |          |             |

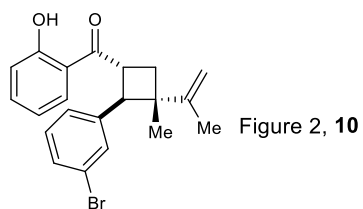

**Racemic** (Daicel CHIRALPAK® OJ-H, 8% solvent, 3 mL/min, 245 nm)

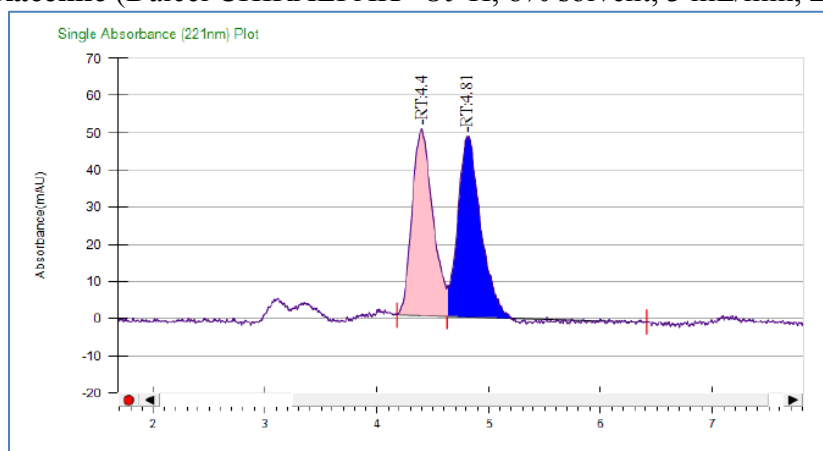

| Peak No       | % Area  | Area     | RT (min) | Height (mV) |
|---------------|---------|----------|----------|-------------|
| 1             | 50.2241 | 356.1117 | 4.40     | 50.2729     |
| 2             | 49.7759 | 352.9341 | 4.81     | 48.5393     |
| <b>Total:</b> | 100     | 709.0458 |          |             |

**Enantioenriched**

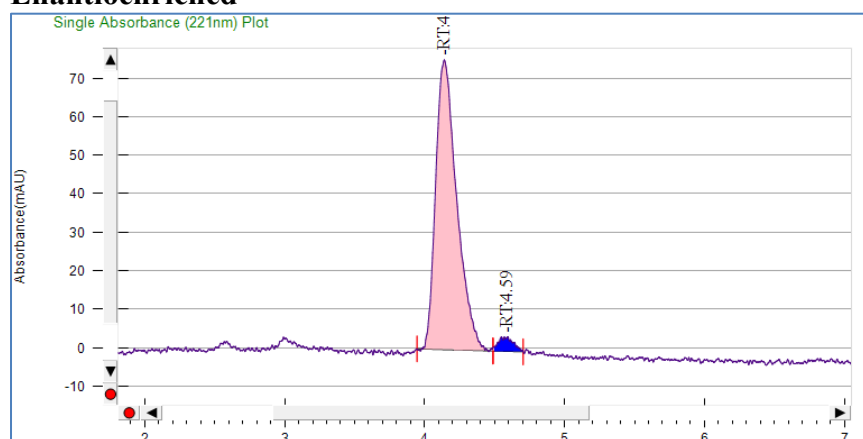

| Peak No       | % Area  | Area     | RT (min) | Height (mV) |
|---------------|---------|----------|----------|-------------|
| 1             | 96.5757 | 788.8854 | 4.14     | 75.2966     |
| 2             | 3.4243  | 27.9717  | 4.59     | 3.808       |
| <b>Total:</b> | 100     | 816.8571 |          |             |

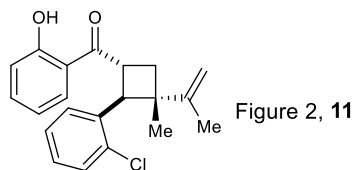

**Racemic** (Daicel CHIRALPAK® OJ-H, 8% *i*-PrOH, 4 mL/min, 250 nm)

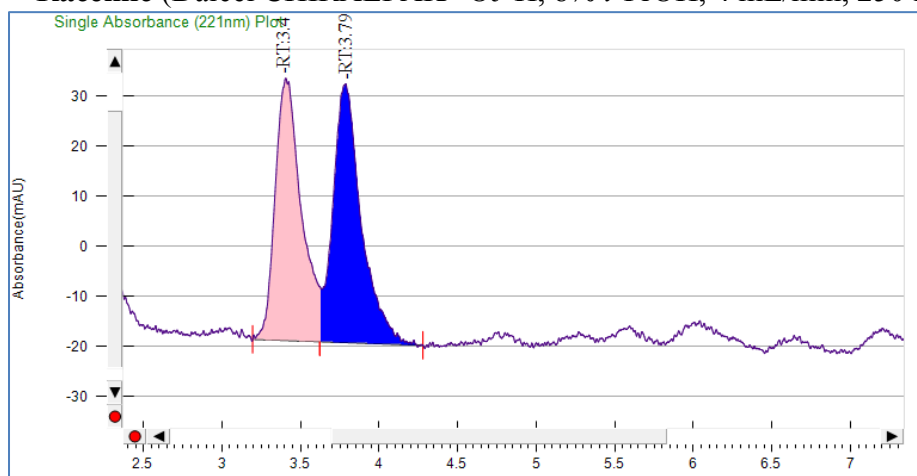

| Peak No       | % Area  | Area      | RT (min) | Height (mV) |
|---------------|---------|-----------|----------|-------------|
| 1             | 49.9313 | 626.8762  | 3.40     | 52.2733     |
| 2             | 50.0687 | 628.6011  | 3.79     | 51.6351     |
| <b>Total:</b> | 100     | 1255.4773 |          |             |

**Enantioenriched**

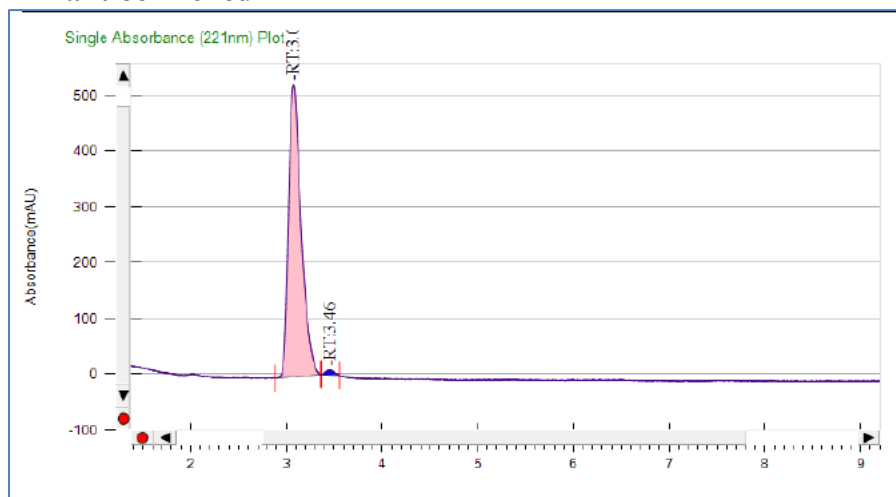

| Peak No       | % Area  | Area      | RT (min) | Height (mV) |
|---------------|---------|-----------|----------|-------------|
| 1             | 98.9005 | 4820.0261 | 3.08     | 523.0884    |
| 2             | 1.0995  | 53.586    | 3.46     | 8.539       |
| <b>Total:</b> | 100     | 4873.6121 |          |             |

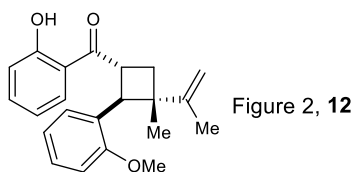

**Racemic** (Daicel CHIRALPAK® OJ-H, 5% MeOH, 3 mL/min, 255 nm)

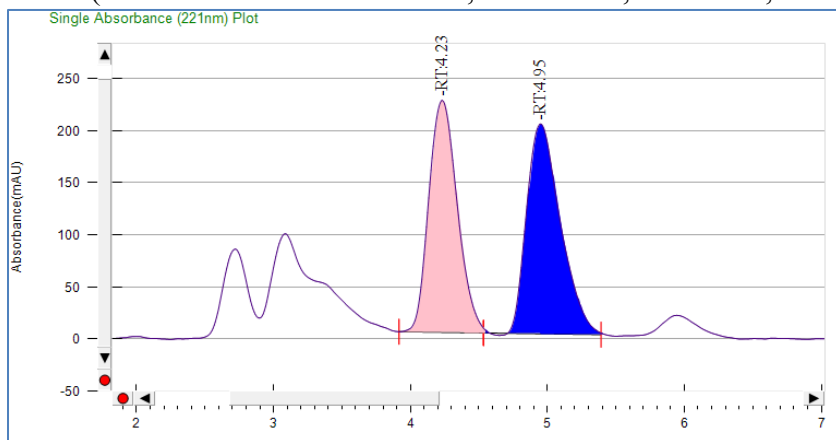

| Peak No       | % Area  | Area      | RT (min) | Height (mV) |
|---------------|---------|-----------|----------|-------------|
| 1             | 48.6411 | 3699.6364 | 4.23     | 267.2962    |
| 2             | 51.3589 | 3906.3558 | 4.96     | 237.2921    |
| <b>Total:</b> | 100     | 7605.9922 |          |             |

**Enantioenriched** (Blue LED Conditions)

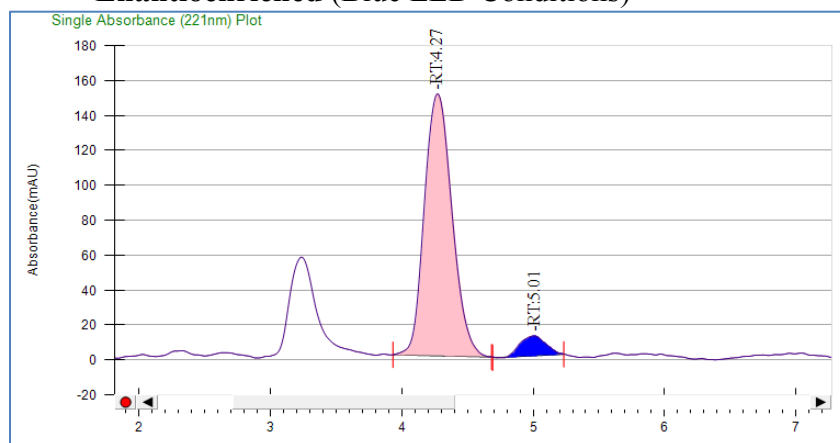

| Peak No       | % Area | Area      | RT (min) | Height (mV) |
|---------------|--------|-----------|----------|-------------|
| 1             | 92.291 | 2195.8546 | 4.27     | 149.9284    |
| 2             | 7.709  | 183.4169  | 5.01     | 11.5605     |
| <b>Total:</b> | 100    | 2379.2715 |          |             |

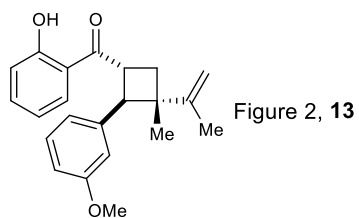

**Racemic** (Daicel CHIRALPAK® OJ-H, 3% (25% i-PrOH:Hex), 3 mL/min, 245 nm)

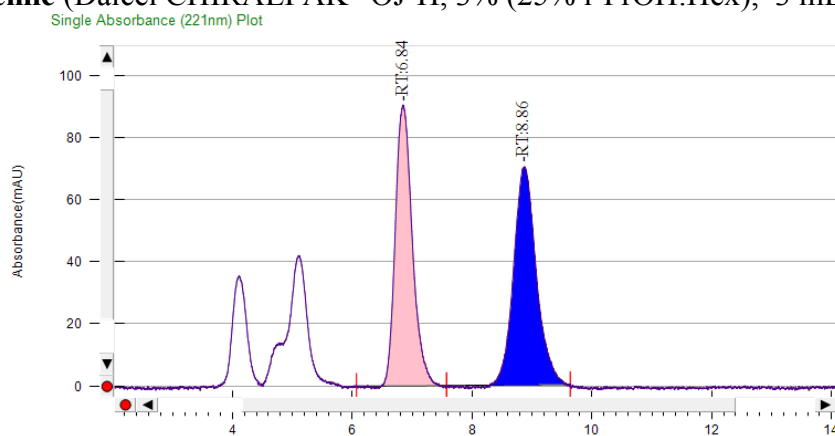

| Peak No       | % Area  | Area      | RT (min) | Height (mV) |
|---------------|---------|-----------|----------|-------------|
| 1             | 49.1343 | 1777.6199 | 6.84     | 90.3663     |
| 2             | 50.8657 | 1840.2607 | 8.86     | 70.2086     |
| <b>Total:</b> | 100     | 3617.8806 |          |             |

**Enantioenriched** (Blue LED conditions)

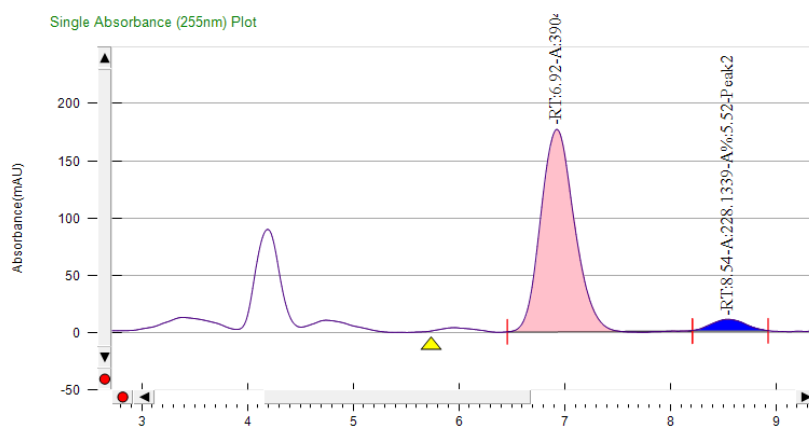

| Peak No       | % Area  | Area      | RT (min) | Height (mV) |
|---------------|---------|-----------|----------|-------------|
| 1             | 93.7763 | 5103.1986 | 6.92     | 84.1899     |
| 2             | 6.2237  | 221.7657  | 8.52     | 5.2224      |
| <b>Total:</b> | 100     | 5324.9643 |          |             |

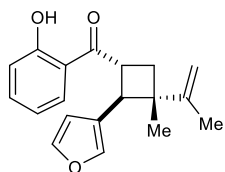

Figure 2, 14

**Racemic** (Daicel CHIRALPAK® OJ-H, Shimadzu HPLC, gradient 1-10% (*i*-PrOH:Hex), 0.7 mL/min, 265 nm)

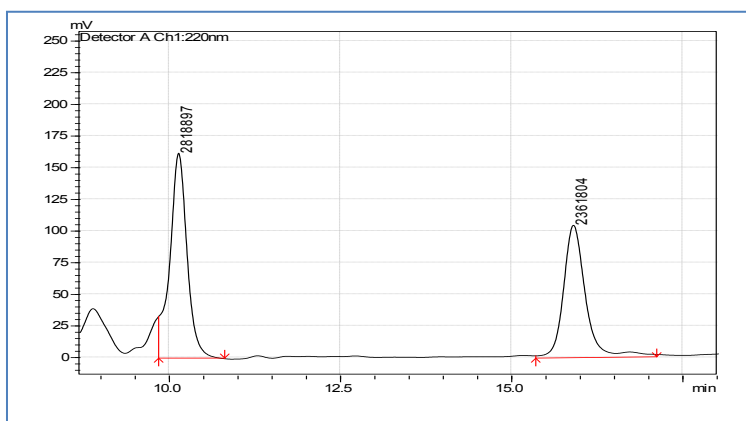

| Peak No       | % Area  | Area    | RT (min) | Height (mV) |
|---------------|---------|---------|----------|-------------|
| 1             | 54.4115 | 2818897 | 10.05    | 165.1934    |
| 2             | 45.5885 | 2361804 | 15.19    | 108.2456    |
| <b>Total:</b> | 100     | 5180701 |          |             |

**Enantioenriched** (Blue LED conditions)

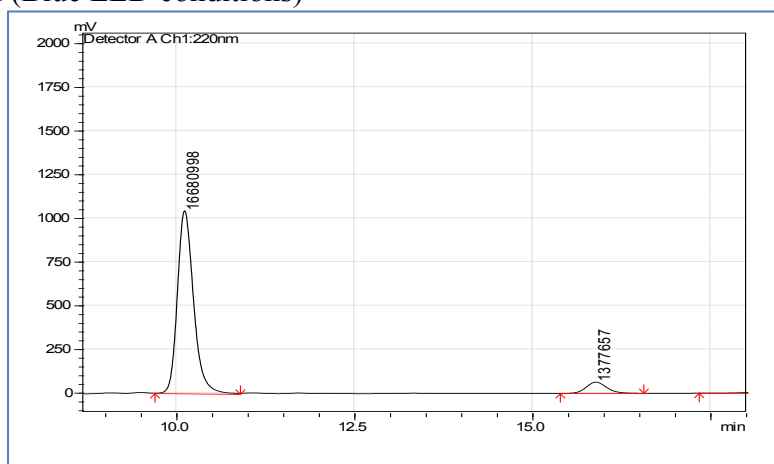

| Peak No       | % Area  | Area     | RT (min) | Height (mV) |
|---------------|---------|----------|----------|-------------|
| 1             | 92.3712 | 16680998 | 10.06    | 1050.3465   |
| 2             | 7.6288  | 1377657  | 15.18    | 100.2873    |
| <b>Total:</b> | 100     | 18058655 |          |             |

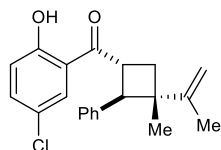

Figure 2, 15

**Racemic** (Daicel CHIRALPAK® OD-H, gradient 5 - 50% MeOH, 3 mL/min, 248 nm)

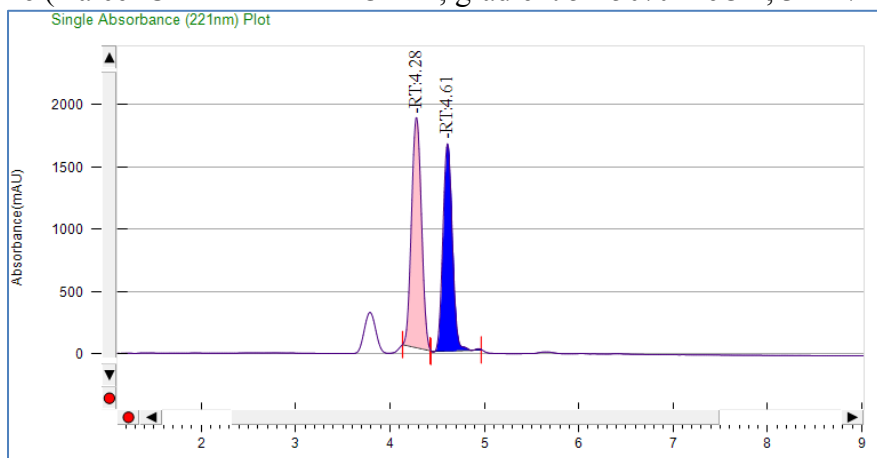

| Peak No       | % Area  | Area       | RT (min) | Height (mV) |
|---------------|---------|------------|----------|-------------|
| 1             | 51.9812 | 13494.8102 | 4.28     | 1843.2347   |
| 2             | 48.0188 | 12466.1425 | 4.61     | 1661.4423   |
| <b>Total:</b> | 100     | 25960.9527 |          |             |

**Enantioenriched**

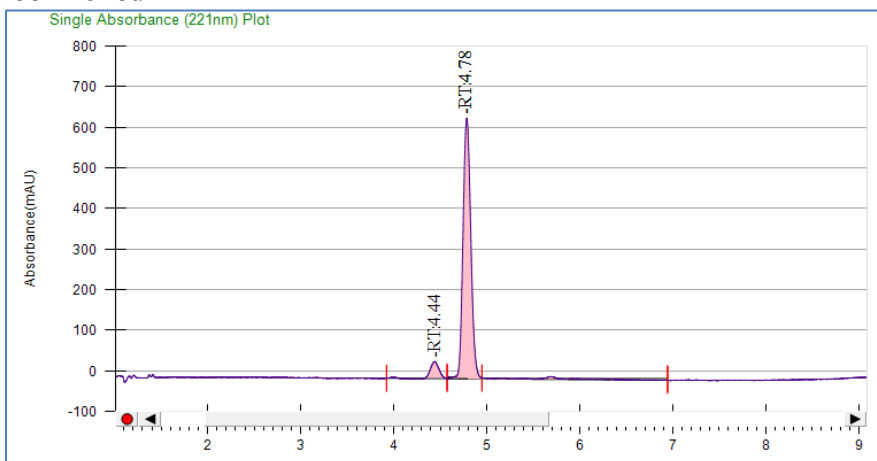

| Peak No       | % Area  | Area      | RT (min) | Height (mV) |
|---------------|---------|-----------|----------|-------------|
| 1             | 5.8109  | 67.6433   | 4.41     | 11.6444     |
| 2             | 94.1891 | 1096.4349 | 4.78     | 189.7383    |
| <b>Total:</b> | 100     | 1164.0782 |          |             |



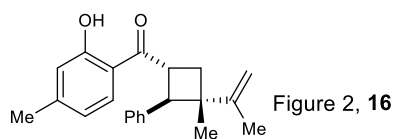

**Racemic** (Daicel CHIRALPAK® OD-H, 4% *i*-PrOH, 5 mL/min, 255 nm)

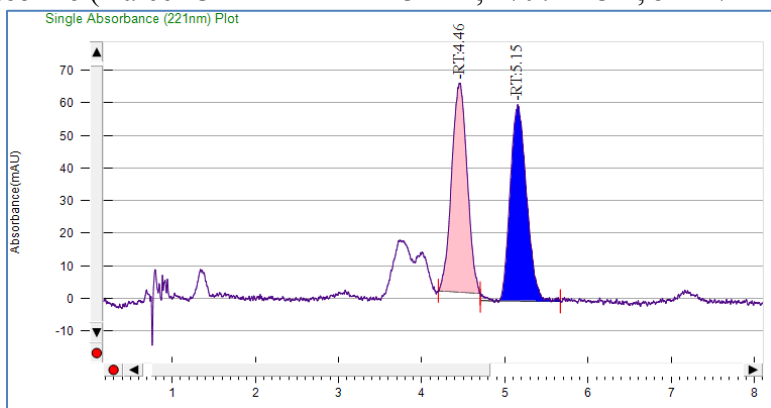

| Peak No       | % Area  | Area     | RT (min) | Height (mV) |
|---------------|---------|----------|----------|-------------|
| 1             | 51.5668 | 923.8581 | 4.46     | 71.3989     |
| 2             | 48.4332 | 867.7179 | 5.15     | 65.109      |
| <b>Total:</b> | 100     | 1791.576 |          |             |

**Enantioenriched**

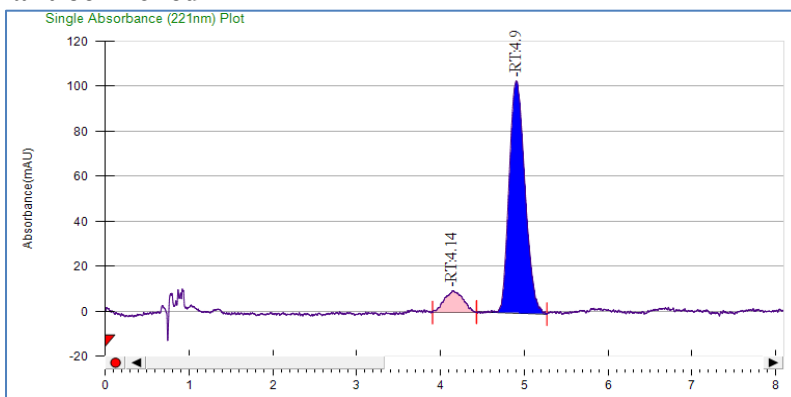

| Peak No       | % Area  | Area      | RT (min) | Height (mV) |
|---------------|---------|-----------|----------|-------------|
| 1             | 8.6435  | 149.9704  | 4.14     | 9.7192      |
| 2             | 91.3565 | 1585.0979 | 4.90     | 103.2002    |
| <b>Total:</b> | 100     | 1735.0683 |          |             |

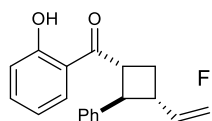

Figure 2, 17

**Racemic** (Daicel CHIRALPAK® OJ-H, 5% MeOH, 5 mL/min, 245 nm)

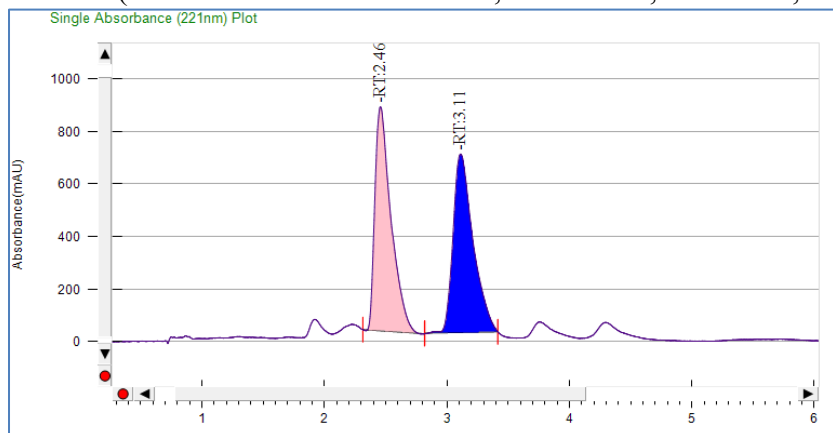

| Peak No       | % Area  | Area       | RT (min) | Height (mV) |
|---------------|---------|------------|----------|-------------|
| 1             | 50.0337 | 8987.9841  | 2.46     | 990.8456    |
| 2             | 49.9663 | 8975.8691  | 3.11     | 785.2963    |
| <b>Total:</b> | 100     | 17963.8532 |          |             |

**Enantioenriched**

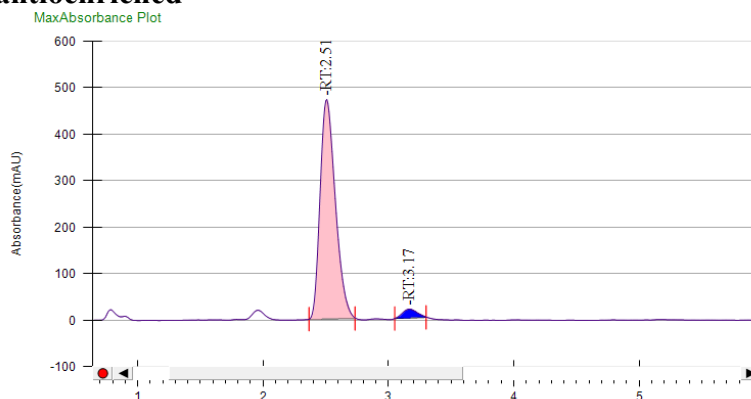

| Peak No       | % Area  | Area      | RT (min) | Height (mV) |
|---------------|---------|-----------|----------|-------------|
| 1             | 96.2704 | 3904.6574 | 2.51     | 472.3205    |
| 2             | 3.7296  | 151.2699  | 3.17     | 19.1053     |
| <b>Total:</b> | 100     | 4055.9273 |          |             |

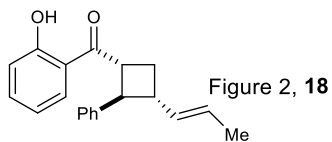

**Racemic** (Daicel CHIRALPAK® AD-H, gradient 1-6% (*i*-PrOH:Hex), Shimadzu HPLC, 0.4 mL/min, 265 nm)

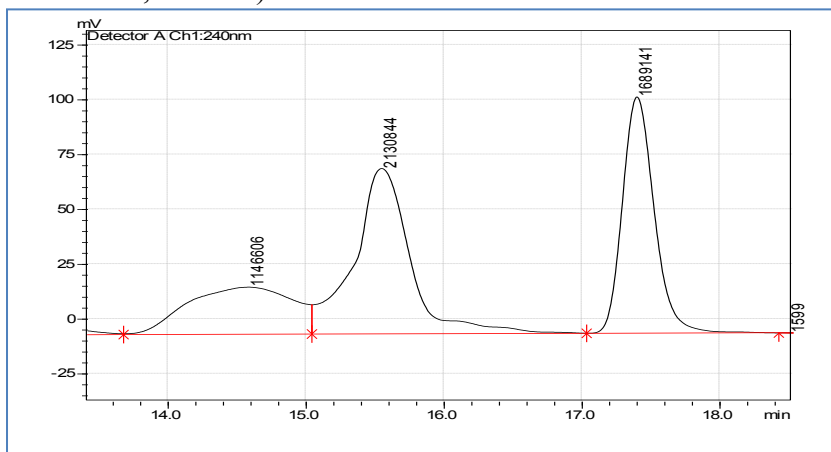

| Peak No       | % Area  | Area    | RT (min) | Height (mV) |
|---------------|---------|---------|----------|-------------|
| 1             | 55.7815 | 2130844 | 15.67    | 65.9856     |
| 2             | 44.2185 | 1689141 | 17.46    | 103.4762    |
| <b>Total:</b> | 100     | 3819985 |          |             |

**Enantioenriched**

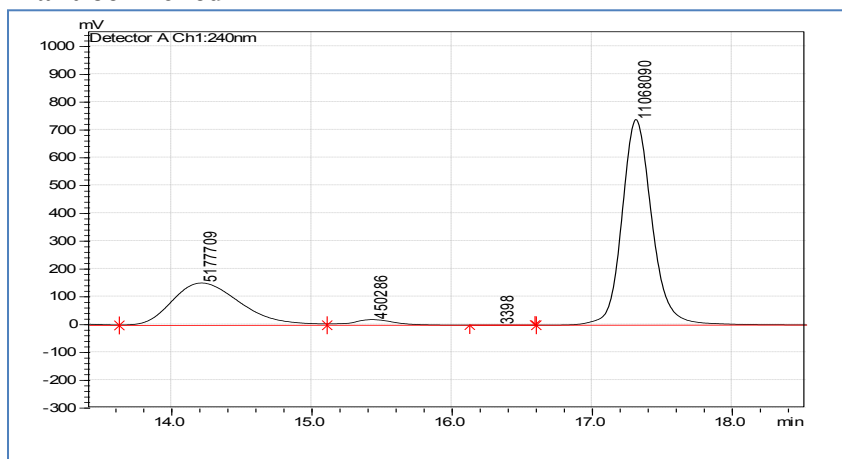

| Peak No       | % Area  | Area     | RT (min) | Height (mV) |
|---------------|---------|----------|----------|-------------|
| 1             | 3.9093  | 450286   | 15.67    | 39.6521     |
| 2             | 96.0910 | 11068090 | 17.46    | 741.9541    |
| <b>Total:</b> | 100     | 11518376 |          |             |

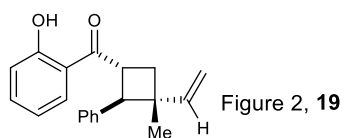

**Racemic** (Daicel CHIRALPAK® OJ-H, gradient 5-50% (25% *i*-PrOH:Hex), 3 mL/min, 243 nm)

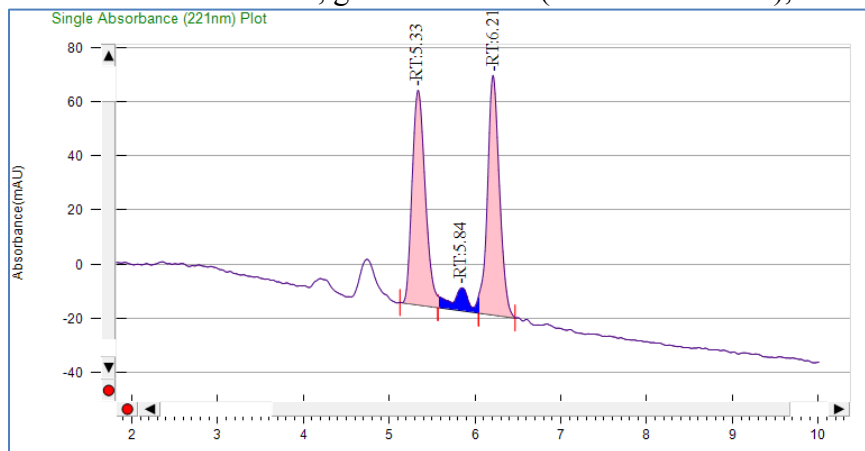

| Peak No       | % Area     | Area             | RT (min) | Height (mV) |
|---------------|------------|------------------|----------|-------------|
| 1             | 49.7649    | 840.1165         | 5.33     | 79.1538     |
| 2             | 50.2351    | 848.0568         | 6.21     | 88.3866     |
| <b>Total:</b> | <b>100</b> | <b>1688.1733</b> |          |             |

**Enantioenriched**

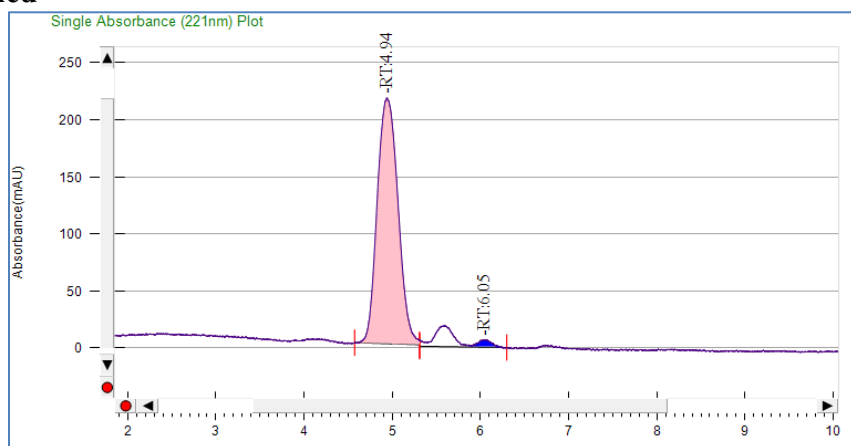

| Peak No       | % Area     | Area             | RT (min) | Height (mV) |
|---------------|------------|------------------|----------|-------------|
| 1             | 95.9786    | 3520.4287        | 4.94     | 215.3677    |
| 2             | 4.0214     | 147.5009         | 6.05     | 6.132       |
| <b>Total:</b> | <b>100</b> | <b>3667.9377</b> |          |             |

# L. NMR Spectra

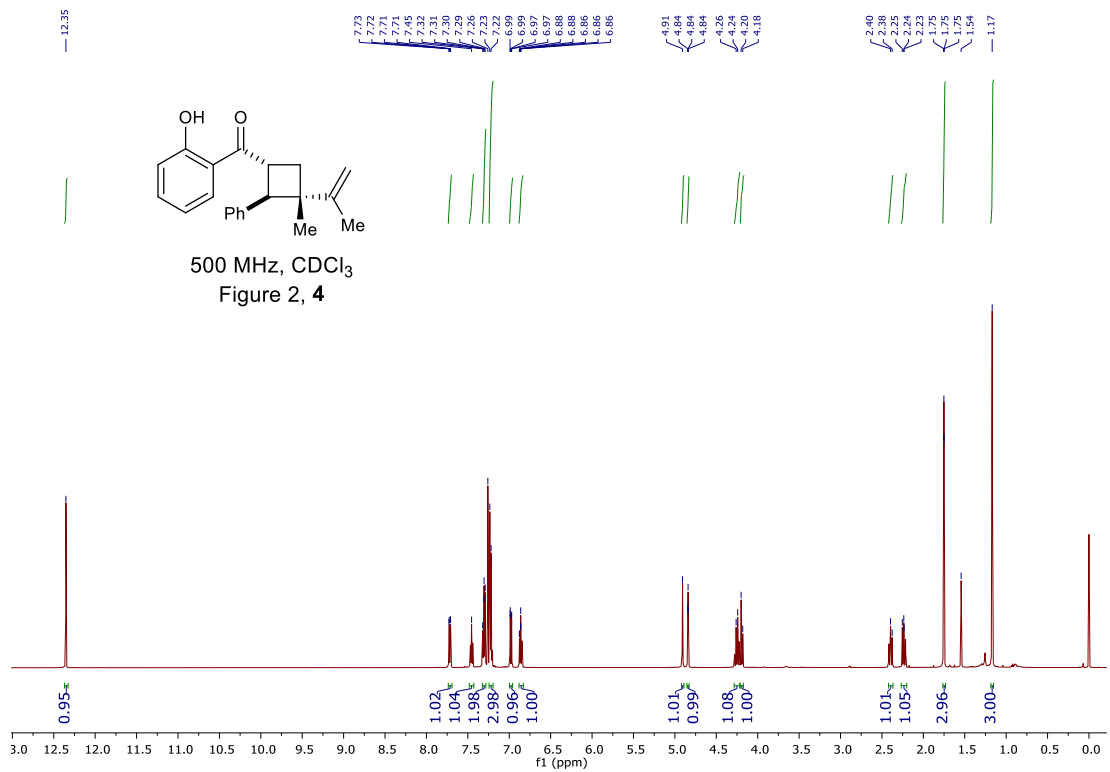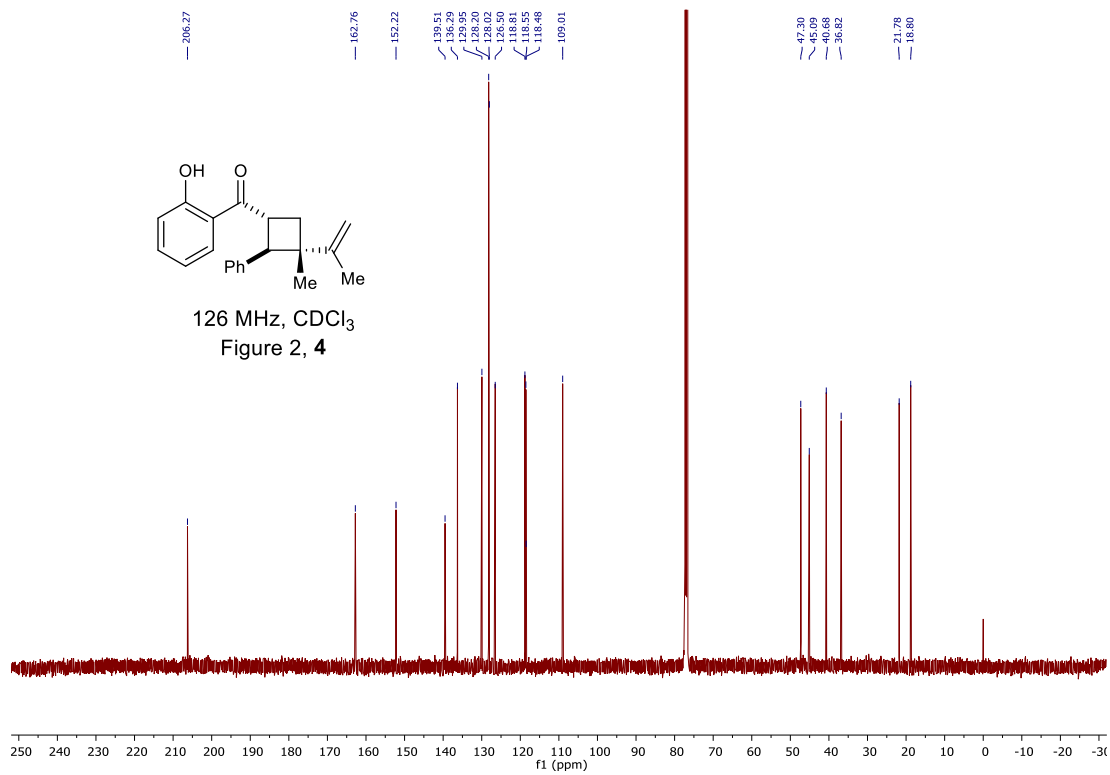

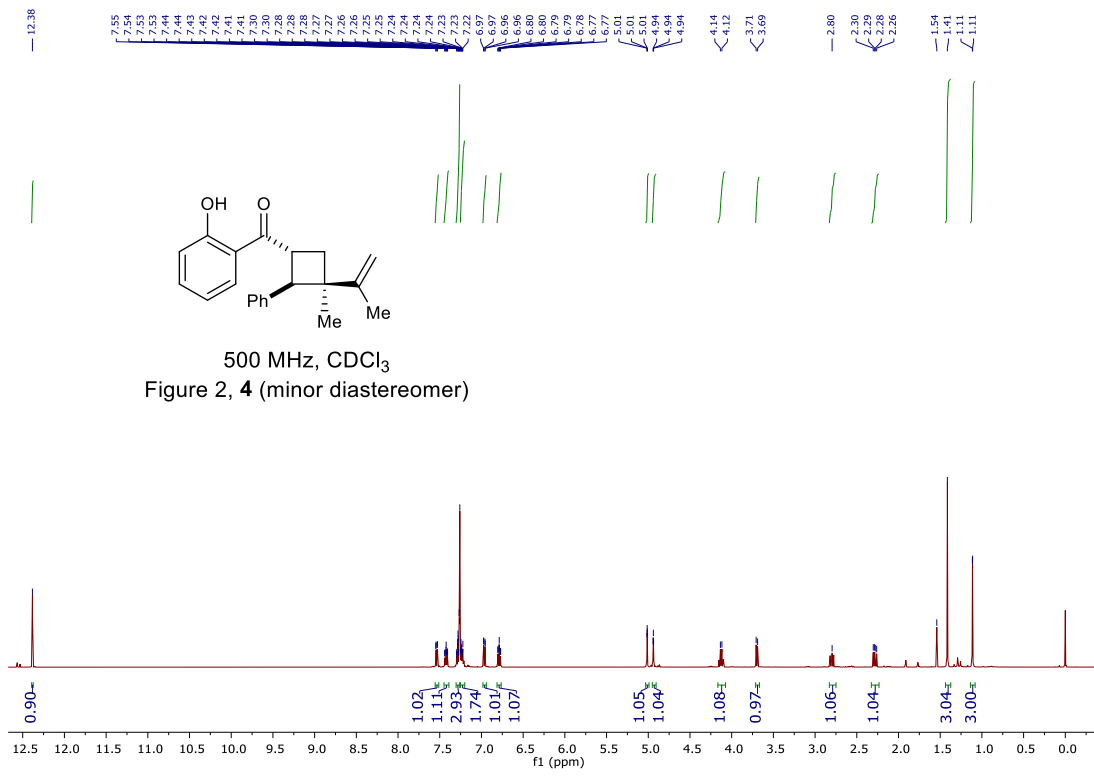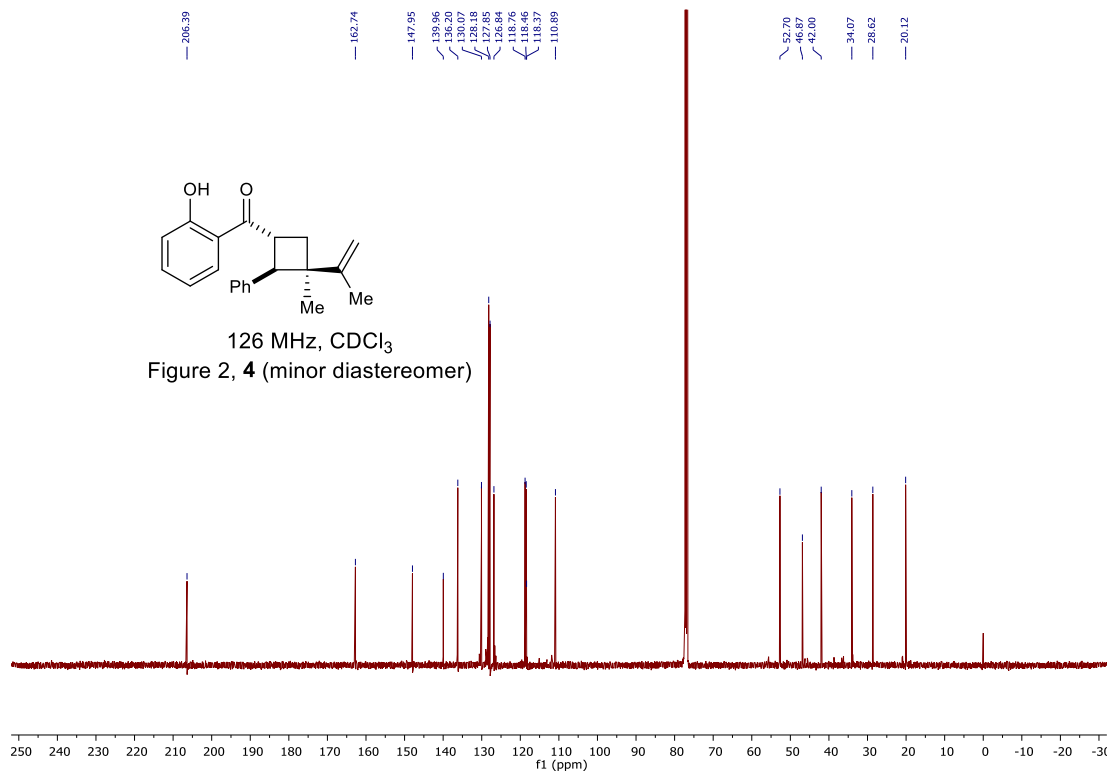

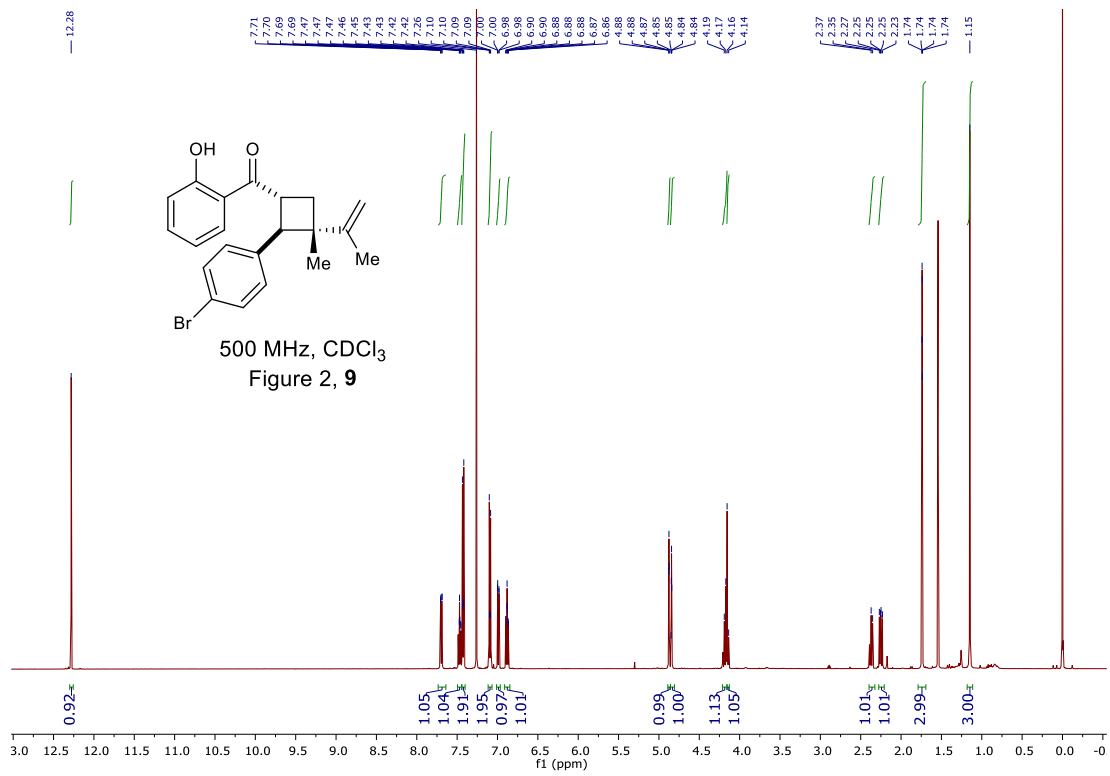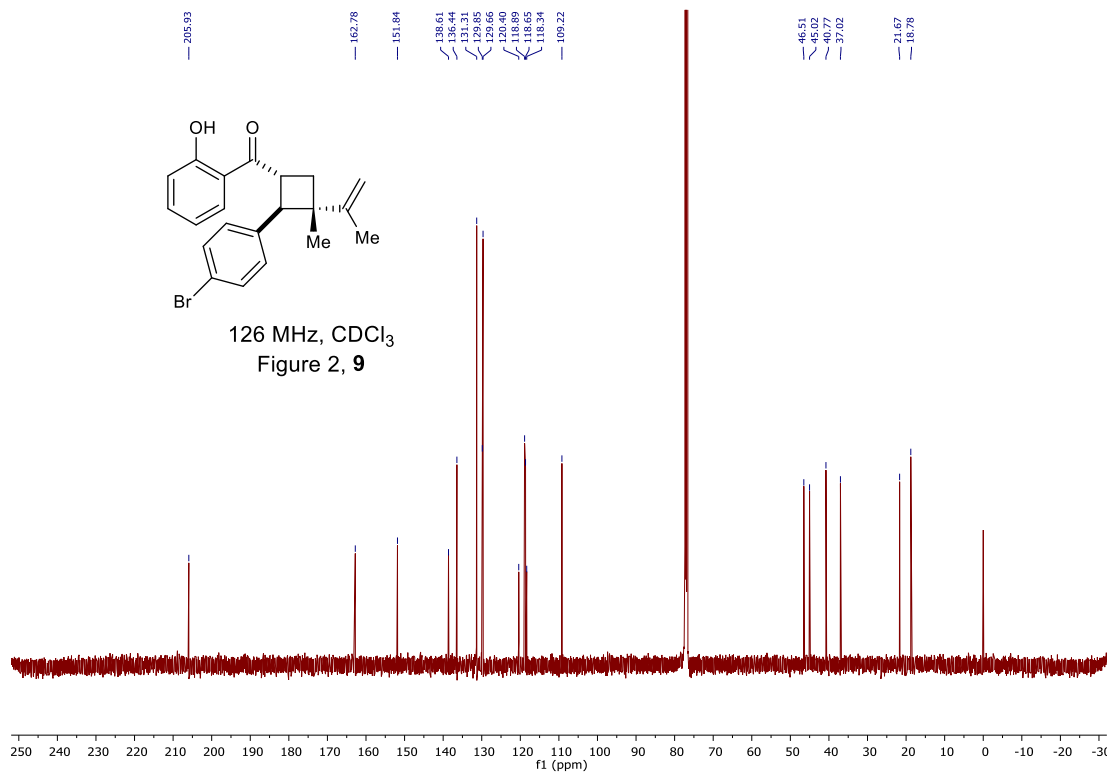

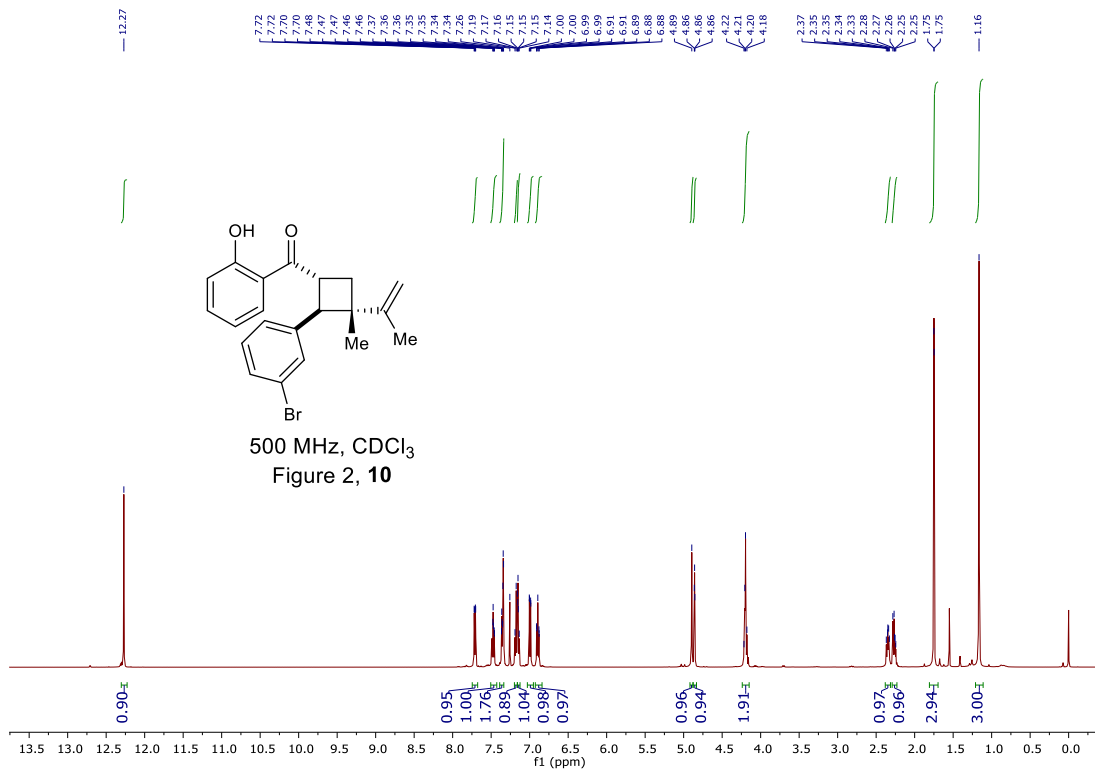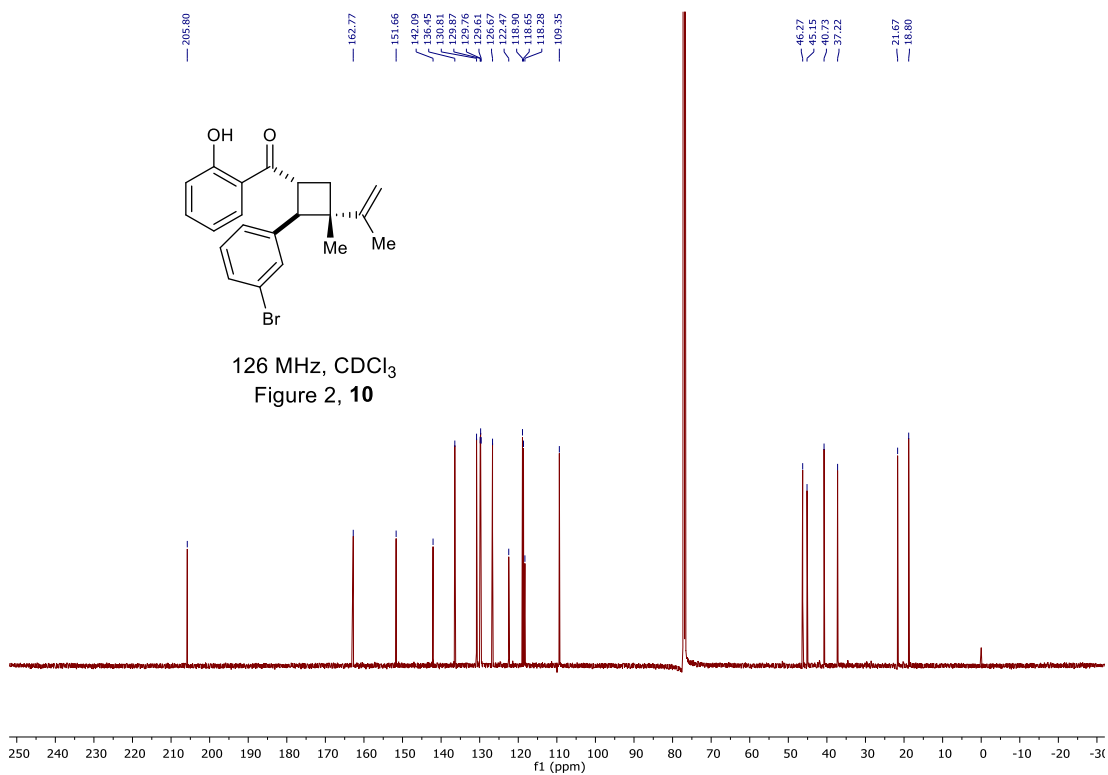



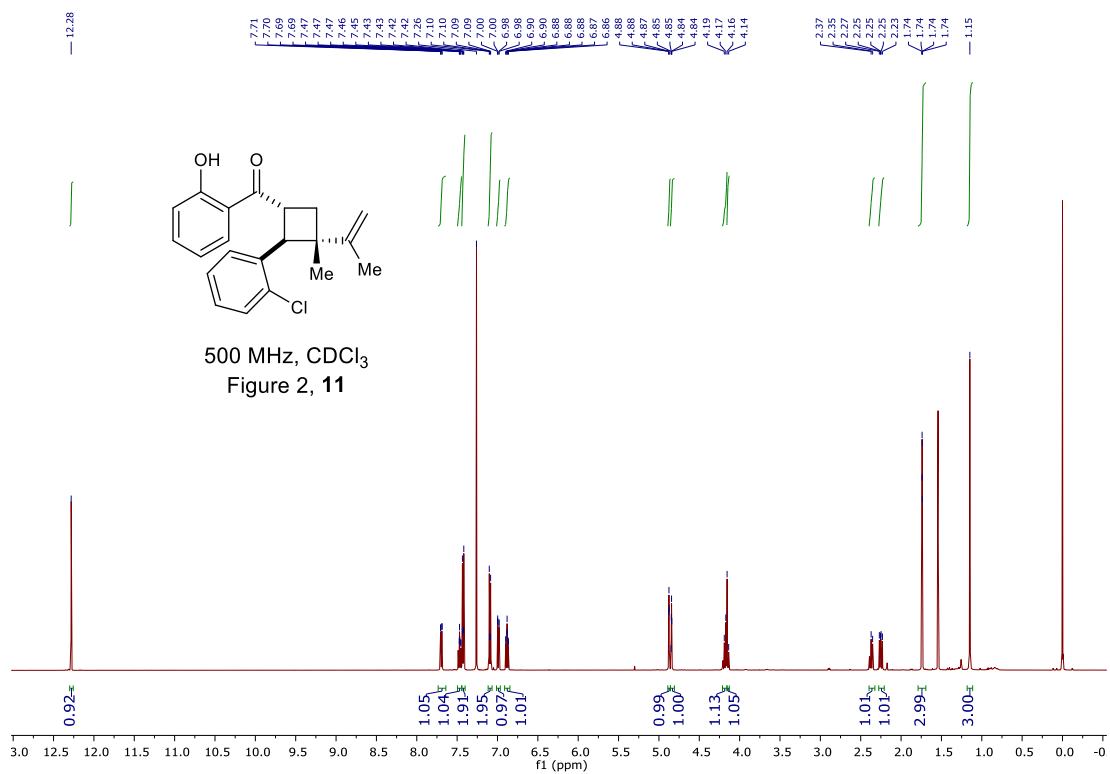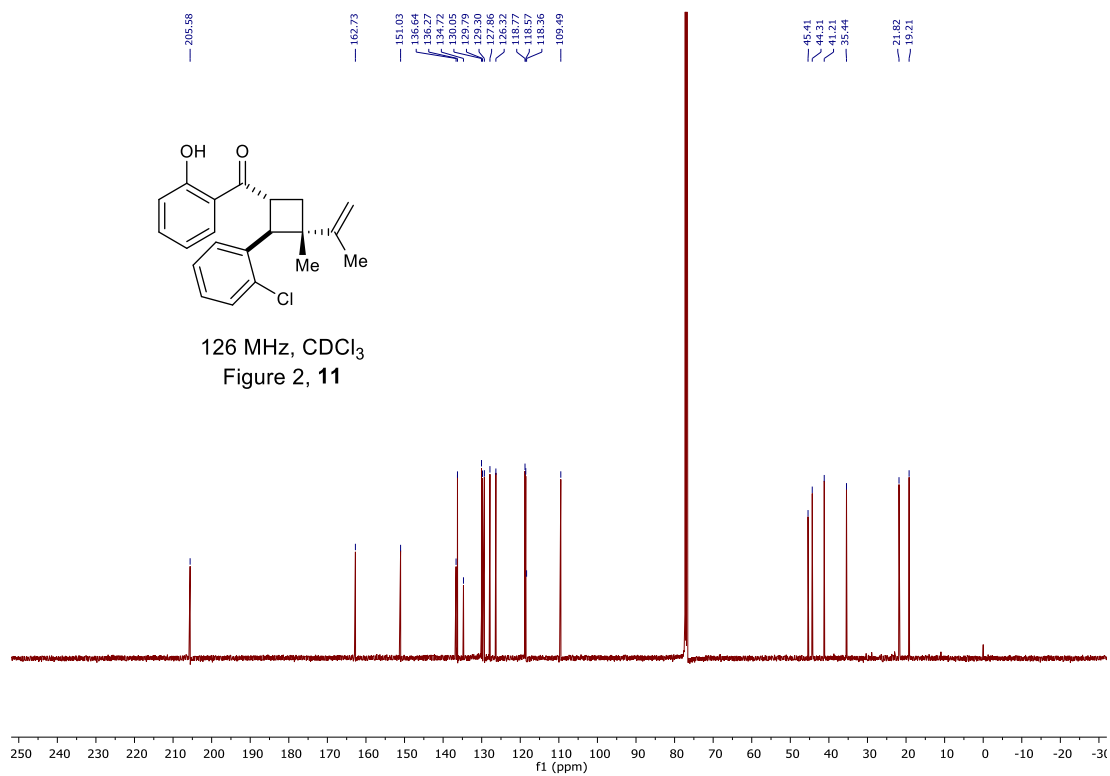

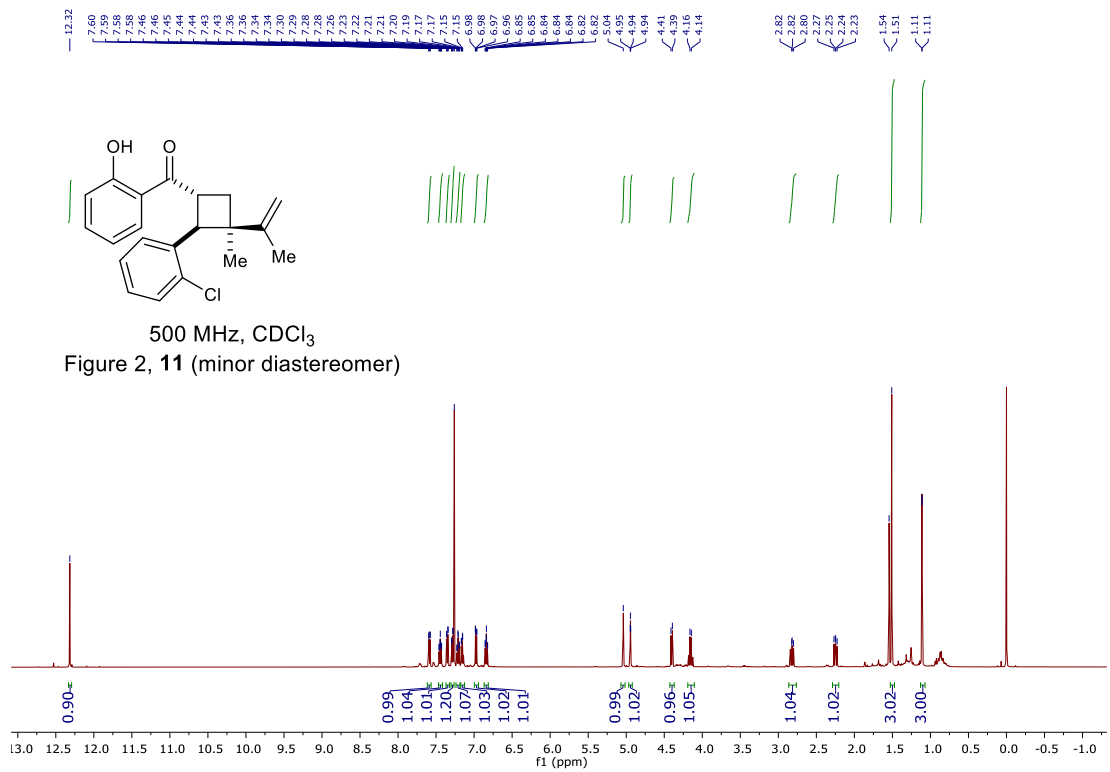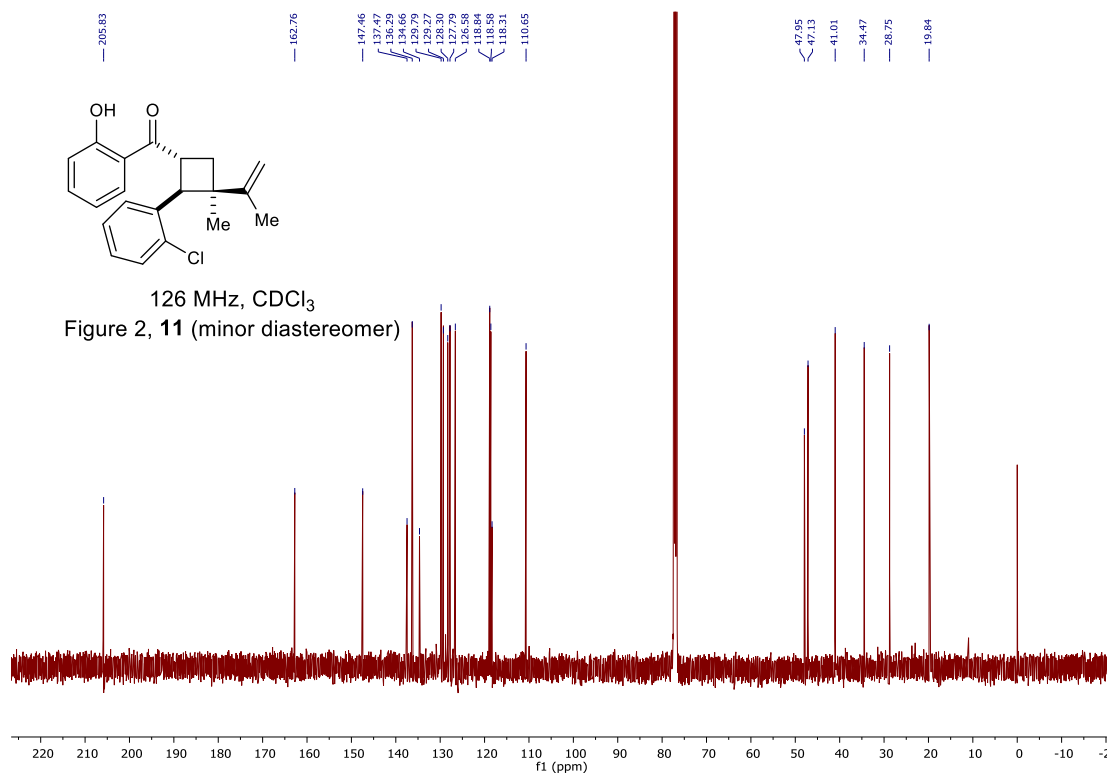

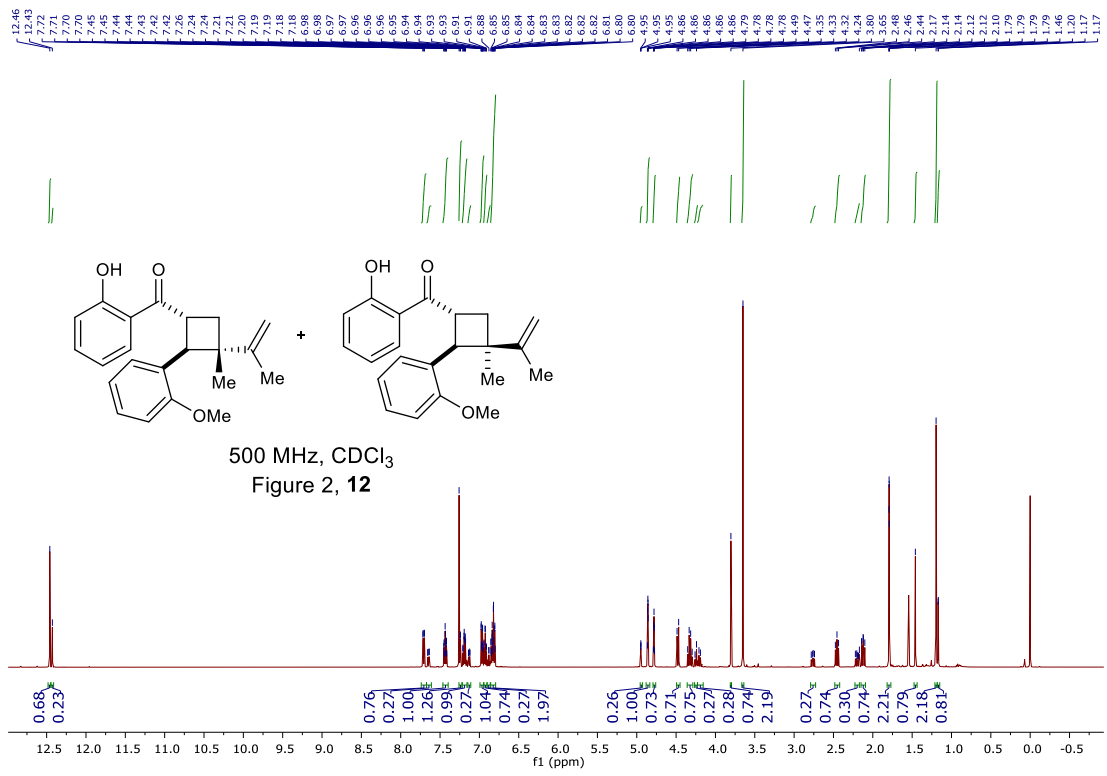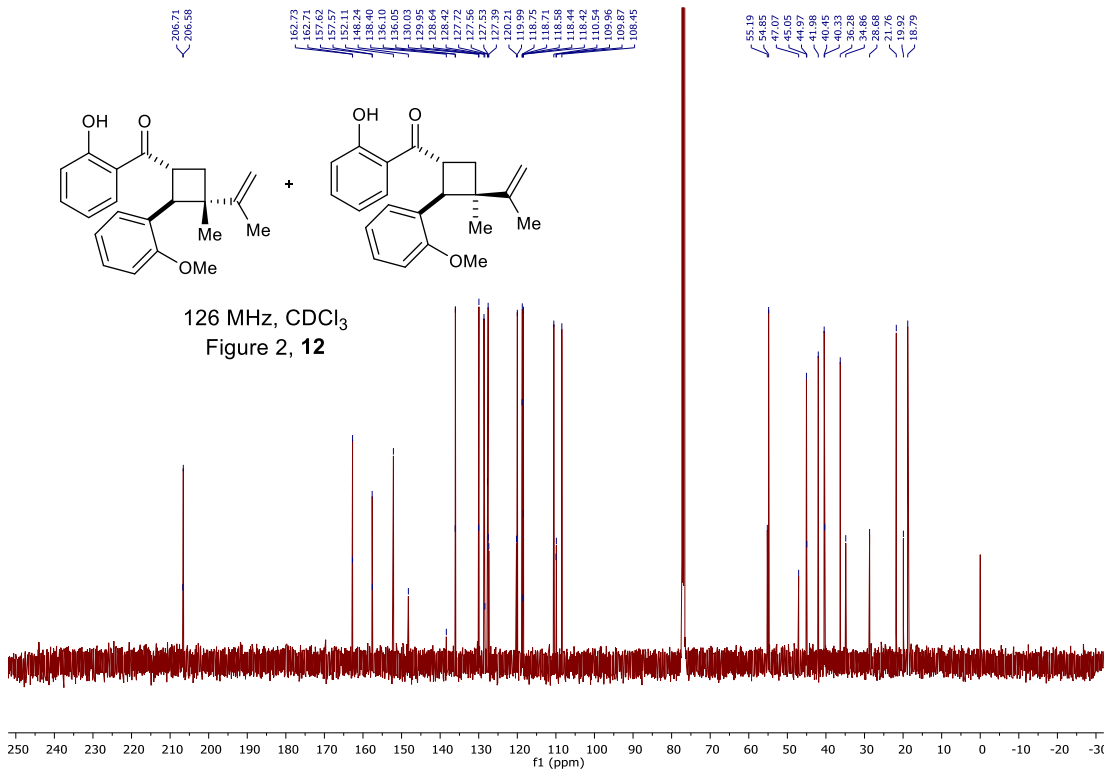

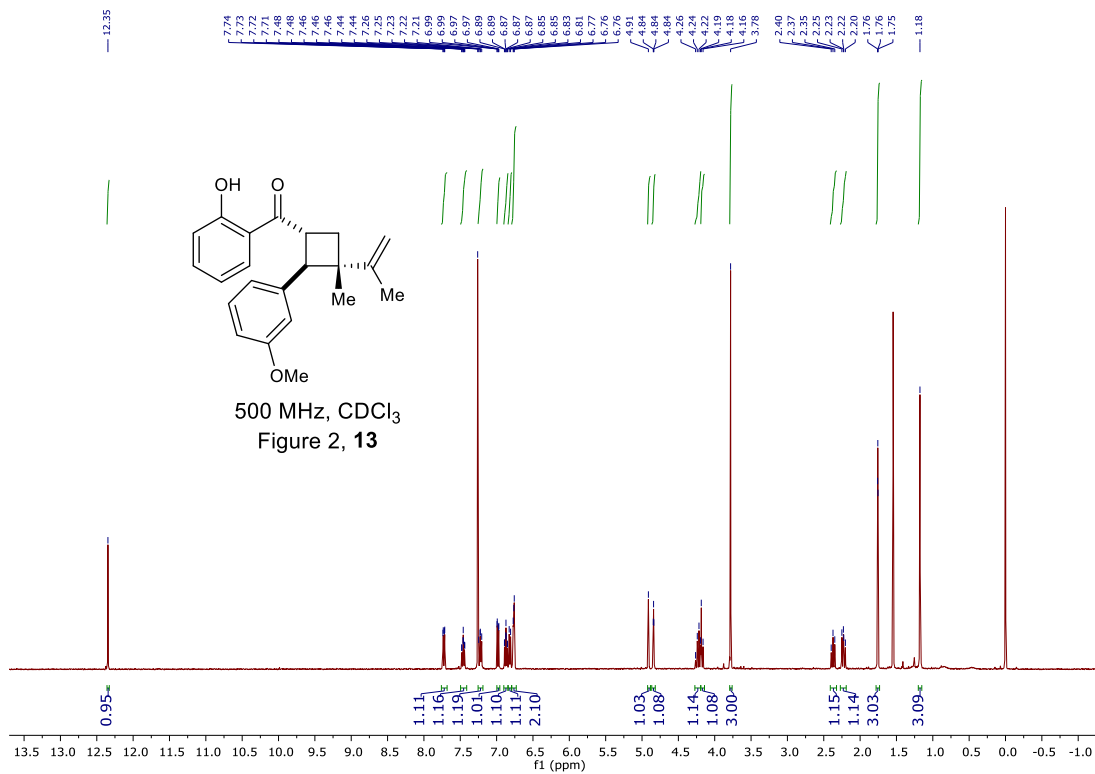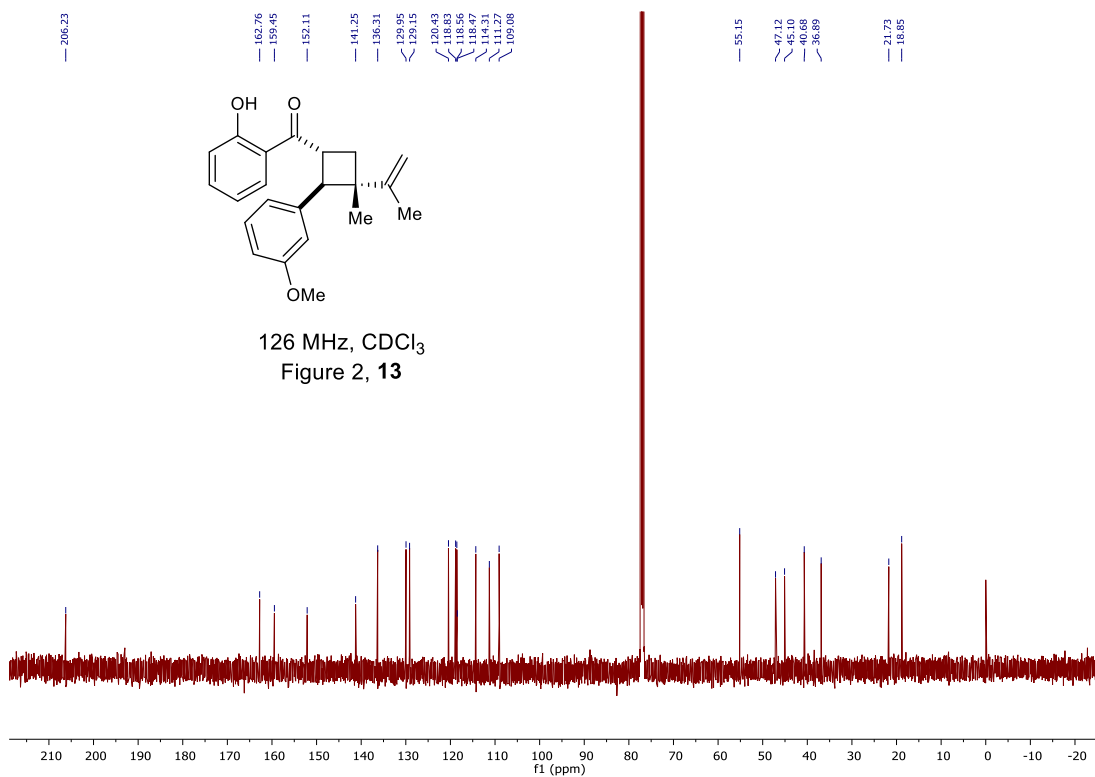

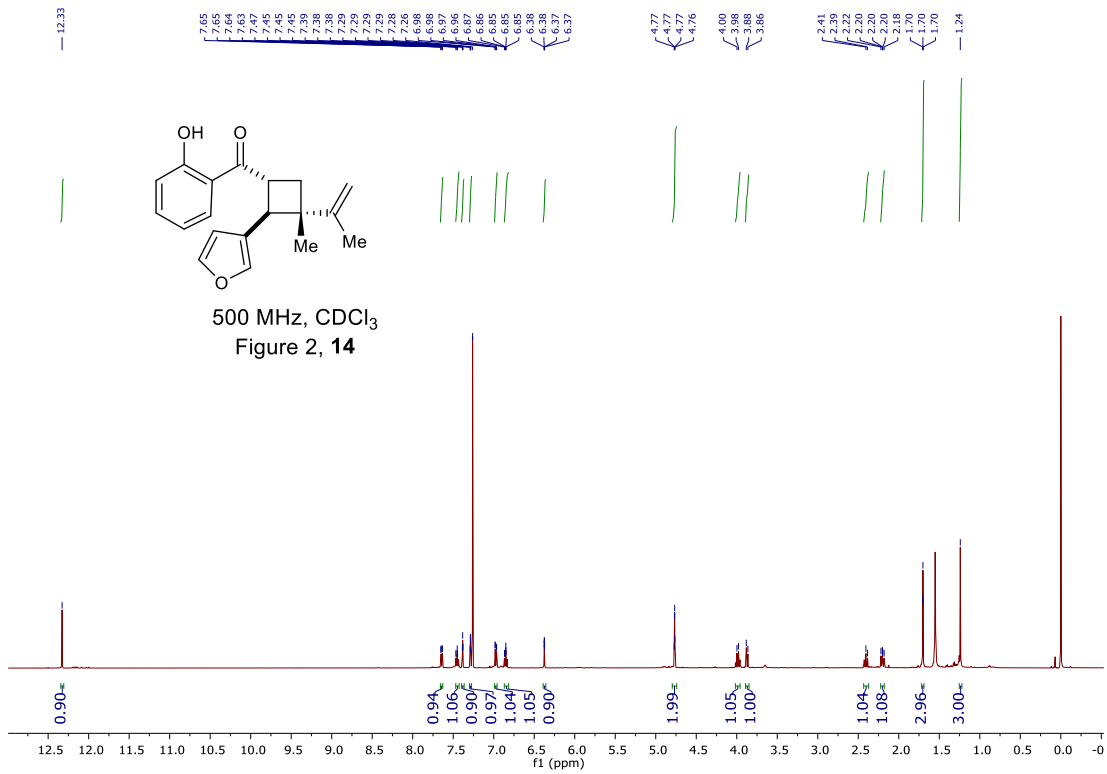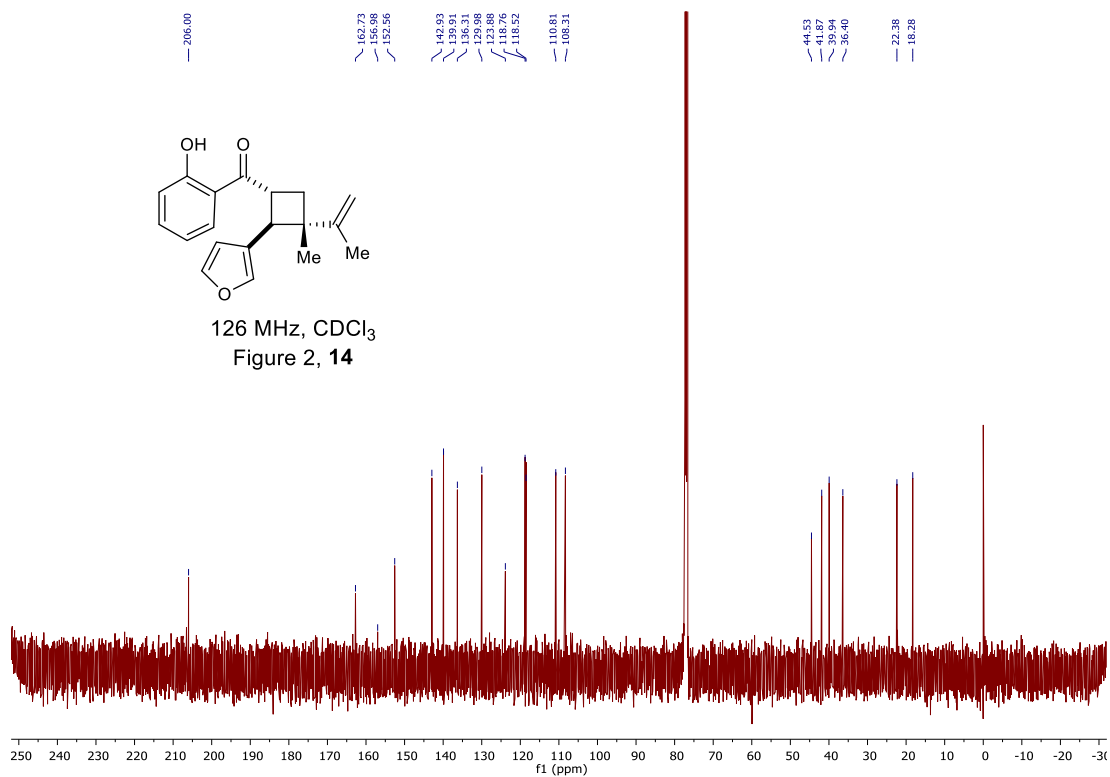

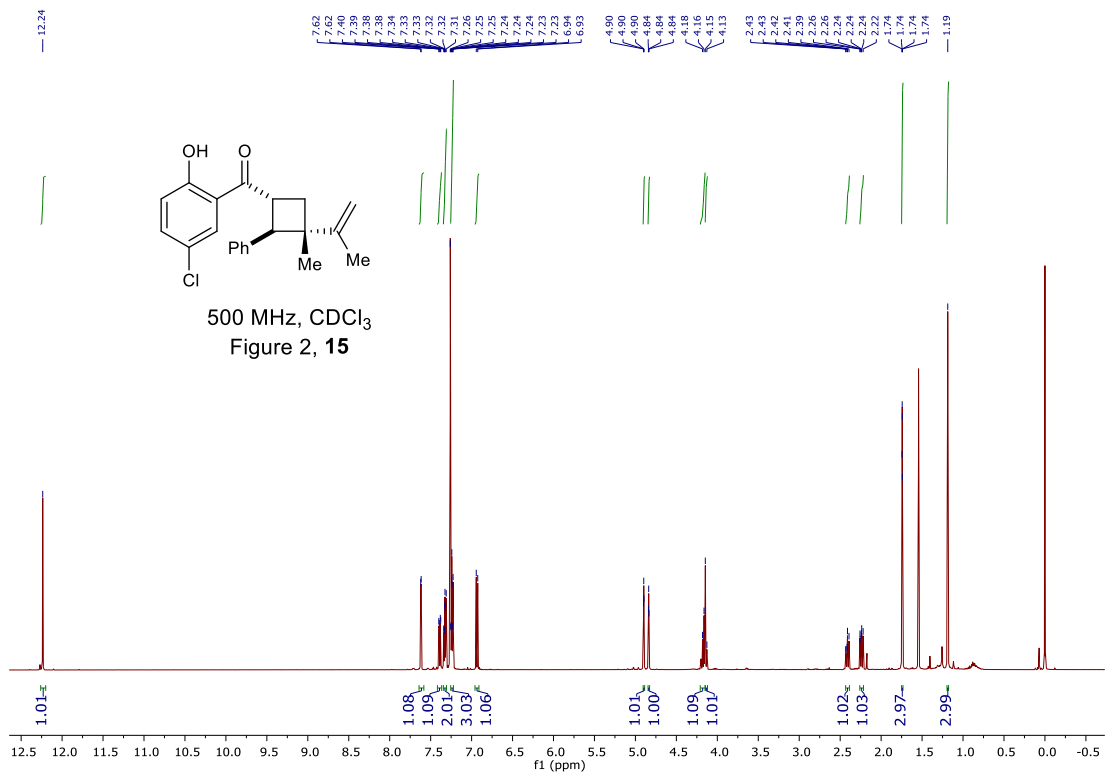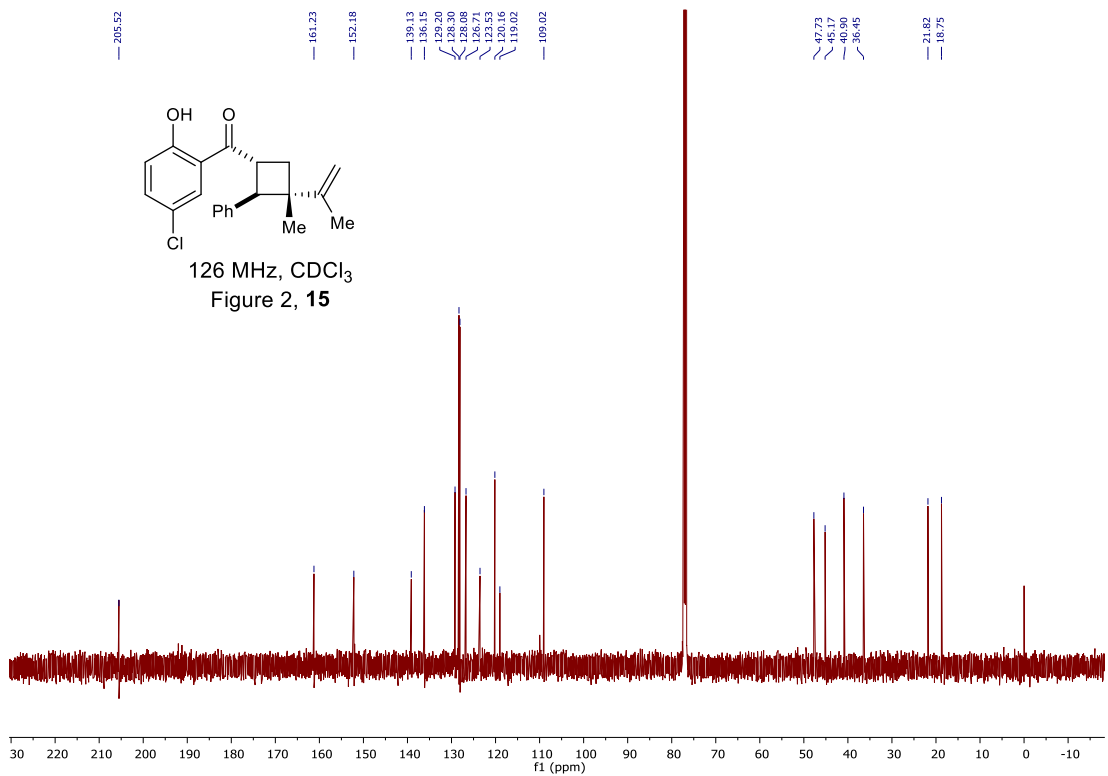

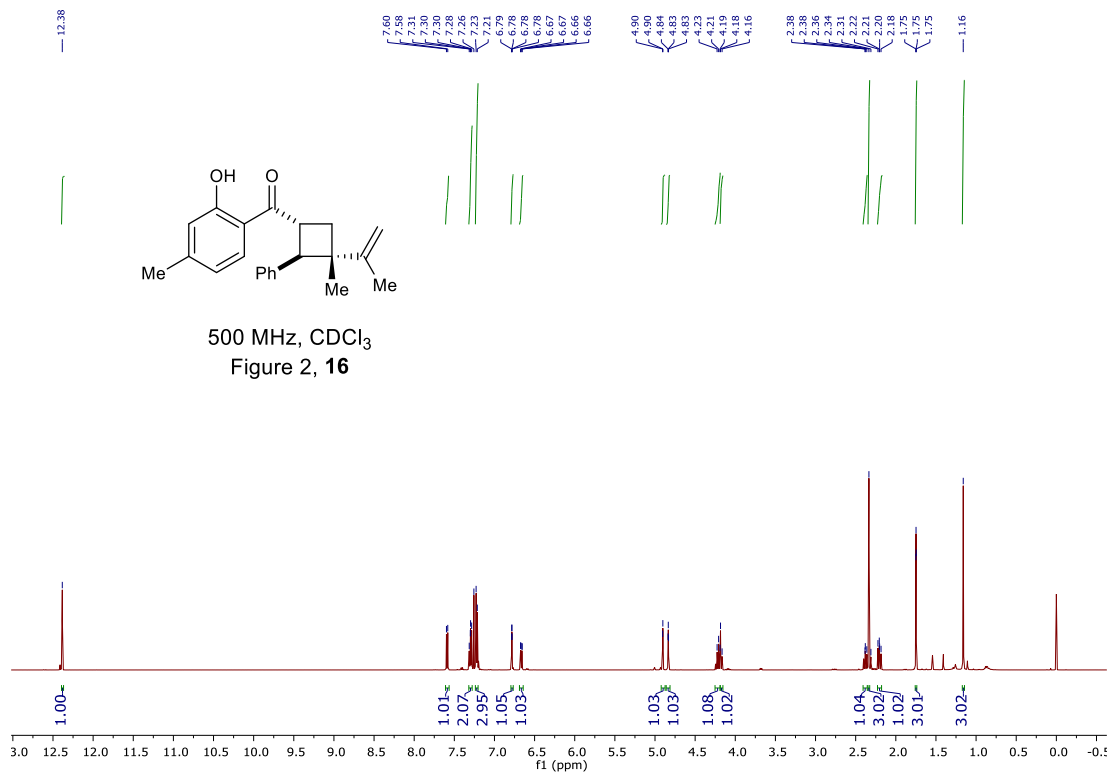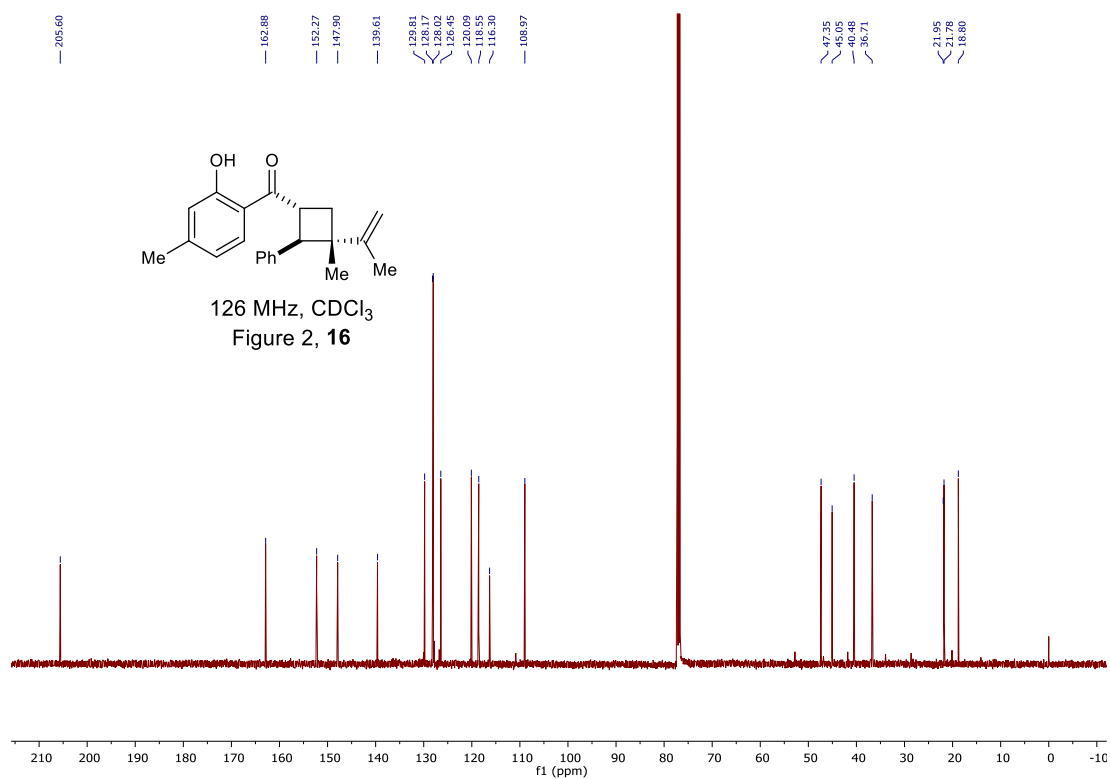

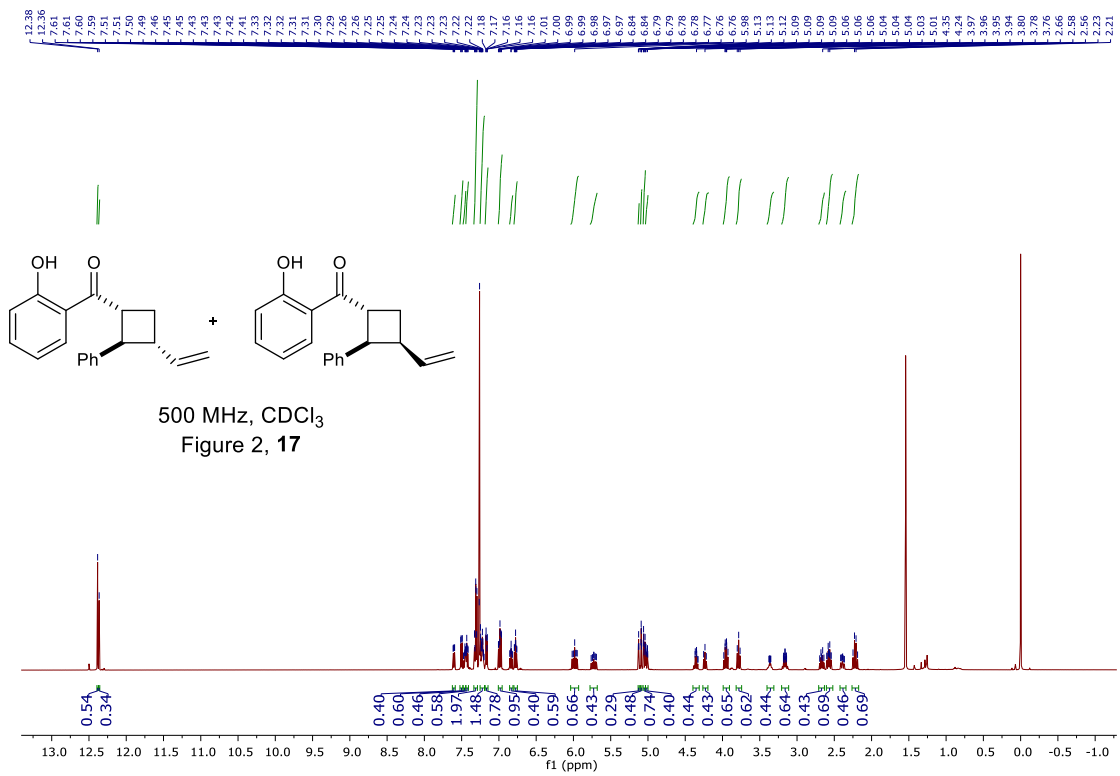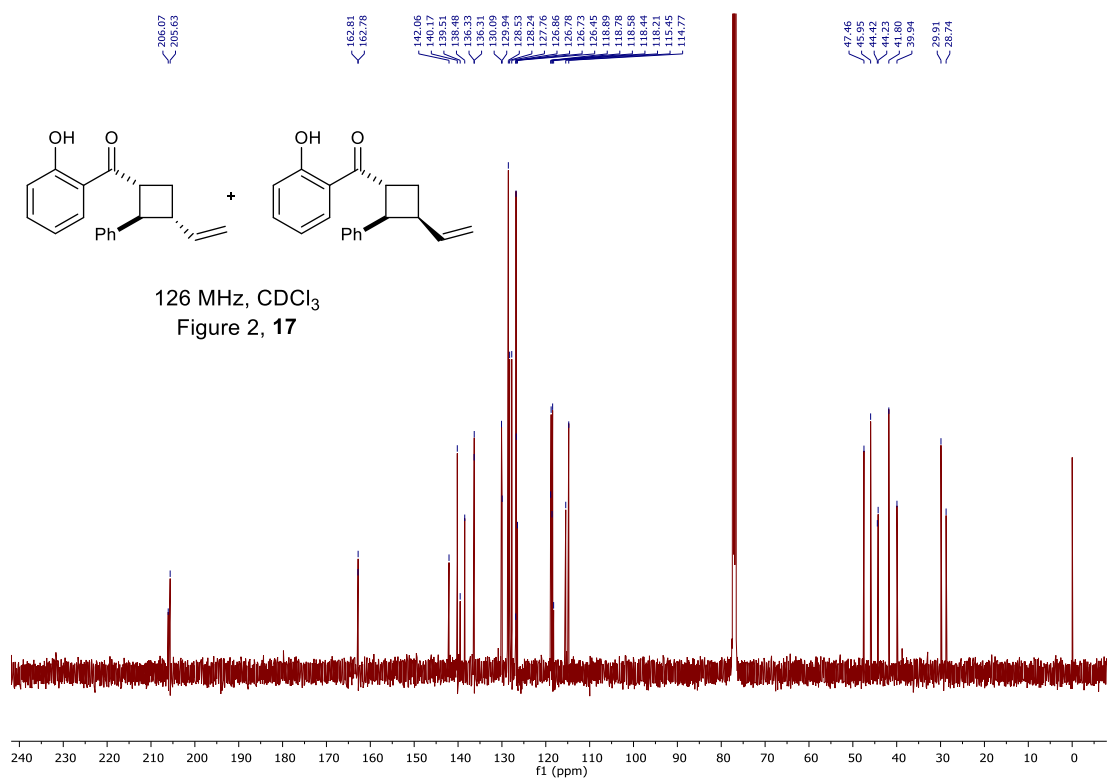



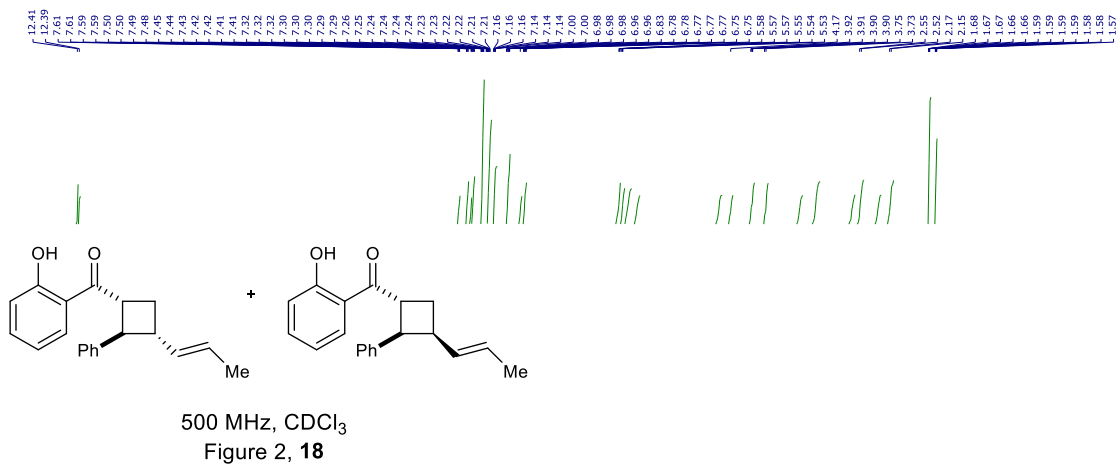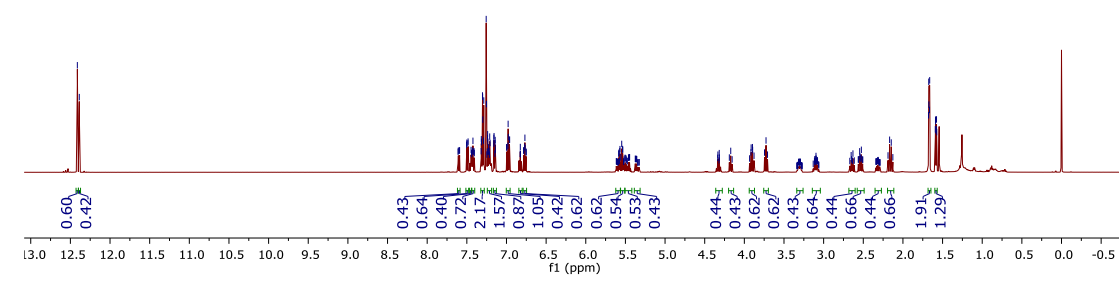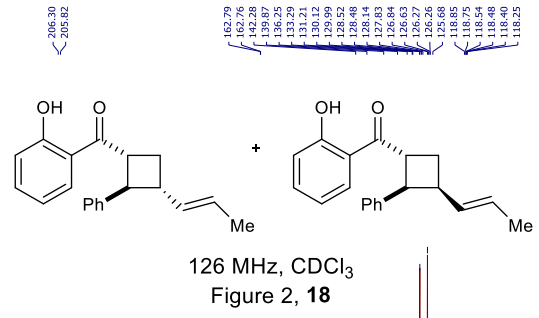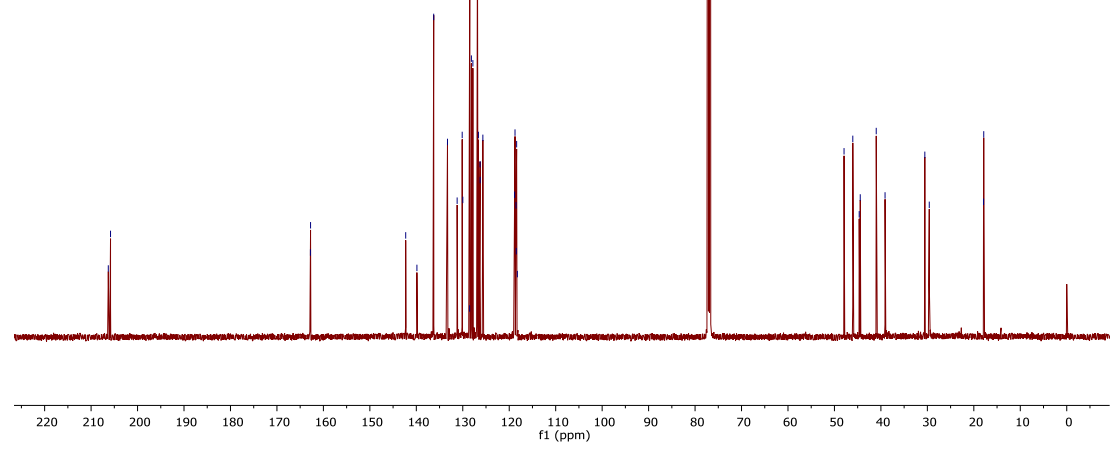





## M. References

- (1) Y. Inoue, "Asymmetric Photochemical Reactions in Solution." *Chem. Rev.* **92**, 741–770 (1992).
- (2) R. Brimiouille, D. Lenhart, M. M. Maturi, T. Bach, "Enantioselective Catalysis of Photochemical Reactions." *Angew. Chem. Int. Ed.* **54**, 3872–3890 (2015).
- (3) N. Hoffmann, "Photochemical Reactions as Key Steps in Organic Synthesis," *Chem. Rev.* **108**, 1052–1103 (2008).
- (4) T. Bach, J. P. Hehn, "Photochemical Reactions as Key Steps in Natural Product Synthesis." *Angew. Chem. Int. Ed.* **50**, 1000–1046 (2011).
- (5) C. K. Prier, D.A. Rankic, D. W. C. MacMillan, "Visible Light Photoredox Catalysis with Transition Metal Complexes: Applications in Organic Synthesis." *Chem. Rev.* **113**, 5322–5363 (2013).
- (6) J. Du, K. L. Skubi, D. M. Schultz, T. P. Yoon, "A Dual-Catalysis Approach to Enantioselective [2 + 2] Photocycloadditions Using Visible Light." *Science* **344**, 392–396 (2014).
- (7) L. J. Rono, H. G. Yayla, D. Y. Wang, M. F. Armstrong, R. R. Knowles, "Enantioselective Photoredox Catalysis Enabled by Proton-Coupled Electron Transfer: Development of an Asymmetric Aza-Pinacol Cyclization." *J. Am. Chem. Soc.* **135**, 17735–17738 (2013).
- (8) D. Uraguchi, N. Kinoshita, T. Kizu, T. Ooi, "Synergistic Catalysis of Ionic Brønsted Acid and Photosensitizer for a Redox Neutral Asymmetric  $\alpha$ -Coupling of *N*-Arylaminomethanes with Aldimines." *J. Am. Chem. Soc.* **137**, 13768–13771 (2015).
- (9) D. Nicewicz, D. W. C. MacMillan, "Merging Photoredox Catalysis with Organocatalysis: The Direct Asymmetric Alkylation of Aldehydes." *Science* **322**, 77–80 (2008).
- (10) D. A. DiRocco, T. Rovis, "Catalytic Asymmetric Acylation of Tertiary Amines Mediated by a Dual Catalysis Mode: *N*-Heterocyclic Carbene and Photoredox Catalysis." *J. Am. Chem. Soc.* **134**, 8094–8097 (2012).
- (11) A. Studer, D. P. Curran, "Catalysis of Radical Reactions: A Radical Chemistry Perspective." *Angew. Chem. Int. Ed.* **55**, 58–102 (2015).
- (12) C. Muller, A. Bauer, T. Bach, "Light-Driven Enantioselective Organocatalysis." *Angew. Chem. Int. Ed.* **48**, 6640–6642 (2009).
- (13) R. Alonso, T. Bach, "A Chiral Thioxanthone as an Organocatalyst for Enantioselective [2+2] Photocycloaddition Reactions Induced by Visible Light." *Angew. Chem. Int. Ed.* **53**, 4368–4371 (2014).
- (14) M. Maturi, T. Bach, "Enantioselective Catalysis of the Intermolecular [2+2] Photocycloaddition between 2-Pyridones and Acetylenedicarboxylates." *Angew. Chem. Int. Ed.* **53**, 7661–7664 (2014).

- (15) N. Vallavoju, S. Selvakumar, S. Jockusch, M. P. Sibi, J. Sivaguru, "Enantioselective Organo-photocatalysis Mediated by Atropisomeric Thiourea Derivatives." *Angew. Chem. Int. Ed.* **53**, 5604–5608 (2014).
- (16) A. Tröster, R. Alonso, A. Bauer, T. Bach, "Enantioselective Intermolecular [2 + 2] Photocycloaddition Reactions of 2(1*H*)-Quinolones Induced by Visible Light Irradiation," *J. Am. Chem. Soc.* **138**, 7808–7811 (2016).
- (17) H. Guo, E. Herdtweck, T. Bach, "Enantioselective Lewis Acid Catalysis in Intramolecular [2+2] Photocycloaddition Reactions of Coumarins." *Angew. Chem. Int. Ed.* **49**, 7782–7785 (2010).
- (18) R. Brimiouille, T. Bach, "[2+2] Photocycloaddition of 3-Alkenyloxy-2-cycloalkenones: Enantioselective Lewis Acid Catalysis and Ring Expansion." *Angew. Chem. Int. Ed.* **53**, 12921–12924 (2014).
- (19) R. Brimiouille, H. Guo, T. Bach, "Enantioselective Intramolecular [2+2] Photocycloaddition Reactions of 4-Substituted Coumarins Catalyzed by a Chiral Lewis Acid." *Chem. Eur. J.* **18**, 7552–7560 (2012).
- (20) R. Brimiouille, T. Bach, "Enantioselective Lewis Acid Catalysis of Intramolecular Enone Photocycloaddition Reactions." *Science* **342**, 840–843 (2013).
- (21) R. Brimiouille, A. Bauer, T. Bach, "Enantioselective Lewis Acid Catalysis in Intramolecular [2+2] Photocycloaddition Reactions: A Mechanistic Comparison between Representative Coumarin and Enone Substrates." *J. Am. Chem. Soc.* **137**, 5170–5176 (2015).
- (22) H. Wang, X. Cao, X. Chen, W. Fang, M. Dolg, "Regulatory Mechanism of the Enantioselective Intramolecular Enone [2+2] Photocycloaddition Reaction Mediated by a Chiral Lewis Acid Catalyst Containing Heavy Atoms." *Angew. Chem. Int. Ed.* **54**, 14295–14298 (2015).
- (23) F. D. Lewis, D. K. Howard, J. D. Oxman, "Lewis Acid Catalysis of Coumarin Photodimerization." *J. Am. Chem. Soc.* **105**, 3344–3345 (1983).
- (24) F. D. Lewis, S. V. Barancyk, "Lewis Acid Catalysis of Photochemical Reactions. 8. Photodimerization and Cross-Cycloaddition of Coumarin," *J. Am. Chem. Soc.* **111**, 8653–8661 (1989).
- (25) L. Ruiz Espelt, I. S. McPherson, E. M. Wiensch, T. P. Yoon, "Enantioselective Conjugate Additions of  $\alpha$ -Amino Radicals via Cooperative Photoredox and Lewis Acid Catalysis." *J. Am. Chem. Soc.* **137**, 2452–2455 (2015).
- (26) A. G. Amador, E. M. Sherbrook, T. P. Yoon, "Enantioselective Photocatalytic [3 + 2] Cycloadditions of Aryl Cyclopropyl Ketones." *J. Am. Chem. Soc.* **138**, 4722–4725 (2016).
- (27) Y. Norikane, H. Itoh, T. Arai, "Photochemistry of 2'-Hydroxychalcone. One-way Cis-Trans Photoisomerization Induced by Adiabatic Intramolecular Hydrogen Atom Transfer." *J. Phys. Chem. A.* **106**, 2766–2776 (2002).
- (28) K. Kalyanasundaram, "Photophysics, Photochemistry and Solar Energy Conversion with Tris(bipyridyl)ruthenium(II) and Its Analogues." *Coord. Chem. Rev.* **46**, 159–244 (1982).

- (29) See Supplementary Material for more details.
- (30) The absolute configuration of the cycloadducts was determined by Riley oxidation of compound **9** to a crystalline derivative, which was analyzed by single-crystal X-ray crystallography. See Supplementary Material for details.
- (31) The nature of this background process is currently poorly understood, and is the subject of ongoing studies.
- (32) H. Cong, D. Ledbetter, G. T. Rowe, J. P. Caradonna, J. A. Porco, "Electron Transfer-Initiated Diels–Alder Cycloadditions of 2'-Hydroxychalcones." *J. Am. Chem. Soc.* **130**, 9214–9215 (2008).
- (33) H. Cong, C. Becker, S. Elliott, M. W. Grinstaff, J. A. Porco, "Silver Nanoparticle-Catalyzed Diels–Alder Cycloadditions of 2'-Hydroxychalcones." *J. Am. Chem. Soc.* **132**, 7514–7518 (2010).
- (34) C. M. Elliott, R. A. Freitag, D. D. Blaney, "Electrochemistry, Spectroelectrochemistry, and Photochemistry of a Series of New Covalently Linked Tris(2,2-bipyridine)ruthenium(II)/Diquat Complexes," *J. Am. Chem. Soc.* **107**, 4647–4655 (1985).
- (35) W. G. Herkstroeter, A. A. Lamola, G. S. Hammond, "Mechanisms of Photochemical Reactions in Solution. XXVIII. Values of Triplet Excitation Energies of Selected Sensitizers." *J. Am. Chem. Soc.* **86**, 4537–4540 (1964).
- (36) E. N. Jacobsen, W. Zhang, M. L. Guier, M. L. "Electronic Tuning of Asymmetric Catalysts." *J. Am. Chem. Soc.* **113**, 6704–6706 (1991).
- (37) See Supplementary Material for details on these computational studies.
- (38) A. B. Pangborn, M. A. Giardello, R. H. Grubbs, R. K. Rosen, F. J. Timmers, "Safe and Convenient Procedure for Solvent Purification." *Organometallics*, **15**, 1518–1520 (1996).
- (39) A. Cornejo, J. M. Fraile, J. I. García, M. J. Gil, V. Martínez-Merino, J. A. Mayoral, E. Pires, I. Villalba, "An efficient and general one-pot method for the synthesis of chiral bis(oxazoline) and pyridine bis(oxazoline) ligands." *Synlett* 2321–2324 (2005).
- (40) M. A. Ischay, Z. Lu, T. P. Yoon, "[2+2] Cycloadditions by Oxidative Visible Light Photocatalysis." *J. Am. Chem. Soc.* **132**, 8572–8574 (2010).
- (41) A. Minatti, X. Zheng, S. L. Buchwald, "Synthesis of Chiral 3-Substituted Indanones via an Enantioselective Reductive-Heck Reaction," *J. Org. Chem.*, **72**, 9253–9258 (2007).
- (42) A. Furstner, T. Gastner, "Total Synthesis of Cristatic Acid," *Org. Lett.* **2**, 2467–2470 (2000).
- (43) Bruker-AXS (2015). *APEX3*. Version 2015.9-0. Madison, Wisconsin, USA.
- (44) L. Krause, R. Herbst-Irmer, G. M. Sheldrick, D. Stalke, "Comparison of silver and molybdenum microfocus X-ray sources for single-crystal structure determination." *J. Appl. Cryst.* **48**, 3–10 (2015).

- (45) G. M. Sheldrick, (2013b). *XPREP*. Version 2013/1. Georg-August-Universität Göttingen, Göttingen, Germany.
- (46) G. M. Sheldrick, (2013a). The *SHELX* homepage, <http://shelx.uni-ac.gwdg.de/SHELX/>.
- (47) G. M. Sheldrick, “SHELXT– Integrated space-group and crystal-structure determination.” *Acta Cryst. A*, **71**, 3-8 (2015a).
- (48) G. M. Sheldrick, “Crystal structure refinement with SHELXL.” *Acta Cryst. C*, **71**, 3-8 (2015b).
- (49) O. V. Dolomanov, L. J. Bourhis, R. J. Gildea, J. A. K. Howard, H. Puschmann, H. “OLEX2: a complete structure solution, refinement and analysis program.” *J. Appl. Crystallogr.* **42**, 339–341 (2009).
- (50) I. A. Guzei, Programs *Gn*. University of Wisconsin-Madison, Madison, Wisconsin, USA (2007–2013).
- (51) Gaussian 09, Revision D.01, M. J. Frisch, G. W. Trucks, H. B. Schlegel, G. E. Scuseria, M. A. Robb, J. R. Cheeseman, G. Scalmani, V. Barone, B. Mennucci, G. A. Petersson, H. Nakatsuji, M. Caricato, X. Li, H. P. Hratchian, A. F. Izmaylov, J. Bloino, G. Zheng, J. L. Sonnenberg, M. Hada, M. Ehara, K. Toyota, R. Fukuda, J. Hasegawa, M. Ishida, T. Nakajima, Y. Honda, O. Kitao, H. Nakai, T. Vreven, J. A. Montgomery, J. E. Jr.; Peralta, F. Ogliaro, M. Bearpark, J. J. Heyd, E. Brothers, K. N. Kudin, V. N. Staroverov, R. Kobayashi, J. Normand, K. Raghavachari, A. Rendell, J. C. Burant, S. S. Iyengar, J. Tomasi, M. Cossi, N. Rega, J. M. Millam, M. Klene, J. E. Knox, J. B. Cross, V. Bakken, C. Adamo, J. Jaramillo, R. Gomperts, R. E. Stratmann, O. Yazyev, A. J. Austin, R. Cammi, C. Pomelli, J. W. Ochterski, R. L. Martin, K. Morokuma, V. G. Zakrzewski, G. A. Voth, P. Salvador, J. J. Dannenberg, S. Dapprich, A. D. Daniels, Ö. Farkas, J. B. Foresman, J. V. Ortiz, J. Cioslowski, D. J.; Fox, Gaussian, Inc., Wallingford CT, 2009.
